# Supplementary material for: Asymmetric synthesis of polysubstituted chiral chromans via an organocatalytic oxa-Michael-nitro-Michael domino reaction
Source: Royal Society of Chemistry journal article supplement (doi:10.1039/c7ra13525d), 2018-01-01
Supplement: c7ra13525d1.pdf [file c7ra13525d1.pdf]

# Supporting Information

## **Asymmetric synthesis of polysubstituted chiral chromans via an organocatalytic oxa-Michael-nitro- Michael domino reaction**

Cheng-Ke Tang, Kai-Xiang Feng, Ai-Bao Xia,\* Chen Li, Ya-Yun Zheng,  
Zhen-Yuan Xu and Dan-Qian Xu\*

*State Key Laboratory Breeding Base of Green Chemistry-Synthesis  
Technology, Zhejiang University of Technology, Hangzhou, 310014,  
Zhejiang, China*

*Fax (+86) 0571 88320066;*

*E-mail: xiaaibao@zjut.edu.cn, chrc@zjut.edu.cn.*

| <b>Table of Contents</b> |                                                                                                                               | <b>Page</b>      |
|--------------------------|-------------------------------------------------------------------------------------------------------------------------------|------------------|
| <b>1</b>                 | <b>General information</b>                                                                                                    | <b>S-3</b>       |
| <b>2</b>                 | <b>Typical experimental procedure for the oxa-Michael-nitro-Michael domino reaction and selected data for compounds 4a-5a</b> | <b>S-4~S-17</b>  |
| <b>3</b>                 | <b><sup>1</sup>H, <sup>13</sup>C NMR spectra and HPLC chromatograms of compounds 4a-5a</b>                                    | <b>S-18~S-71</b> |
| <b>4</b>                 | <b>X-ray crystal structure of compound 4s</b>                                                                                 | <b>S-72</b>      |

## 1. General information

NMR data were obtained on Bruker AVANCE III for  $^1\text{H}$  at 500 MHz and for  $^{13}\text{C}$  at 125 MHz with TMS as the internal standard. HRMS data were measured on Waters Premier GC/TOF-MS with EI source. In each case, enantiomeric ratio was determined on a chiral column in comparison with authentic racemates by chiral HPLC, using a JASCO LC-2000 Plus system consisting of MD-2010 HPLC diode array detector. GC-MS experiments were performed on an Agilent 6890N GC system with a 5973N mass selective detector. Column chromatography and flash chromatography experiments were conducted using silica gel GF254 (200-300mesh) eluting with ethyl ether and petroleum ether. TLC experiments were carried out on glass-backed silica plates. Chemicals were used without purification as commercially available.

## 2. Typical experimental procedure for the oxa-Michael-nitro-Michael domino reaction and selected data for compounds 4a-5a

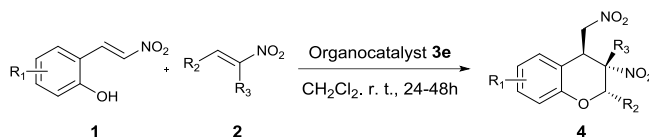

2-Hydroxynitrostyrenes **1** (0.02 mmol) and *trans*- $\beta$ -nitroolefins **2** (0.024 mmol) were stirred under dichloromethane in the presence of catalyst **3e** (0.001 mmol) at room temperature, and the reaction was monitored by GC-MS. After completion, the reaction mixture was dried and concentrated. The residue was purified by flash chromatography to give the domino reaction products. The enantiomeric ratio was determined by HPLC analysis on a chiral column.

The 2-hydroxynitrostyrenes with different substituted groups<sup>1</sup> and aliphatic nitroolefins<sup>2</sup> were prepared according to the reported literature procedures.

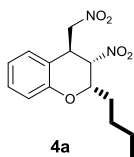

**(2S,3S,4S)-2-butyl-3-nitro-4-(nitromethyl)chromane**, white solid, mp 106-108 °C, 78% yield, 92% ee, >20:1 dr. The enantiomeric excess was determined by HPLC on Daicel Chiralpak OJ-H with hexane/*i*-PrOH (85:15) as the eluent, flow = 1.0 mL/min, UV = 212 nm,  $[\alpha]_D^{25} = -99.000$  (c = 1 in CH<sub>2</sub>Cl<sub>2</sub>). **<sup>1</sup>H NMR** (500 MHz, CDCl<sub>3</sub>):  $\delta$  7.28-7.22 (m, 2H), 7.07-7.04 (m, 1H), 6.95 (dd, *J* = 8, 1.5 Hz, 1H), 5.02 (t, *J* = 2.5 Hz, 1H), 4.71 (dd, *J* = 14, 3.5 Hz, 1H), 4.60 (dd, *J* = 14, 4 Hz, 1H), 4.25-4.22 (m, 1H), 4.19-4.16 (m, 1H), 1.93-1.85 (m, 1H), 1.81-1.74 (m, 1H), 1.68-1.60 (m, 1H), 1.57-1.50 (m, 1H), 1.47-1.30 (m, 2H), 0.97 (t, *J* = 7.5 Hz, 3H); **<sup>13</sup>C NMR** (125 MHz, CDCl<sub>3</sub>):  $\delta$  153.8, 129.5, 128.4, 122.4, 117.8, 116.4, 81.9, 78.2, 72.1, 36.6, 30.6, 27.6, 22.3, 13.9 ppm. HRMS (EI<sup>+</sup>) calcd for [C<sub>14</sub>H<sub>18</sub>N<sub>2</sub>O<sub>5</sub>]<sup>+</sup> *m/z* 294.1216, found 294.1231.

<sup>1</sup> D. B. Ramachary and R. Sakthidevi, *Org. Biomol. Chem.*, 2010, **8**, 4259;

<sup>2</sup> D. Lucet, S. Sabelle, O. Kostelitz, T. L. Gall and C. Mioskowski, *Eur. J. Org. Chem.*, **1999**, 2583.

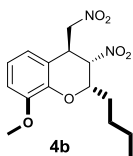

(*2S,3S,4S*)-2-butyl-8-methoxy-3-nitro-4-(nitromethyl)chromane, white solid, mp 158-160 °C, 82% yield, 98% ee, >20:1 dr. The enantiomeric excess was determined by HPLC on Daicel Chiralpak AS-H with hexane/*i*-PrOH (70:30) as the eluent, flow = 1.0 mL/min, UV = 212 nm,  $[\alpha]_D^{22} = -93.939$  ( $c = 0.66$  in  $\text{CH}_2\text{Cl}_2$ ).  $^1\text{H NMR}$  (500 MHz,  $\text{CDCl}_3$ ):  $\delta$  7.00 (t,  $J = 8$  Hz, 1H), 6.86-6.82 (m, 2H), 5.05 (t,  $J = 2$  Hz, 1H), 4.82 (dd,  $J = 14, 4$  Hz, 1H), 4.59 (dd,  $J = 14, 10.5$  Hz, 1H), 4.27-4.23 (m, 1H), 4.22-4.19 (m, 1H), 3.87 (s, 3H), 2.02-1.95 (m, 1H), 1.83-1.76 (m, 1H), 1.67-1.50 (m, 2H), 1.47-1.40 (m, 2H), 0.97 (t,  $J = 7.5$  Hz, 3H);  $^{13}\text{C NMR}$  (125 MHz,  $\text{CDCl}_3$ ):  $\delta$  148.8, 143.6, 122.2, 119.6, 117.3, 111.3, 81.5, 78.1, 72.6, 56.1, 36.4, 30.3, 27.5, 22.3, 13.8 ppm. HRMS (EI+) calcd for  $[\text{C}_{15}\text{H}_{20}\text{N}_2\text{O}_6]^+$   $m/z$  324.1321, found 324.1315.

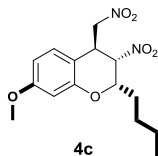

(*2S,3S,4S*)-2-butyl-7-methoxy-3-nitro-4-(nitromethyl)chromane, white solid, mp 161-163 °C, 75% yield, >99% ee, >20:1 dr. The enantiomeric excess was determined by HPLC on Daicel Chiralpak AS-H with hexane/*i*-PrOH (90:10) as the eluent, flow = 1.0 mL/min, UV = 212 nm,  $[\alpha]_D^{22} = -100.000$  ( $c = 0.28$  in  $\text{CH}_2\text{Cl}_2$ ).  $^1\text{H NMR}$  (500 MHz,  $\text{CDCl}_3$ ):  $\delta$  7.12 (d,  $J = 8$  Hz, 1H), 6.64 (dd,  $J = 8.5, 2.5$  Hz, 1H), 6.48 (d,  $J = 2.5$  Hz, 1H), 5.00 (s, 1H), 4.77 (dd,  $J = 13.5, 3.5$  Hz, 1H), 4.57 (t,  $J = 10.5$  Hz, 1H), 4.18-4.16 (m, 2H), 3.80 (s, 3H), 1.92-1.85 (m, 1H), 1.80-1.73 (m, 1H), 1.66-1.59 (m, 1H), 1.55-1.51 (m, 1H), 1.47-1.40 (m, 2H), 0.98 (t,  $J = 7$  Hz, 3H);  $^{13}\text{C NMR}$  (125 MHz,  $\text{CDCl}_3$ ):  $\delta$  160.5, 154.8, 129.1, 110.0, 108.1, 102.1, 81.8, 78.2, 72.2, 55.4, 36.2, 30.6, 27.6, 22.3, 13.9 ppm. HRMS (EI+) calcd for  $[\text{C}_{15}\text{H}_{20}\text{N}_2\text{O}_6]^+$   $m/z$  324.1321, found 324.1320.

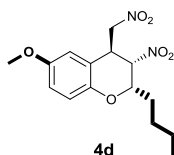

*(2S,3S,4S)*-2-butyl-6-methoxy-3-nitro-4-(nitromethyl)chromane, white solid, mp 152-154 °C, 76% yield, 98% ee, >20:1 dr. The enantiomeric excess was determined by HPLC on Daicel Chiralpak AS-H with hexane/*i*-PrOH (90:10) as the eluent, flow = 1.0 mL/min, UV = 212 nm,  $[\alpha]_D^{22} = -97.623$  (c = 0.53 in CH<sub>2</sub>Cl<sub>2</sub>). **<sup>1</sup>H NMR** (500 MHz, CDCl<sub>3</sub>): δ 6.88 (t, *J* = 9 Hz, 1H), 6.85-6.82 (m, 1H), 6.72-6.72 (d, *J* = 3 Hz, 1H), 4.98 (t, *J* = 2.5 Hz, 1H), 4.82 (dd, *J* = 14, 4 Hz, 1H), 4.59 (d, *J* = 14, 10.5 Hz, 1H), 4.23-4.19 (m, 1H), 4.13-4.10 (m, 1H), 3.79 (s, 3H), 1.91-1.83 (m, 1H), 1.79-1.72 (m, 1H), 1.66-1.60 (m, 1H), 1.56-1.48 (m, 1H), 1.47-1.40 (m, 2H), 0.97 (s, 3H); **<sup>13</sup>C NMR** (125 MHz, CDCl<sub>3</sub>): δ 154.7, 147.8, 118.6, 116.8, 115.8, 112.6, 81.9, 78.1, 72.2, 55.8, 36.8, 30.6, 27.6, 22.3, 13.9 ppm. HRMS (EI<sup>+</sup>) calcd for [C<sub>15</sub>H<sub>20</sub>N<sub>2</sub>O<sub>6</sub>]<sup>+</sup> m/z 324.1321, found 324.1304.

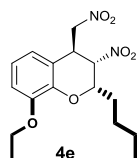

*(2S,3S,4S)*-2-butyl-8-ethoxy-3-nitro-4-(nitromethyl)chromane, white solid, mp 159-162 °C, 77% yield, >99% ee, >20:1 dr. The enantiomeric excess was determined by HPLC on Daicel Chiralpak AS-H with hexane/*i*-PrOH (70:30) as the eluent, flow = 1.0 mL/min, UV = 212 nm,  $[\alpha]_D^{22} = -110.610$  (c = 0.66 in CH<sub>2</sub>Cl<sub>2</sub>). **<sup>1</sup>H NMR** (500 MHz, CDCl<sub>3</sub>): δ 6.98 (t, *J* = 8 Hz, 1H), 6.86-6.81 (m, 2H), 5.04 (t, *J* = 2.5 Hz, 1H), 4.82 (dd, *J* = 14, 4 Hz, 1H), 4.60 (dd, *J* = 14, 10 Hz, 1H), 4.27-4.20 (m, 2H), 4.11-4.04 (m, 2H), 2.00-1.93 (m, 1H), 1.82-1.75 (m, 1H), 1.67-1.60 (m, 1H), 1.57-1.51 (m, 1H), 1.48-1.41 (m, 5H), 0.97 (t, *J* = 7.5 Hz, 3H); **<sup>13</sup>C NMR** (125 MHz, CDCl<sub>3</sub>): δ 148.2, 144.0, 122.1, 119.7, 117.4, 113.1, 81.8, 78.1, 72.6, 64.8, 36.5, 30.2, 27.6, 22.3, 14.8, 13.9 ppm. HRMS (EI<sup>+</sup>) calcd for [C<sub>16</sub>H<sub>22</sub>N<sub>2</sub>O<sub>6</sub>]<sup>+</sup> m/z 338.1478, found 338.1467.

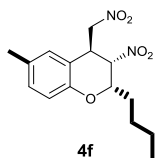

**(2S,3S,4S)-2-butyl-6-methyl-3-nitro-4-(nitromethyl)chromane**, white solid, mp 154-156 °C, 71% yield, >99% ee, >20:1 dr. The enantiomeric excess was determined by HPLC on Daicel Chiralpak AS-H with hexane/*i*-PrOH (90:10) as the eluent, flow = 1.0 mL/min, UV = 212 nm,  $[\alpha]_D^{22} = -81.250$  (c = 0.16 in CH<sub>2</sub>Cl<sub>2</sub>). **<sup>1</sup>H NMR** (500 MHz, CDCl<sub>3</sub>): δ 7.07-7.02 (m, 2H), 6.84 (d, *J* = 8.5 Hz, 1H), 4.99 (t, *J* = 2.5 Hz, 1H), 4.81 (dd, *J* = 13.5, 3.5 Hz, 1H), 4.58 (dd, *J* = 14, 10.5 Hz, 1H), 4.21-4.18 (m, 1H), 4.15-4.12 (m, 1H), 2.32 (s, 3H), 1.92-1.85 (m, 1H), 1.80-1.73 (m, 1H), 1.67-1.59 (m, 1H), 1.55-1.49 (m, 1H), 1.48-1.39 (m, 2H), 0.97 (t, *J* = 7 Hz, 3H); **<sup>13</sup>C NMR** (125 MHz, CDCl<sub>3</sub>): δ 151.7, 131.9, 130.3, 128.6, 117.5, 115.9, 81.9, 78.2, 72.1, 36.6, 30.6, 27.6, 22.4, 20.6, 13.9 ppm. HRMS (EI<sup>+</sup>) calcd for [C<sub>15</sub>H<sub>20</sub>N<sub>2</sub>O<sub>5</sub>]<sup>+</sup> *m/z* 308.1372, found 308.1356.

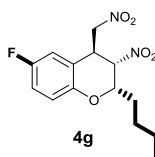

**(2S,3S,4S)-2-butyl-6-fluoro-3-nitro-4-(nitromethyl)chromane**, white solid, mp 118-120 °C, 77% yield, 71% ee, >20:1 dr. The enantiomeric excess was determined by HPLC on Daicel Chiralpak IC with hexane/*i*-PrOH (99:1) as the eluent, flow = 1.0 mL/min, UV = 212 nm.  $[\alpha]_D^{22} = -94.000$  (c = 0.5 in CH<sub>2</sub>Cl<sub>2</sub>). **<sup>1</sup>H NMR** (500 MHz, CDCl<sub>3</sub>): δ 7.01-6.91 (m, 3H), 5.00 (t, *J* = 2.5 Hz, 1H), 4.79 (dd, *J* = 9, 4 Hz, 1H), 4.61 (dd, *J* = 14, 10 Hz, 1H), 4.24-4.20 (m, 1H), 4.15-4.12 (m, 1H), 1.89-1.84 (m, 1H), 1.80-1.73 (m, 1H), 1.64-1.51 (m, 2H), 1.45-1.40 (m, 2H), 0.99-0.96 (t, *J* = 7.5 Hz, 3H); **<sup>13</sup>C NMR** (125 MHz, CDCl<sub>3</sub>): δ 156.7 (d, <sup>1</sup>*J*<sub>C-F</sub> = 240.3 Hz), 149.9 (d, <sup>4</sup>*J*<sub>C-F</sub> = 2.3 Hz), 119.1 (d, <sup>3</sup>*J*<sub>C-F</sub> = 8.1 Hz), 117.4 (d, <sup>3</sup>*J*<sub>C-F</sub> = 7.4 Hz), 116.8 (d, <sup>2</sup>*J*<sub>C-F</sub> = 23.1 Hz), 114.4 (d, <sup>2</sup>*J*<sub>C-F</sub> = 24.1 Hz), 81.5, 77.9, 72.4, 36.6, 30.5, 27.5, 22.3, 13.9 ppm. HRMS (EI<sup>+</sup>) calcd for [C<sub>14</sub>H<sub>17</sub>FN<sub>2</sub>O<sub>5</sub>]<sup>+</sup> *m/z* 312.1122, found 312.1123.

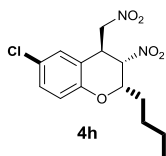

(*2S,3S,4S*)-2-butyl-6-chloro-3-nitro-4-(nitromethyl)chromane, yellow solid, mp 125-127 °C, 68% yield, 98% ee, >20:1 dr. The enantiomeric excess was determined by HPLC on Daicel Chiralpak AS-H with hexane/*i*-PrOH (80:20) as the eluent, flow = 1.0 mL/min, UV = 212 nm,  $[\alpha]_D^{22} = -103.850$  ( $c = 0.26$  in  $\text{CH}_2\text{Cl}_2$ ). **<sup>1</sup>H NMR** (500 MHz,  $\text{CDCl}_3$ ):  $\delta$  7.24-7.22 (m, 2H), 6.90 (d,  $J = 9.5$  Hz, 1H), 5.00 (t,  $J = 2.5$  Hz, 1H), 4.80 (dd,  $J = 14, 4$  Hz, 1H), 4.59 (dd,  $J = 14, 10.5$  Hz, 1H), 4.23-4.19 (m, 1H), 4.16-4.13 (m, 1H), 1.92-1.84 (m, 1H), 1.81-1.74 (m, 1H), 1.65-1.58 (m, 1H), 1.55-1.49 (m, 1H), 1.45-1.40 (m, 2H), 0.97 (t,  $J = 7$  Hz, 3H); **<sup>13</sup>C NMR** (125 MHz,  $\text{CDCl}_3$ ):  $\delta$  152.5, 129.7, 128.1, 127.3, 119.2, 117.9, 81.4, 77.3, 72.3, 36.4, 30.6, 27.5, 22.3, 13.9 ppm. HRMS (EI+) calcd for  $[\text{C}_{14}\text{H}_{17}\text{ClN}_2\text{O}_5]^+$   $m/z$  328.0826, found 328.0805.

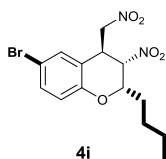

(*2S,3S,4S*)-6-bromo-2-butyl-3-nitro-4-(nitromethyl)chromane, yellow solid, mp 105-107 °C, 68% yield, >99% ee, >20:1 dr. The enantiomeric excess was determined by HPLC on Daicel Chiralpak AS-H with hexane/*i*-PrOH (95:5) as the eluent, flow = 1.0 mL/min, UV = 212 nm,  $[\alpha]_D^{22} = -98.124$  ( $c = 0.5$  in  $\text{CH}_2\text{Cl}_2$ ). **<sup>1</sup>H NMR** (500 MHz,  $\text{CDCl}_3$ ):  $\delta$  7.37-7.34 (m, 2H), 6.84 (d,  $J = 8.5$  Hz, 1H), 4.99 (t,  $J = 2$  Hz, 1H), 4.79 (dd,  $J = 14, 4$  Hz, 1H), 4.58 (dd,  $J = 14, 10.5$  Hz, 1H), 4.22-4.19 (m, 1H), 4.15-4.12 (m, 1H), 1.91-1.84 (m, 1H), 1.81-1.74 (m, 1H), 1.65-1.57 (m, 1H), 1.55-1.48 (m, 1H), 1.46-1.39 (m, 2H), 0.97 (t,  $J = 7$  Hz, 3H); **<sup>13</sup>C NMR** (125 MHz,  $\text{CDCl}_3$ ):  $\delta$  153.0, 132.6, 131.1, 119.6, 118.4, 114.4, 81.4, 77.8, 72.2, 36.4, 30.6, 27.5, 22.3, 13.8 ppm. HRMS (EI+) calcd for  $[\text{C}_{14}\text{H}_{17}\text{BrN}_2\text{O}_5]^+$   $m/z$  372.0321, found 372.0338.



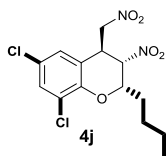

(*2S,3S,4S*)-2-butyl-6,8-dichloro-3-nitro-4-(nitromethyl)chromane, yellow solid, mp 135-137 °C, 65% yield, 88% ee, >20:1 dr. The enantiomeric excess was determined by HPLC on Daicel Chiralpak AS-H with hexane/*i*-PrOH (90:10) as the eluent, flow = 1.0 mL/min, UV = 212 nm,  $[\alpha]_D^{22} = -108.713$  (c = 0.28 in CH<sub>2</sub>Cl<sub>2</sub>). **<sup>1</sup>H NMR** (500 MHz, CDCl<sub>3</sub>): δ 7.37 (d, *J* = 2.5 Hz, 1H), 7.16 (dd, *J* = 2.5, 1 Hz, 1H), 5.03 (t, *J* = 4 Hz, 1H), 4.78 (dd, *J* = 14, 4 Hz, 1H), 4.56 (dd, *J* = 14.5, 10.5 Hz, 1H), 4.25-4.20 (m, 2H), 1.96-1.89 (m, 1H), 1.84-1.77 (m, 1H), 1.72-1.63 (m, 1H), 1.58-1.50 (m, 1H), 1.48-1.41 (m, 2H), 0.98 (t, *J* = 7 Hz, 3H); **<sup>13</sup>C NMR** (125 MHz, CDCl<sub>3</sub>): δ 148.5, 130.0, 127.0, 126.5, 123.9, 119.2, 81.3, 77.6, 73.0, 36.5, 30.4, 27.4, 22.2, 13.9 ppm. HRMS (EI+) calcd for [C<sub>14</sub>H<sub>16</sub>Cl<sub>2</sub>N<sub>2</sub>O<sub>5</sub>]<sup>+</sup> m/z 362.0436, found 362.0416.

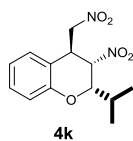

(*2S,3S,4S*)-2-isopropyl-3-nitro-4-(nitromethyl)chromane, white solid, mp 104-106 °C, 65% yield, >99% ee, >20:1 dr. The enantiomeric excess was determined by HPLC on Daicel Chiralpak AS-H with hexane/*i*-PrOH (90:10) as the eluent, flow = 1.0 mL/min, UV = 212 nm,  $[\alpha]_D^{22} = -105.000$  (c = 0.08 in CH<sub>2</sub>Cl<sub>2</sub>). **<sup>1</sup>H NMR** (500 MHz, CDCl<sub>3</sub>): δ 7.29-7.23 (m, 2H), 7.08-7.05 (m, 1H), 6.97 (dd, *J* = 8, 1 Hz, 1H), 5.15 (t, *J* = 1.5 Hz, 1H), 4.82 (dd, *J* = 13.5, 4 Hz, 1H), 4.55 (dd, *J* = 13, 1 Hz, 1H), 4.25 (dd, *J* = 11, 4 Hz, 1H), 3.60 (dd, *J* = 10, 1.5 Hz, 1H), 2.17-2.10 (m, 1H), 1.25 (d, *J* = 6.5 Hz, 3H), 1.18 (d, *J* = 7 Hz, 3H); **<sup>13</sup>C NMR** (125 MHz, CDCl<sub>3</sub>): δ 154.4, 129.5, 128.6, 122.5, 117.7, 116.3, 79.4, 78.6, 76.8, 37.2, 29.4, 19.6, 18.3 ppm. HRMS (EI+) calcd for [C<sub>13</sub>H<sub>16</sub>N<sub>2</sub>O<sub>5</sub>]<sup>+</sup> m/z 280.1059, found 280.1056.

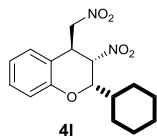

**(2S,3S,4S)-2-cyclohexyl-3-nitro-4-(nitromethyl)chromane**, white solid, mp 162-164 °C, 70% yield, 89% ee, >20:1 dr. The enantiomeric excess was determined by HPLC on Daicel Chiralpak AS-H with hexane/*i*-PrOH (90:10) as the eluent, flow = 1.0 mL/min, UV = 212 nm,  $[\alpha]_D^{22} = 101.761$  (c = 1 in CH<sub>2</sub>Cl<sub>2</sub>). **<sup>1</sup>H NMR** (500 MHz, CDCl<sub>3</sub>): δ 7.28-7.22 (m, 2H), 7.05 (t, *J* = 7.5 Hz, 1H), 6.95 (d, *J* = 8.5 Hz, 1H), 5.15 (s, 1H), 4.81 (dd, *J* = 13.5, 4 Hz, 1H), 4.53 (dd, *J* = 12, 11 Hz, 1H), 4.23 (dd, *J* = 11, 5 Hz, 1H), 3.70 (d, *J* = 10 Hz, 1H), 2.38 (d, *J* = 12.5 Hz, 1H), 2.10-2.06 (m, 1H), 1.88-1.81 (m, 3H), 1.78-1.74 (m, 1H), 1.42-1.20 (m, 3H), 1.17-1.01 (m, 2H); **<sup>13</sup>C NMR** (125 MHz, CDCl<sub>3</sub>): δ 154.5, 129.5, 128.7, 122.4, 117.7, 116.4, 78.9, 78.6, 76.5, 38.1, 37.2, 29.8, 28.3, 26.1, 25.4, 25.3 ppm. HRMS (EI<sup>+</sup>) calcd for [C<sub>16</sub>H<sub>20</sub>N<sub>2</sub>O<sub>5</sub>]<sup>+</sup> m/z 320.1372, found 320.1354.

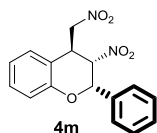

**(2S,3S,4S)-3-nitro-4-(nitromethyl)-2-phenylchromane**, white solid, mp 165-168 °C, 60% yield, 94% ee, >20:1 dr. The enantiomeric excess was determined by HPLC on Daicel Chiralpak OD-H with hexane/*i*-PrOH (70:30) as the eluent, flow = 1.0 mL/min, UV = 212 nm,  $[\alpha]_D^{22} = 103.125$  (c = 0.33 in CH<sub>2</sub>Cl<sub>2</sub>). **<sup>1</sup>H NMR** (500 MHz, CDCl<sub>3</sub>): δ 7.48-7.41 (m, 5H), 7.36-7.29 (m, 1H), 7.14-7.32 (m, 1H), 7.31-7.29 (m, 2H), 5.36 (d, *J* = 4 Hz, 1H), 5.24 (t, *J* = 4 Hz, 1H), 4.92 (dd, *J* = 14, 4 Hz, 1H), 4.79 (dd, *J* = 13.5, 10.5 Hz, 1H), 4.29-4.25 (m, 1H); **<sup>13</sup>C NMR** (125 MHz, CDCl<sub>3</sub>): δ 154.0, 134.5, 129.8, 129.3, 128.9 (×2), 128.5, 125.6 (×2), 122.8, 118.1, 115.8, 84.1, 78.4, 73.3, 37.0 ppm; HRMS (EI<sup>+</sup>) calcd for [C<sub>16</sub>H<sub>14</sub>N<sub>2</sub>O<sub>5</sub>]<sup>+</sup> m/z 314.0903, found 314.0910.

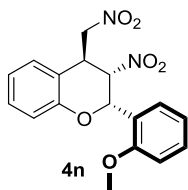

**(2*S*,3*S*,4*S*)-2-(2-methoxyphenyl)-3-nitro-4-(nitromethyl)chromane**, white solid, mp 190-192 °C, 63% yield, 95% ee, >20:1 dr. The enantiomeric excess was determined by HPLC on Daicel Chiralpak OD-H with hexane/*i*-PrOH (80:20) as the eluent, flow = 1.0 mL/min, UV = 212 nm,  $[\alpha]_D^{22} = 166.667$  ( $c = 0.12$  in  $\text{CH}_2\text{Cl}_2$ ). **<sup>1</sup>H NMR** (500 MHz,  $\text{CDCl}_3$ ):  $\delta$  7.58-7.56 (m, 1H), 7.43-7.39 (m, 1H), 7.34-7.28 (m, 2H), 7.13-7.07 (m, 3H), 6.98 (dd,  $J = 8.5, 1.5$  Hz, 1H), 5.57 (s, 1H), 5.39-5.38 (m, 1H), 4.91 (dd,  $J = 13.5, 4$  Hz, 1H), 4.79 (dd,  $J = 14, 11.5$  Hz, 1H), 4.48 (dd,  $J = 11, 4$  Hz, 1H), 3.93 (s, 3H); **<sup>13</sup>C NMR** (125 MHz,  $\text{CDCl}_3$ ):  $\delta$  155.0, 154.6, 129.9, 129.5, 128.9, 126.5, 122.8, 122.7, 121.1, 118.0, 116.7, 109.9, 81.0, 78.6, 69.3, 55.4, 37.4 ppm; HRMS (EI<sup>+</sup>) calcd for  $[\text{C}_{17}\text{H}_{16}\text{N}_2\text{O}_6]^+$   $m/z$  348.1008, found 348.1008.

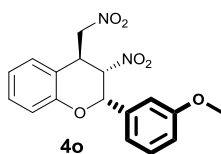

**(2*S*,3*S*,4*S*)-2-(3-methoxyphenyl)-3-nitro-4-(nitromethyl)chromane**, white solid, mp 193-195 °C, 66% yield, >99% ee, >20:1 dr. The enantiomeric excess was determined by HPLC on Daicel Chiralpak OD-H with hexane/*i*-PrOH (70:30) as the eluent, flow = 1.0 mL/min, UV = 212 nm,  $[\alpha]_D^{22} = 153.274$  ( $c = 0.18$  in  $\text{CH}_2\text{Cl}_2$ ). **<sup>1</sup>H NMR** (500 MHz,  $\text{CDCl}_3$ ):  $\delta$  7.39-7.32 (m, 2H), 7.30-7.28 (m, 1H), 7.17-7.10 (m, 2H), 7.01-6.94 (m, 3H), 5.33 (d,  $J = 2.5$ , 1H), 5.24 (dd,  $J = 2.5, 1.5$  Hz, 1H), 4.91 (dd,  $J = 13.5, 4$  Hz, 1H), 4.79 (dd,  $J = 14, 10$  Hz, 1H), 4.28-4.25 (m, 1H), 3.84 (s, 3H); **<sup>13</sup>C NMR** (125 MHz,  $\text{CDCl}_3$ ):  $\delta$  160.0, 154.0, 136.0, 130.0, 129.8, 128.5, 122.8, 118.1, 117.8, 115.9, 114.6, 111.5, 84.0, 78.4, 73.1, 55.4, 37.0 ppm; HRMS (EI<sup>+</sup>) calcd for  $[\text{C}_{17}\text{H}_{16}\text{N}_2\text{O}_6]^+$   $m/z$  348.1008, found 348.1006.

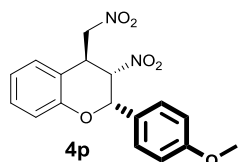

(*2S,3S,4S*)-2-(4-methoxyphenyl)-3-nitro-4-(nitromethyl)chromane, white solid, mp 198-190 °C, 67% yield, >99% ee, >20:1 dr. The enantiomeric excess was determined by HPLC on Daicel Chiralpak OD-H with hexane/*i*-PrOH (80:20) as the eluent, flow = 1.0 mL/min, UV = 212 nm,  $[\alpha]_D^{22} = 147.513$  ( $c = 0.22$  in CH<sub>2</sub>Cl<sub>2</sub>). **<sup>1</sup>H NMR** (500 MHz, CDCl<sub>3</sub>): δ 7.35-7.29 (m, 4H), 7.13-7.08 (m, 2H), 6.98-6.95 (m, 2H), 5.33 (d,  $J = 3.5$  Hz, 1H), 5.20 (t,  $J = 2.5$  Hz, 1H), 4.91 (dd,  $J = 13.5, 4$  Hz, 1H), 4.79 (dd,  $J = 14, 10$  Hz, 1H), 4.27-4.23 (m, 1H), 3.85 (s, 3H); **<sup>13</sup>C NMR** (125 MHz, CDCl<sub>3</sub>): δ 154.2, 129.8, 128.5, 127.0 (×2), 126.4, 122.7, 118.1, 115.9, 114.4 (×2), 84.5, 78.4, 73.2, 55.3, 37.0, 29.7 ppm; HRMS (EI+) calcd for [C<sub>17</sub>H<sub>16</sub>N<sub>2</sub>O<sub>6</sub>]<sup>+</sup>  $m/z$  348.1008, found 348.1008.

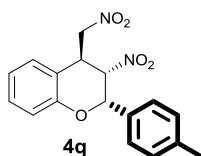

(*2S,3S,4S*)-3-nitro-4-(nitromethyl)-2-(*p*-tolyl)chromane, white solid, mp 166-168 °C, 58% yield, >99% ee, >20:1 dr. The enantiomeric excess was determined by HPLC on Daicel Chiralpak OD-H with hexane/*i*-PrOH (80:20) as the eluent, flow = 1.0 mL/min, UV = 230 nm,  $[\alpha]_D^{22} = 124.763$  ( $c = 0.16$  in CH<sub>2</sub>Cl<sub>2</sub>). **<sup>1</sup>H NMR** (500 MHz, CDCl<sub>3</sub>): δ 7.35-7.25 (m, 6H), 7.13-7.09 (m, 2H), 5.34 (d,  $J = 2$  Hz, 1H), 5.21 (t,  $J = 2$  Hz, 1H), 4.91 (dd,  $J = 13.5, 4$  Hz, 1H), 4.79 (dd,  $J = 14, 10$  Hz, 1H), 4.27-4.24 (m, 1H), 2.40 (s, 3H); **<sup>13</sup>C NMR** (125 MHz, CDCl<sub>3</sub>): δ 154.1, 139.2, 131.4, 129.8 (×2), 129.6, 128.5, 125.5 (×2), 122.7, 118.1, 115.8, 84.1, 78.4, 73.3, 37.0, 21.3 ppm; HRMS (EI+) calcd for [C<sub>17</sub>H<sub>16</sub>N<sub>2</sub>O<sub>5</sub>]<sup>+</sup>  $m/z$  328.1059, found 328.1062.

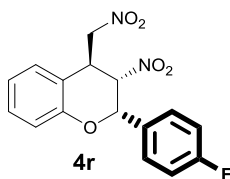

**(2S,3S,4S)-2-(4-fluorophenyl)-3-nitro-4-(nitromethyl)chromane**, white solid, mp 135-137 °C, 69% yield, 93% ee, 13:1 dr. The enantiomeric excess was determined by HPLC on Daicel Chiralpak OD-H with hexane/*i*-PrOH (70:30) as the eluent, flow = 1.0 mL/min, UV = 212 nm,  $[\alpha]_D^{22} = 114.513$  ( $c = 0.58$  in  $\text{CH}_2\text{Cl}_2$ ). **<sup>1</sup>H NMR** (500 MHz,  $\text{CDCl}_3$ ):  $\delta$  7.41-7.38 (m, 2H), 7.35-7.32 (m, 1H), 7.14-7.10 (m, 3H), 7.05 (dd,  $J = 16, 8.5$  Hz, 2H), 5.68 (d,  $J = 7$  Hz, 1H), 5.26 (dd,  $J = 7.5, 4.5$  Hz, 1H), 5.03 (dd,  $J = 14.5, 7.5$  Hz, 1H), 4.92 (dd,  $J = 14.5, 6$  Hz, 1H), 4.32 (m,  $J = 12, 6$  Hz, 1H); **<sup>13</sup>C NMR** (125 MHz,  $\text{CDCl}_3$ ):  $\delta$  162.1, 153.9, 130.3, 129.9, 128.5, 127.6, 127.5, 123.0, 118.1, 116.1, 116.0, 115.8, 84.0, 78.4, 72.8, 37.0 ppm; HRMS (EI+) calcd for  $[\text{C}_{16}\text{H}_{13}\text{FN}_2\text{O}_6]^+$   $m/z$  332.0808, found 332.0804.

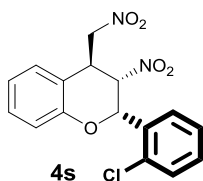

**(2S,3S,4S)-2-(2-chlorophenyl)-3-nitro-4-(nitromethyl)chromane**, white solid, mp 157-159 °C, 61% yield, 96% ee, >20:1 dr. The enantiomeric excess was determined by HPLC on Daicel Chiralpak AS-H with hexane/*i*-PrOH (90:10) as the eluent, flow = 1.0 mL/min, UV = 212 nm  $[\alpha]_D^{22} = 111.000$  ( $c = 1$  in  $\text{CH}_2\text{Cl}_2$ ). **<sup>1</sup>H NMR** (500 MHz,  $\text{CDCl}_3$ ):  $\delta$  7.65-7.63 (m, 1H), 7.49-7.47 (m, 1H), 7.43-7.39 (m, 2H), 7.35-7.31 (m, 2H), 7.16-7.13 (m, 1H), 7.08 (dd,  $J = 8, 1.5$  Hz, 1H), 5.62 (d,  $J = 2$  Hz, 1H), 5.45 (dd,  $J = 2, 1$  Hz, 1H), 4.91 (dd,  $J = 14, 4$  Hz, 1H), 4.82 (dd,  $J = 14, 11$  Hz, 1H), 4.41 (dd,  $J = 11, 4$  Hz, 1H); **<sup>13</sup>C NMR** (125 MHz,  $\text{CDCl}_3$ ):  $\delta$  154.1, 132.1, 130.8, 130.4, 129.6, 129.5, 128.9, 127.9, 127.6, 123.1, 118.0, 116.5, 81.5, 78.1, 70.8, 37.3 ppm; HRMS (EI+) calcd for  $[\text{C}_{16}\text{H}_{13}\text{ClN}_2\text{O}_6]^+$   $m/z$  348.0513, found 348.0516.

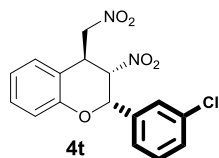

(*2S,3S,4S*)-2-(3-chlorophenyl)-3-nitro-4-(nitromethyl)chromane, white solid, mp 143-145 °C, 58% yield, >99% ee, >20:1 dr. The enantiomeric excess was determined by HPLC on Daicel Chiralpak OD-H with hexane/*i*-PrOH (80:20) as the eluent, flow = 1.0 mL/min, UV = 212 nm,  $[\alpha]_D^{22} = 73.333$  (c = 0.15 in CH<sub>2</sub>Cl<sub>2</sub>). <sup>1</sup>H NMR (500 MHz, CDCl<sub>3</sub>): δ 7.48-7.46 (m, 1H), 7.41-7.40 (m, 2H), 7.36-7.29 (m, 3H), 7.15-7.10 (m, 2H), 5.32 (d, *J* = 2.5 Hz, 1H), 5.23 (dd, *J* = 4.5, 1.5 Hz, 1H), 4.92 (dd, *J* = 13.5, 4 Hz, 1H), 4.78 (dd, *J* = 13.5, 9.5 Hz, 1H), 4.31-4.28 (m, 1H); <sup>13</sup>C NMR (125 MHz, CDCl<sub>3</sub>): δ 153.7, 136.2, 135.0, 130.2, 129.9, 129.4, 128.6, 125.9, 123.7, 123.1, 118.8, 115.7, 83.8, 78.4, 72.5, 37.0 ppm; HRMS (EI+) calcd for [C<sub>16</sub>H<sub>13</sub>ClN<sub>2</sub>O<sub>6</sub>]<sup>+</sup> m/z 348.0513, found m/z 348.0528.

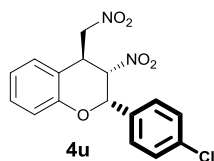

(*2S,3S,4S*)-2-(4-chlorophenyl)-3-nitro-4-(nitromethyl)chromane, white solid, mp 139-141 °C, 57% yield, 92% ee, >20:1 dr. The enantiomeric excess was determined by HPLC on Daicel Chiralpak OD-H with hexane/*i*-PrOH (70:30) as the eluent, flow = 1.0 mL/min, UV = 212 nm,  $[\alpha]_D^{22} = 98.215$  (c = 1 in CH<sub>2</sub>Cl<sub>2</sub>). <sup>1</sup>H NMR (500 MHz, CDCl<sub>3</sub>): δ 7.44-7.39 (m, 4H), 7.32-7.3 (m, 1H), 7.27-7.25 (m, 1H), 7.12-7.09 (m, 1H), 7.03 (dd, *J* = 8.5, 1.5 Hz, 1H), 5.42 (t, *J* = 9 Hz, 1H), 5.31 (d, *J* = 9 Hz, 1H), 4.84 (dd, *J* = 14.5, 8.5 Hz, 1H), 4.69 (dd, *J* = 14.5, 11 Hz, 1H), 4.49-4.45 (m, 1H); <sup>13</sup>C NMR (125 MHz, CDCl<sub>3</sub>): δ 153.8, 136.0, 133.0, 129.8, 129.4 (×2), 128.5 (×2), 126.6, 123.2, 118.1, 117.4, 86.8, 77.9, 74.7, 39.1 ppm; HRMS (EI+) calcd for [C<sub>16</sub>H<sub>13</sub>ClN<sub>2</sub>O<sub>6</sub>]<sup>+</sup> m/z 348.0513, found 348.0524.

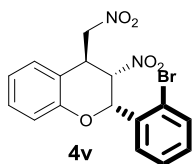

(*2S,3S,4S*)-2-(2-bromophenyl)-3-nitro-4-(nitromethyl)chromane, white solid, mp 175-177 °C, 65% yield, 87% ee, >20:1 dr. The enantiomeric excess was determined by HPLC on Daicel Chiralpak OD-H with hexane/*i*-PrOH (80:20) as the eluent, flow = 1.0 mL/min, UV = 212 nm,  $[\alpha]_D^{22} = 127.434$  ( $c = 0.83$  in CH<sub>2</sub>Cl<sub>2</sub>). **<sup>1</sup>H NMR** (500 MHz, CDCl<sub>3</sub>): δ 7.67 (dd,  $J = 8, 1.5$  Hz, 1H), 7.62 (dd,  $J = 7.5, 1.5$  Hz, 1H), 7.47-7.43 (m, 1H), 7.35-7.32 (m, 3H), 7.16-7.13 (m, 1H), 7.08 (dd,  $J = 8, 1$  Hz, 1H), 5.58 (d,  $J = 1.5$  Hz, 1H), 5.49 (dd,  $J = 2, 1$  Hz, 1H), 4.93-4.85 (m, 2H), 4.42 (dd,  $J = 10, 5$  Hz, 1H); **<sup>13</sup>C NMR** (125 MHz, CDCl<sub>3</sub>): δ 154.2, 133.5, 132.8, 130.8, 129.6, 128.9, 128.4, 128.2, 123.1, 120.8, 118.0, 116.6, 81.5, 78.0, 73.0, 37.4 ppm; HRMS (EI+) calcd for [C<sub>16</sub>H<sub>13</sub>BrN<sub>2</sub>O<sub>5</sub>]<sup>+</sup>  $m/z$  392.0008, found  $m/z$  392.0017.

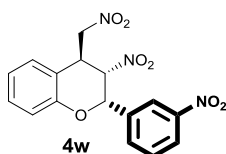

(*2S,3S,4S*)-3-nitro-4-(nitromethyl)-2-(3-nitrophenyl)chromane, white solid, mp 131-134 °C, 67% yield, 94% ee, >20:1 dr. The enantiomeric excess was determined by HPLC on Daicel Chiralpak OD-H with hexane/*i*-PrOH (80:20) as the eluent, flow = 1.0 mL/min, UV = 212 nm,  $[\alpha]_D^{22} = 136.000$  ( $c = 1$  in CH<sub>2</sub>Cl<sub>2</sub>). **<sup>1</sup>H NMR** (500 MHz, CDCl<sub>3</sub>): δ 8.38 (t,  $J = 2$  Hz, 1H), 8.32-8.29 (m, 1H), 7.83-7.81 (m, 1H), 7.68 (t,  $J = 3$  Hz, 1H), 7.39-7.32 (m, 2H), 7.19-7.13 (m, 2H), 5.46 (d,  $J = 2$  Hz, 1H), 5.32 (dd,  $J = 2.5, 1.5$  Hz, 1H), 4.97 (dd,  $J = 14, 4$  Hz, 1H), 4.84 (dd,  $J = 13.5, 10.5$  Hz, 1H), 4.37 (dd,  $J = 10, 4$  Hz, 1H); **<sup>13</sup>C NMR** (125 MHz, CDCl<sub>3</sub>): δ 153.4, 148.6, 136.9, 131.6, 130.0 (×2), 128.7, 124.1, 123.4, 121.0, 118.2, 115.7, 83.7, 78.4, 72.3, 36.9 ppm.

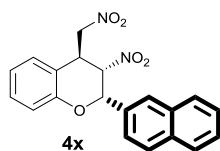

(*2S,3S,4S*)-2-(*naphthalen-2-yl*)-3-nitro-4-(*nitromethyl*)chromane, white solid, mp 172-175 °C, 57% yield, >99% ee, >20:1 dr. The enantiomeric excess was determined by HPLC on Daicel Chiralpak OD-H with hexane/*i*-PrOH (80:20) as the eluent, flow = 1.0 mL/min, UV = 212 nm,  $[\alpha]_D^{22} = 125.000$  ( $c = 0.08$  in  $\text{CH}_2\text{Cl}_2$ ). **<sup>1</sup>H NMR** (500 MHz,  $\text{CDCl}_3$ ):  $\delta$  7.97 (s, 1H), 7.94 (d,  $J = 8.5$  Hz, 1H), 7.1-7.88 (m, 2H), 7.56-7.54 (m, 2H), 7.47 (dd,  $J = 8.5, 2$  Hz, 1H), 7.39-7.35 (m, 1H), 7.33-7.31 (m, 1H), 7.18-7.13 (m, 2H), 5.52 (d,  $J = 2.5$  Hz, 1H), 5.35 (t,  $J = 2$  Hz, 1H), 4.95 (dd,  $J = 13.5, 4.5$  Hz, 1H), 4.84 (dd,  $J = 14, 10$  Hz, 1H), 4.34-4.31 (m, 1H); **<sup>13</sup>C NMR** (125 MHz,  $\text{CDCl}_3$ ):  $\delta$  153.1, 133.5, 133.2, 131.8, 129.8, 128.9, 128.6, 128.3, 127.9, 126.8, 126.7, 125.3, 122.9, 122.9, 118.1, 116.0, 84.0, 78.5, 73.4, 37.1 ppm. HRMS (EI+) calcd for  $[\text{C}_{20}\text{H}_{16}\text{N}_2\text{O}_5]^+$   $m/z$  364.1059, found 364.1056.

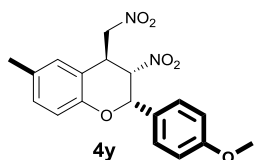

(*2S,3S,4S*)-2-(*4-methoxyphenyl*)-6-methyl-3-nitro-4-(*nitromethyl*)chromane, white solid, mp 177-179 °C, 64% yield, 96% ee, >20:1 dr. The enantiomeric excess was determined by HPLC on Daicel Chiralpak OD-H with hexane/*i*-PrOH (80:20) as the eluent, flow = 1.0 mL/min, UV = 212 nm,  $[\alpha]_D^{22} = 134.513$  ( $c = 0.5$  in  $\text{CH}_2\text{Cl}_2$ ). **<sup>1</sup>H NMR** (500 MHz,  $\text{CDCl}_3$ ):  $\delta$  7.33 (d,  $J = 8.5$  Hz, 2H), 7.12 (dd,  $J = 8, 2$  Hz, 1H), 7.07 (d,  $J = 2$  Hz, 1H), 6.98-6.95 (m, 3H), 5.28 (d,  $J = 2.5$  Hz, 1H), 5.16 (t,  $J = 2$  Hz, 1H), 4.90 (dd,  $J = 13.5, 4$  Hz, 1H), 4.76 (dd,  $J = 13.5, 10.5$  Hz, 1H), 4.22-4.19 (m, 1H), 3.84 (s, 3H), 2.35 (s, 3H); **<sup>13</sup>C NMR** (125 MHz,  $\text{CDCl}_3$ ):  $\delta$  160.2, 152.0, 132.2, 130.6, 128.6, 127.0 ( $\times 2$ ), 126.6, 117.8, 115.4, 114.3 ( $\times 2$ ), 84.2, 78.5, 73.2, 55.3, 37.0, 20.7 ppm.



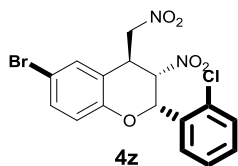

**(2S,3S,4S)-6-bromo-2-(2-chlorophenyl)-3-nitro-4-(nitromethyl)chromane,**

white solid, mp 168-170 °C, 57% yield, 86% ee, >20:1 dr. The enantiomeric excess was determined by HPLC on Daicel Chiralpak AS-H with hexane/*i*-PrOH (90:10) as the eluent, flow = 1.0 mL/min, UV = 212 nm,  $[\alpha]_D^{22} = 133.125$  ( $c = 0.5$  in  $\text{CH}_2\text{Cl}_2$ ). **<sup>1</sup>H NMR** (500 MHz,  $\text{CDCl}_3$ ):  $\delta$  7.60-7.58 (m, 1H), 7.49-7.47 (m, 2H), 7.45-7.40 (m, 3H), 6.98 (d,  $J = 8.5$  Hz, 1H), 5.60 (d,  $J = 0.5$  Hz, 1H), 5.43 (dd,  $J = 2, 1$  Hz, 1H), 4.91 (dd,  $J = 14.5, 4$  Hz, 1H), 4.81 (dd,  $J = 14, 6$  Hz, 1H), 4.39 (dd,  $J = 11, 4$  Hz, 1H); **<sup>13</sup>C NMR** (125 MHz,  $\text{CDCl}_3$ ):  $\delta$  153.3, 132.8, 131.6, 131.5, 130.8, 130.6, 129.6, 127.8, 127.7, 119.8, 118.6, 115.2, 81.0, 77.8, 71.0, 37.1 ppm.

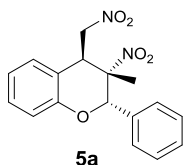

**(2S,3S,4S)-3-methyl-3-nitro-4-(nitromethyl)-2-phenylchromane,** white solid, mp 166-168 °C, 59% yield, 91% ee, 8:1 dr. The enantiomeric excess was determined by HPLC on Daicel Chiralpak AS-H with hexane/*i*-PrOH (90:10) as the eluent, flow = 1.0 mL/min, UV = 212 nm  $[\alpha]_D^{22} = 116.620$  ( $c = 0.66$  in  $\text{CH}_2\text{Cl}_2$ ). **<sup>1</sup>H NMR** (500 MHz,  $\text{CDCl}_3$ ):  $\delta$  7.41-7.29 (m, 6H), 7.21-7.18 (m, 1H), 7.10-7.00 (m, 2H), 5.77 (d,  $J = 9$  Hz, 1H), 5.18-5.12 (m, 1H), 4.93-4.88 (m, 1H), 4.17 (d,  $J = 6.5$  Hz, 1H), 1.66 (d,  $J = 7.5$  Hz, 3H); **<sup>13</sup>C NMR** (125 MHz,  $\text{CDCl}_3$ ):  $\delta$  152.3, 134.2, 130.0, 129.6, 128.7 ( $\times 2$ ), 128.3, 128.1 ( $\times 2$ ), 122.5, 118.4, 117.4, 88.4, 78.0, 77.4, 42.4, 19.4 ppm. HRMS (EI+) calcd for  $[\text{C}_{17}\text{H}_{16}\text{N}_2\text{O}_5]^+$   $m/z$  328.1059, found 328.1055.

### 3. <sup>1</sup>H, <sup>13</sup>C NMR spectra and HPLC chromatograms of compounds 4a-5a

#### <sup>1</sup>H NMR spectrum of 4a

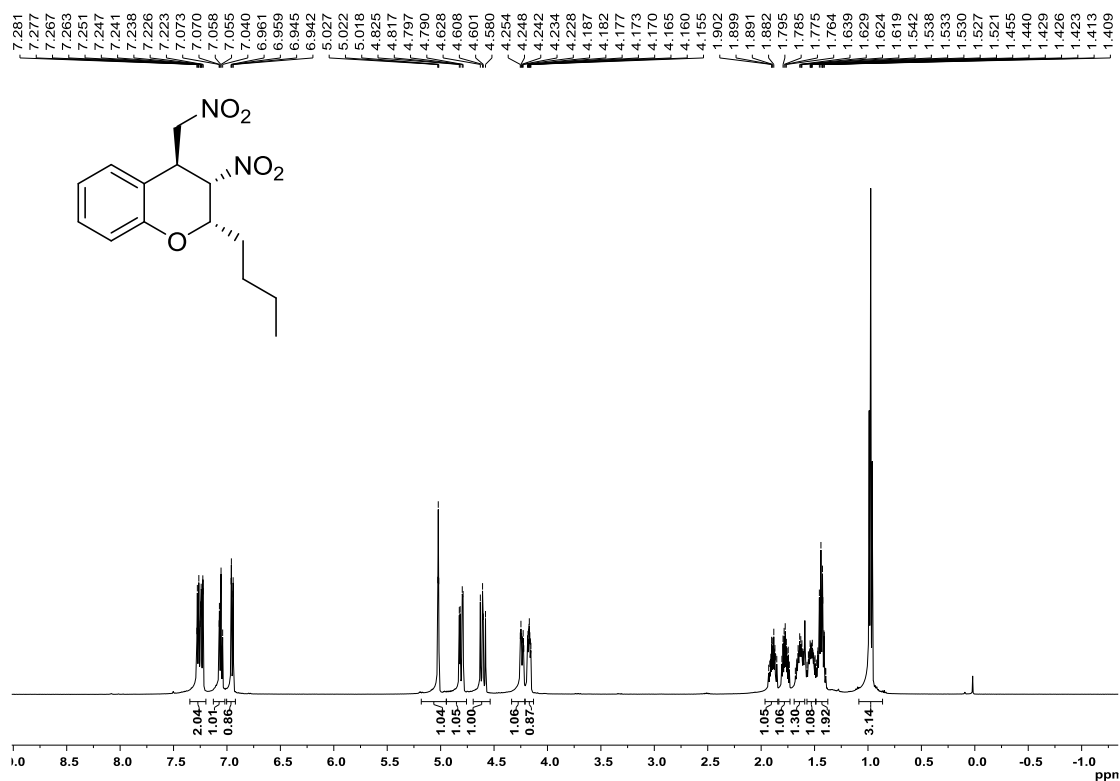

#### <sup>13</sup>C NMR spectrum of 4a

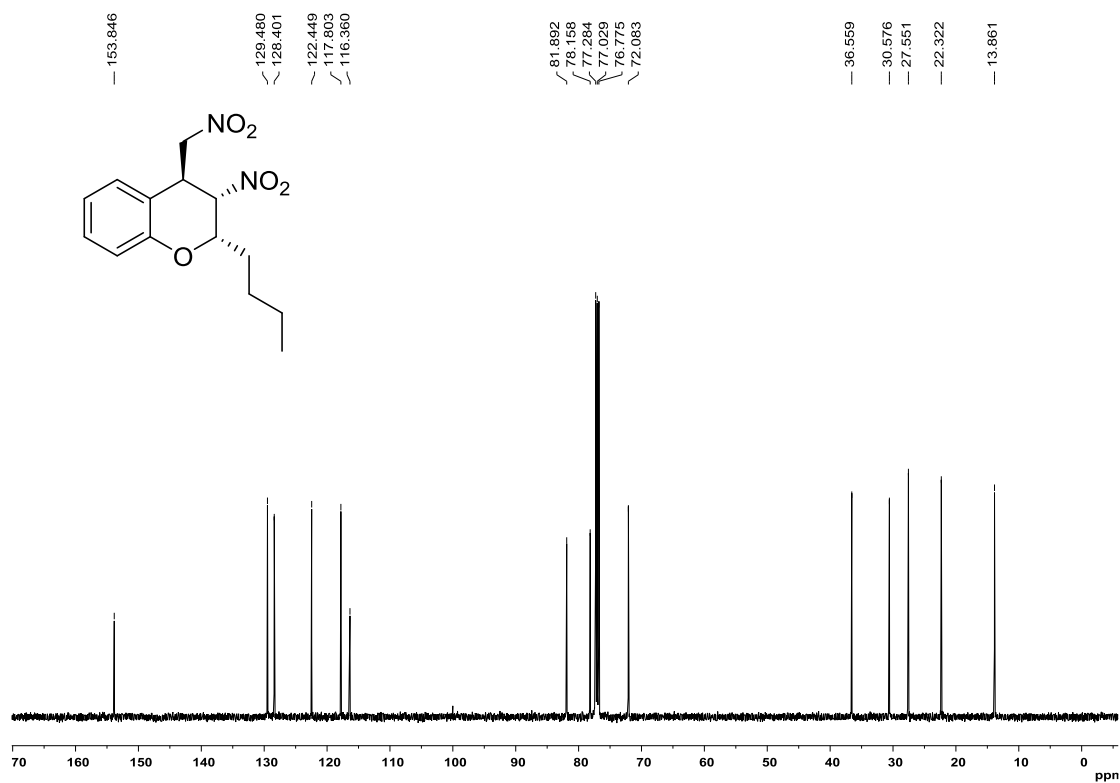

## HPLC chromatograms of 4a

### 4a-rac

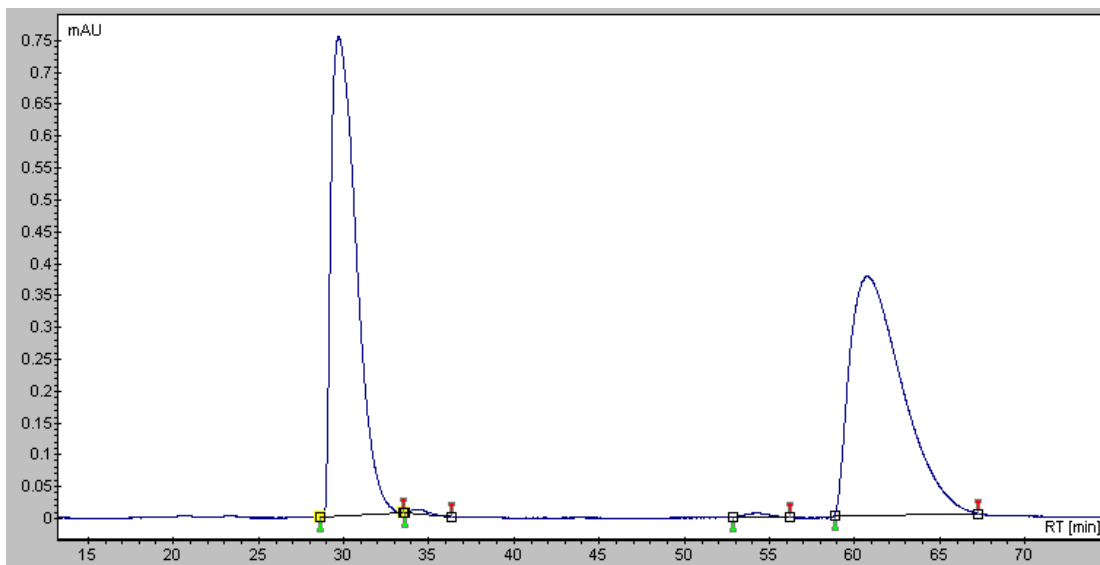

| # | Start time[min] | Time[min] | End time[min] | Area%  |
|---|-----------------|-----------|---------------|--------|
| 1 | 28.67           | 29.709    | 33.537        | 48.9   |
| 2 | 33.56           | 34.388    | 36.326        | 0.31   |
| 3 | 52.892          | 54.221    | 56.16         | 0.396  |
| 4 | 58.821          | 60.818    | 67.285        | 50.394 |

### 4a-chr

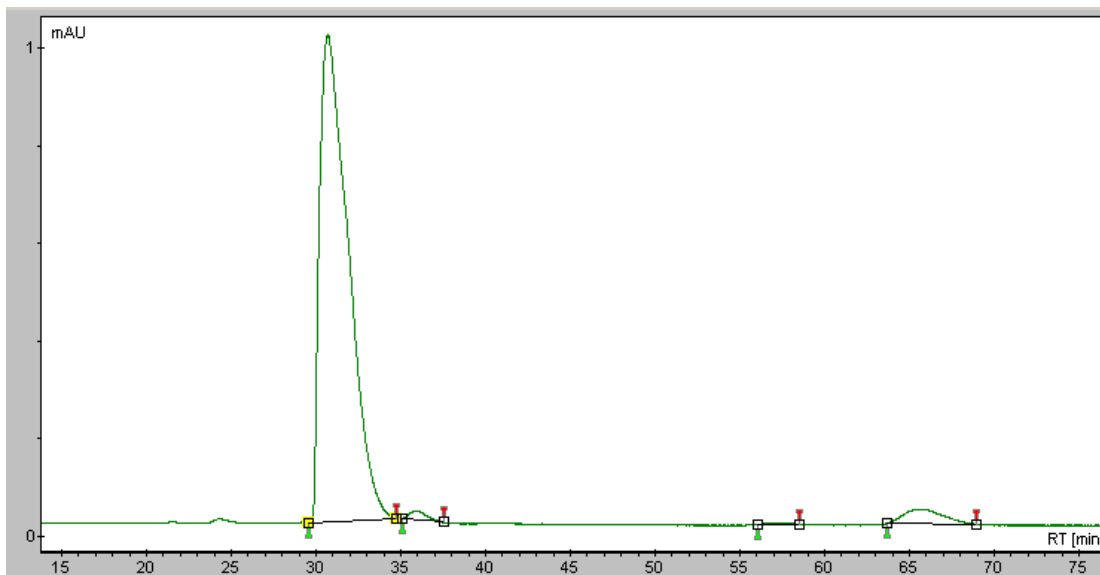

| # | Start time[min] | Time[min] | End time[min] | Area%  |
|---|-----------------|-----------|---------------|--------|
| 1 | 29.587          | 30.682    | 34.776        | 94.868 |
| 2 | 35.107          | 35.894    | 37.536        | 1.061  |
| 3 | 56.083          | 57.14     | 58.512        | 0.253  |
| 4 | 63.7            | 65.603    | 68.889        | 3.818  |

### <sup>1</sup>H NMR spectrum of 4b

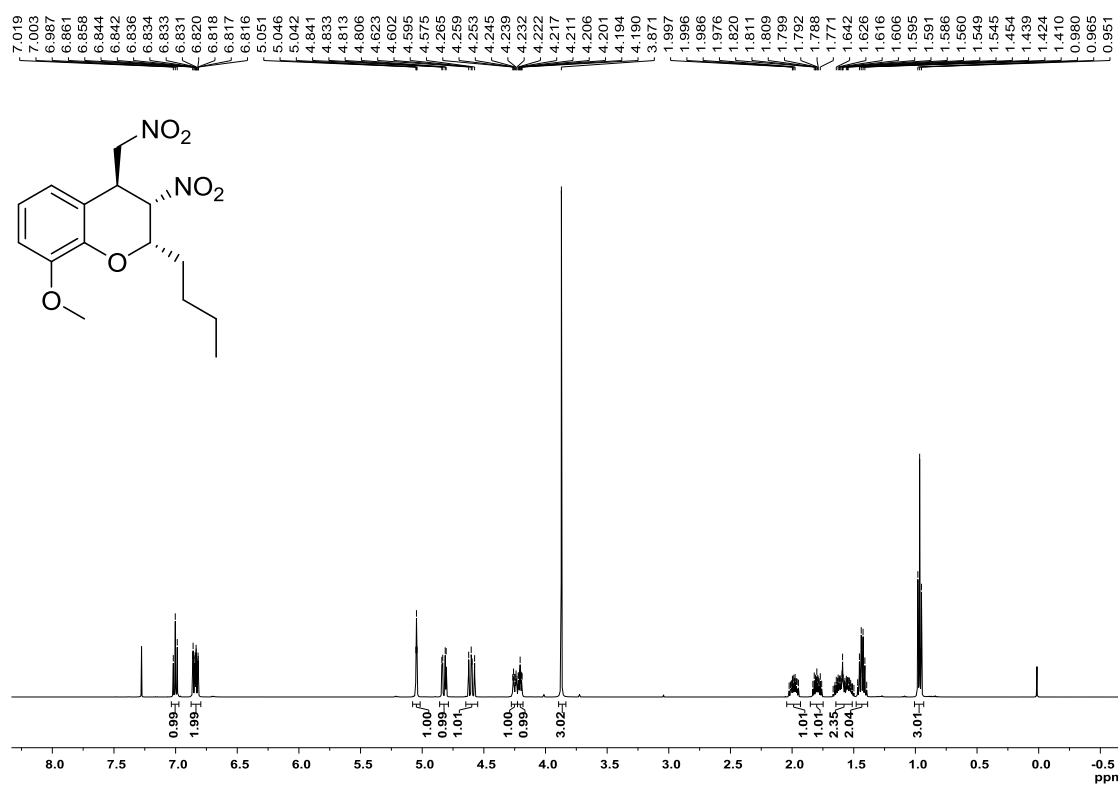

### <sup>13</sup>C NMR spectrum of 4b

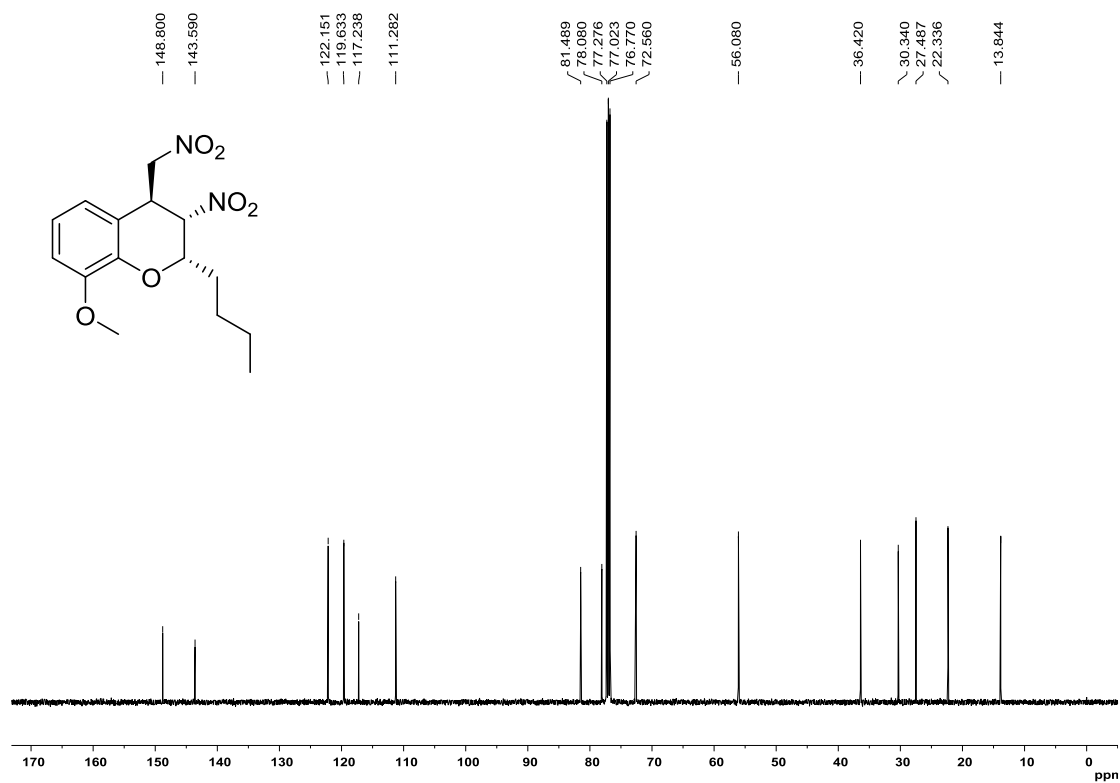

## HPLC chromatograms of 4b

### 4b-rac

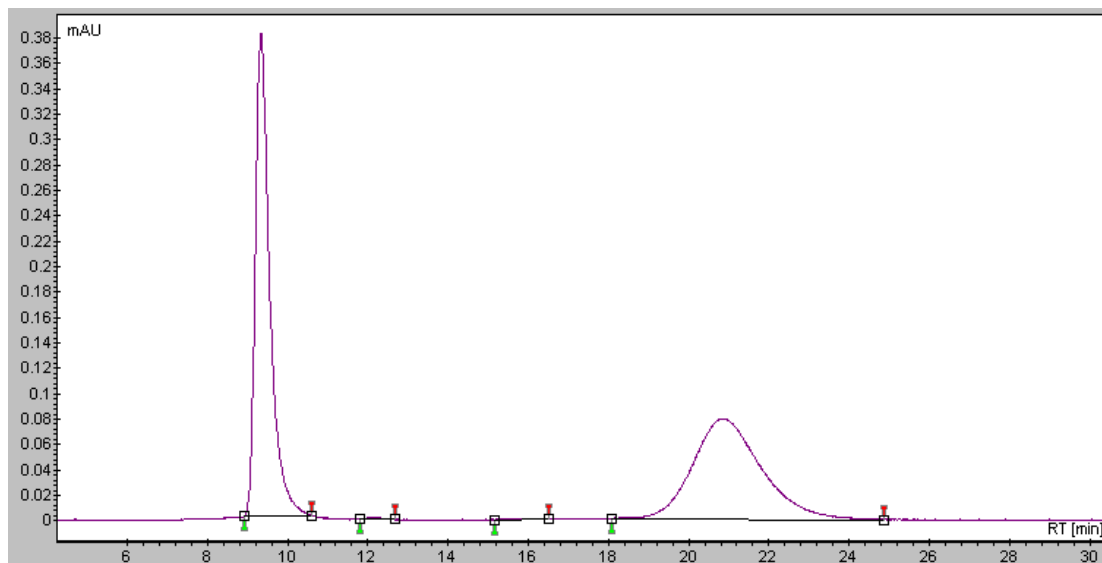

| # | Start time[min] | Time[min] | End time[min] | Area%  |
|---|-----------------|-----------|---------------|--------|
| 1 | 8.93            | 9.333     | 10.589        | 50.443 |
| 2 | 11.807          | 12.172    | 12.691        | 0.181  |
| 3 | 15.148          | 15.679    | 16.524        | 0.143  |
| 4 | 18.096          | 20.852    | 24.876        | 49.233 |

### 4b-chr

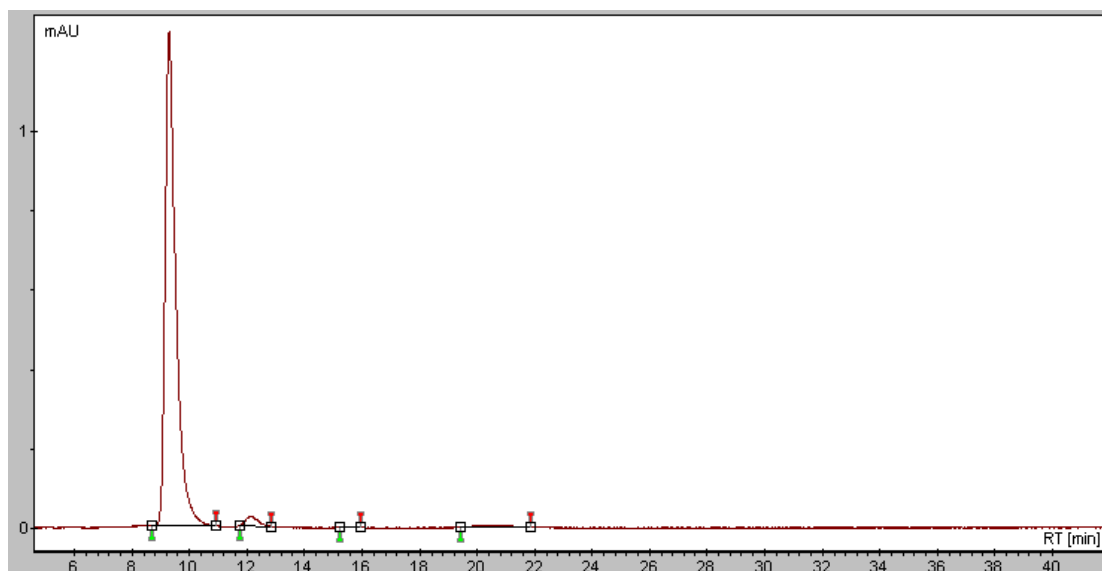

| # | Start time[min] | Time[min] | End time[min] | Area%  |
|---|-----------------|-----------|---------------|--------|
| 1 | 8.668           | 9.293     | 10.924        | 96.805 |
| 2 | 11.755          | 12.132    | 12.824        | 2.085  |
| 3 | 15.198          | 15.532    | 15.97         | 0.084  |
| 4 | 19.414          | 20.425    | 21.848        | 1.026  |

### <sup>1</sup>H NMR spectrum of 4c

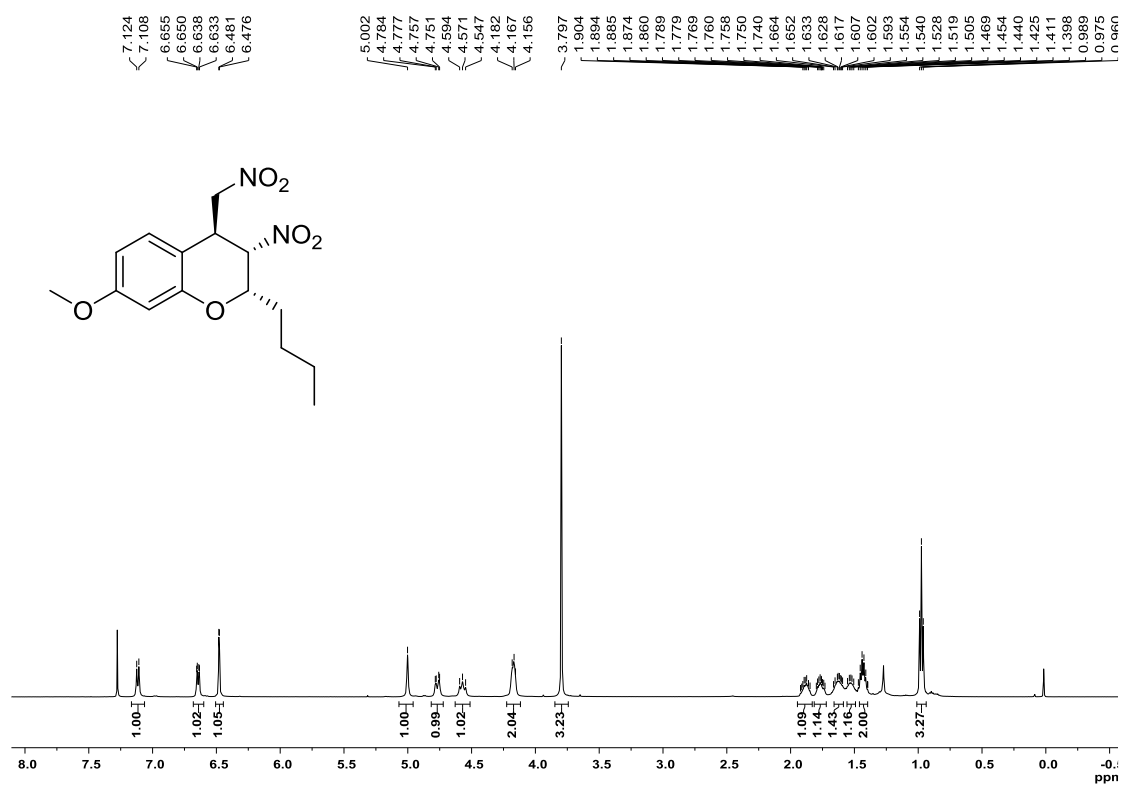

### <sup>13</sup>C NMR spectrum of 4c

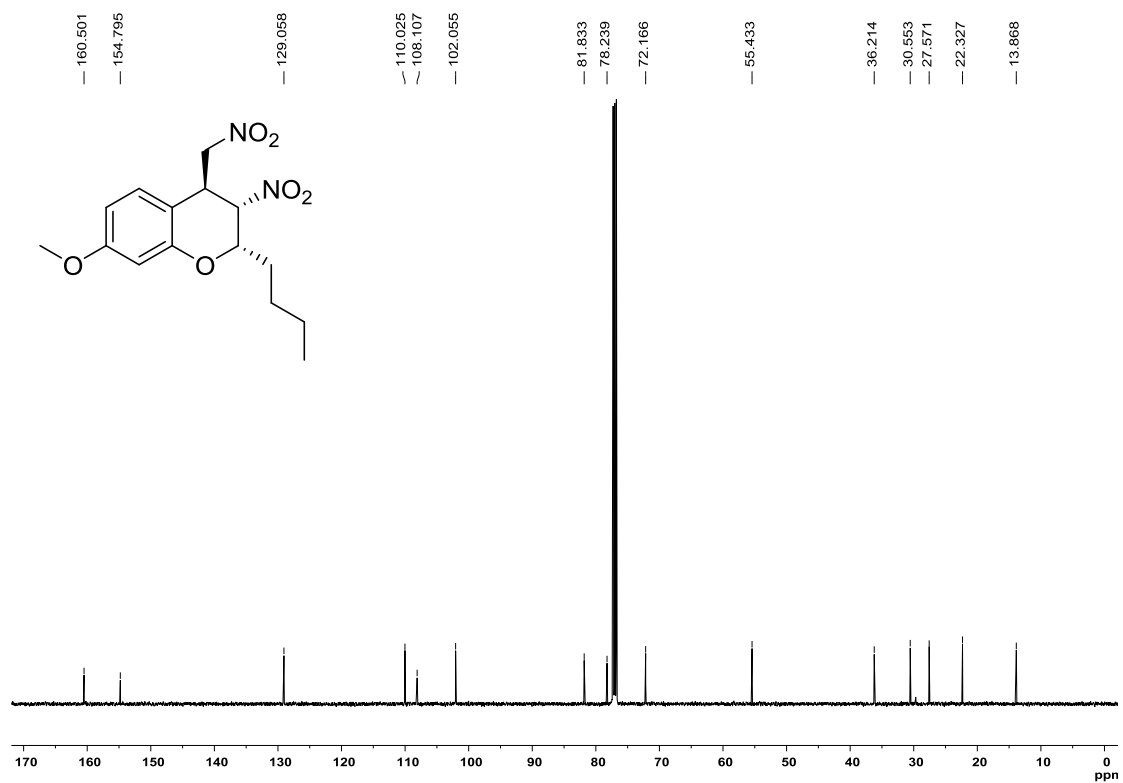

## HPLC chromatograms of 4c

### 4c-rac

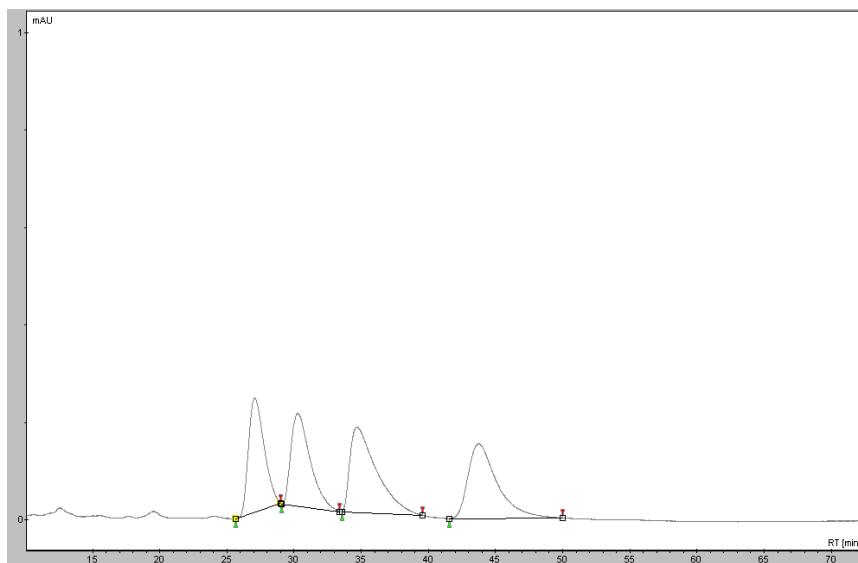

| # | Start time[min] | Time[min] | End time[min] | Area%  |
|---|-----------------|-----------|---------------|--------|
| 1 | 25.635          | 27.057    | 29.000        | 22.415 |
| 2 | 29.080          | 30.269    | 33.406        | 22.291 |
| 3 | 33.545          | 34.681    | 39.586        | 28.247 |
| 4 | 41.585          | 43.758    | 49.965        | 27.047 |

### 4c-chr

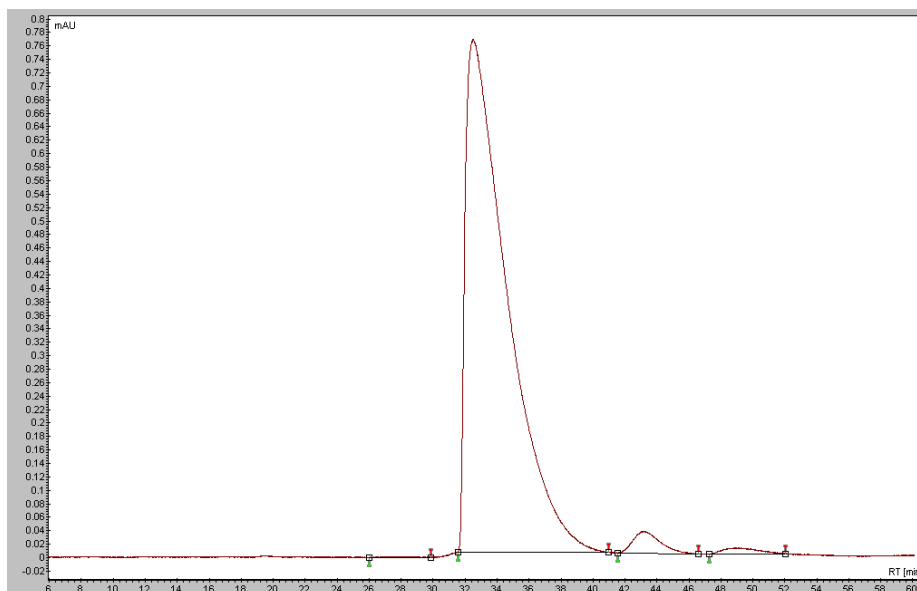

| # | Start time[min] | Time[min] | End time[min] | Area%  |
|---|-----------------|-----------|---------------|--------|
| 1 | 25.985          | 28.411    | 29.866        | 0.049  |
| 2 | 31.544          | 32.518    | 40.982        | 96.301 |
| 3 | 41.541          | 43.197    | 46.570        | 2.694  |
| 4 | 47.253          | 48.890    | 52.034        | 0.957  |

### <sup>1</sup>H NMR spectrum of 4d

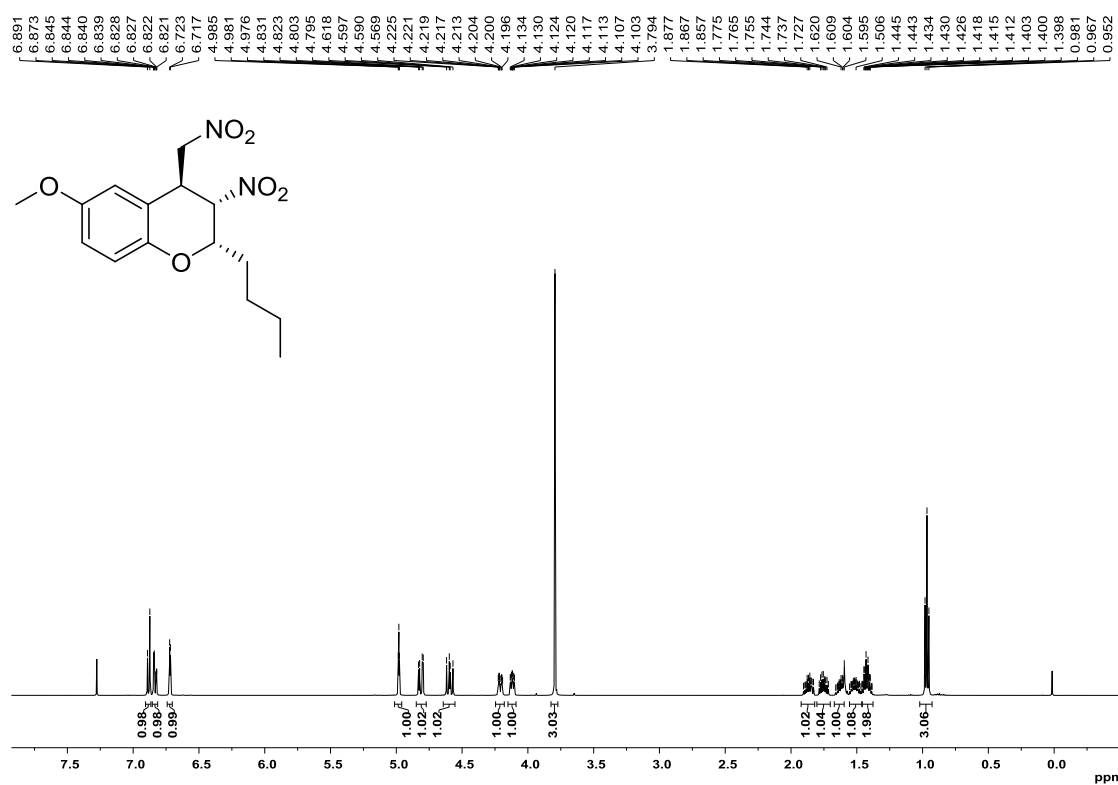

### <sup>13</sup>C NMR spectrum of 4d

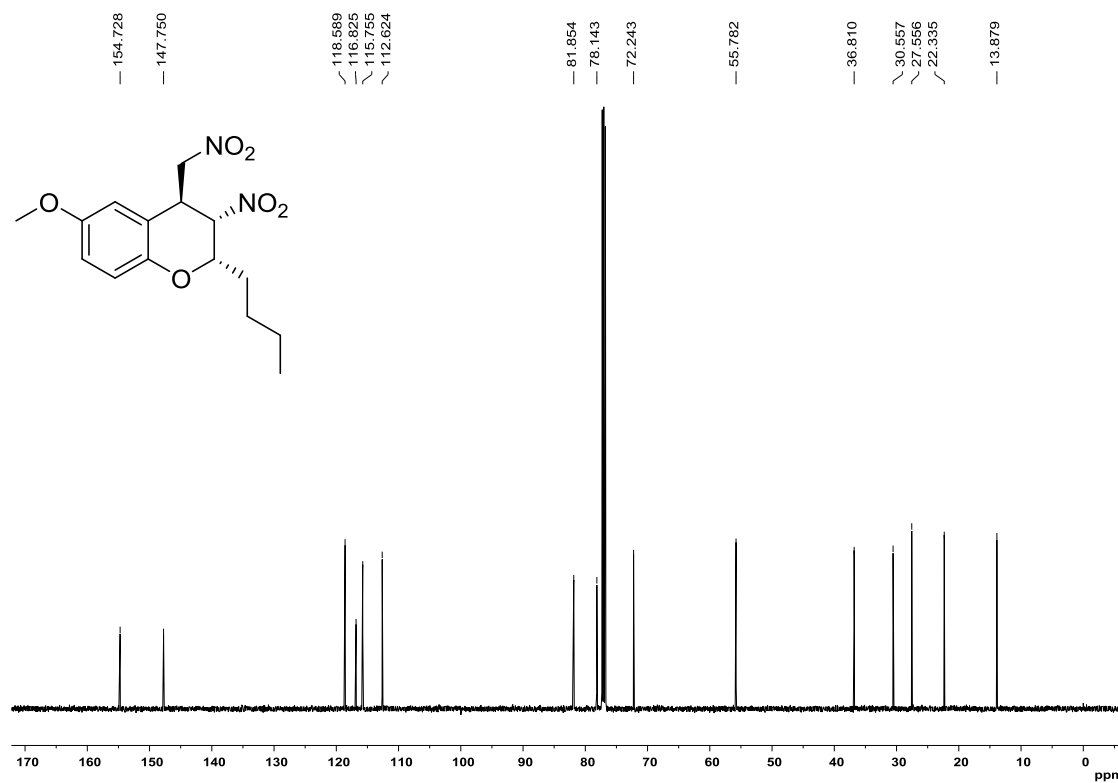



## HPLC chromatograms of 4d

### 4d-rac

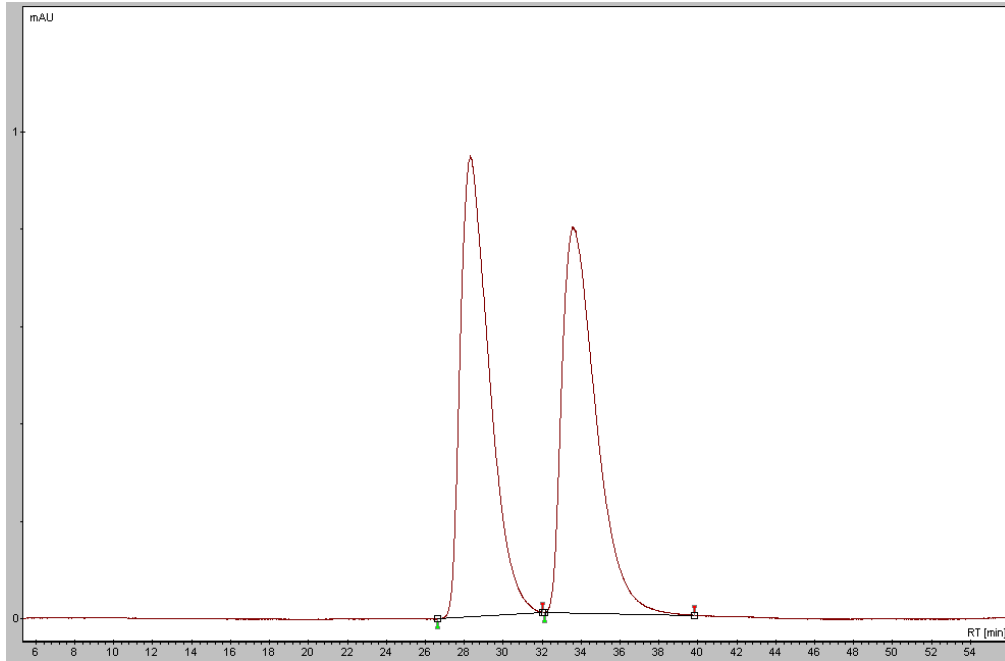

| # | Start time[min] | Time[min] | End time[min] | Area%  |
|---|-----------------|-----------|---------------|--------|
| 1 | 26.637          | 28.291    | 32.022        | 50.331 |
| 2 | 32.138          | 33.598    | 39.840        | 49.669 |

### 4d-chr

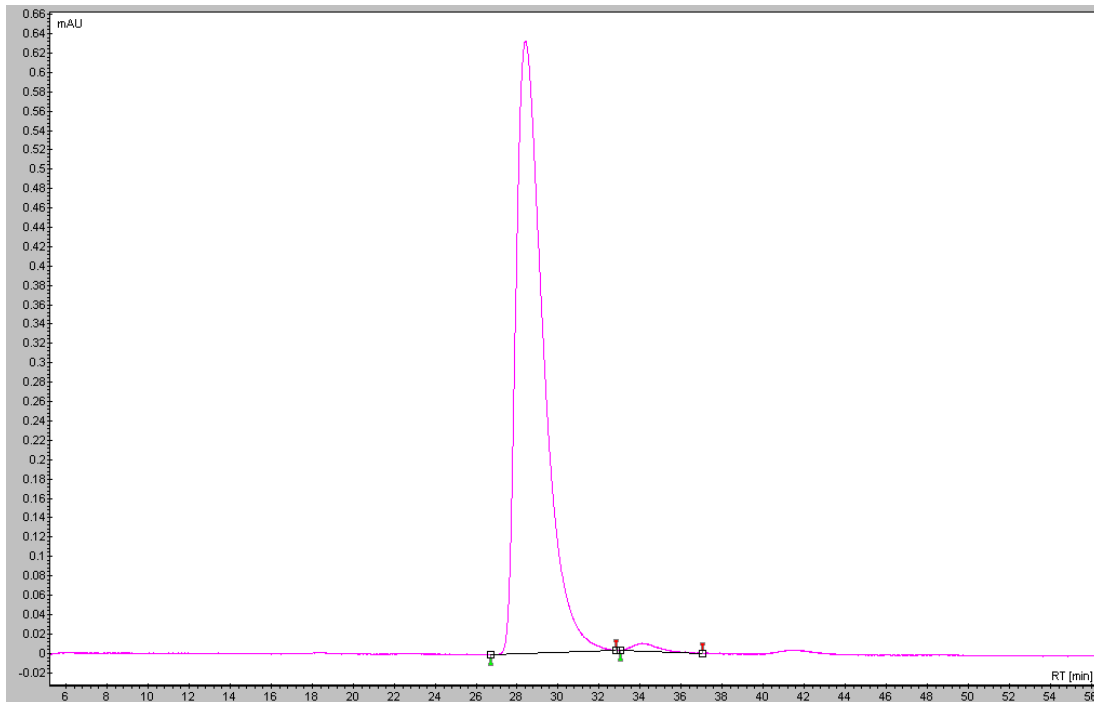

| # | Start time[min] | Time[min] | End time[min] | Area%  |
|---|-----------------|-----------|---------------|--------|
| 1 | 26.735          | 28.390    | 32.830        | 98.822 |
| 2 | 33.026          | 34.214    | 37.056        | 1.178  |

### <sup>1</sup>H NMR spectrum of 4e

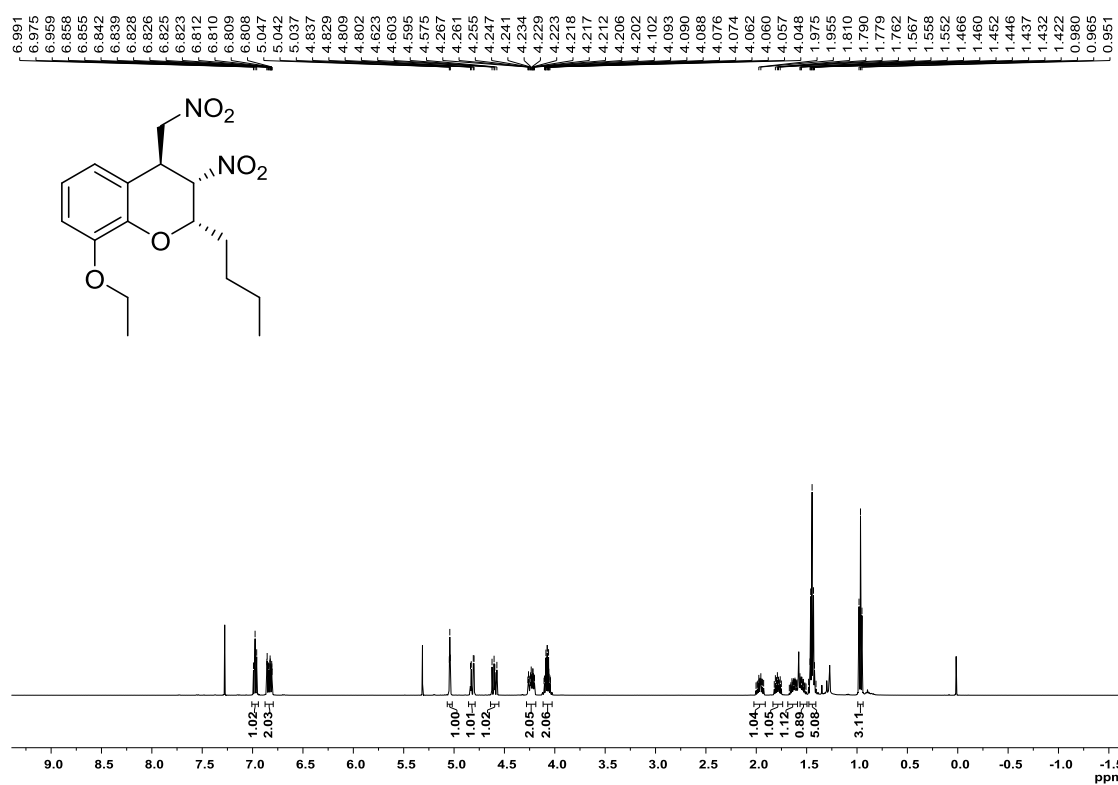

### <sup>13</sup>C NMR spectrum of 4e

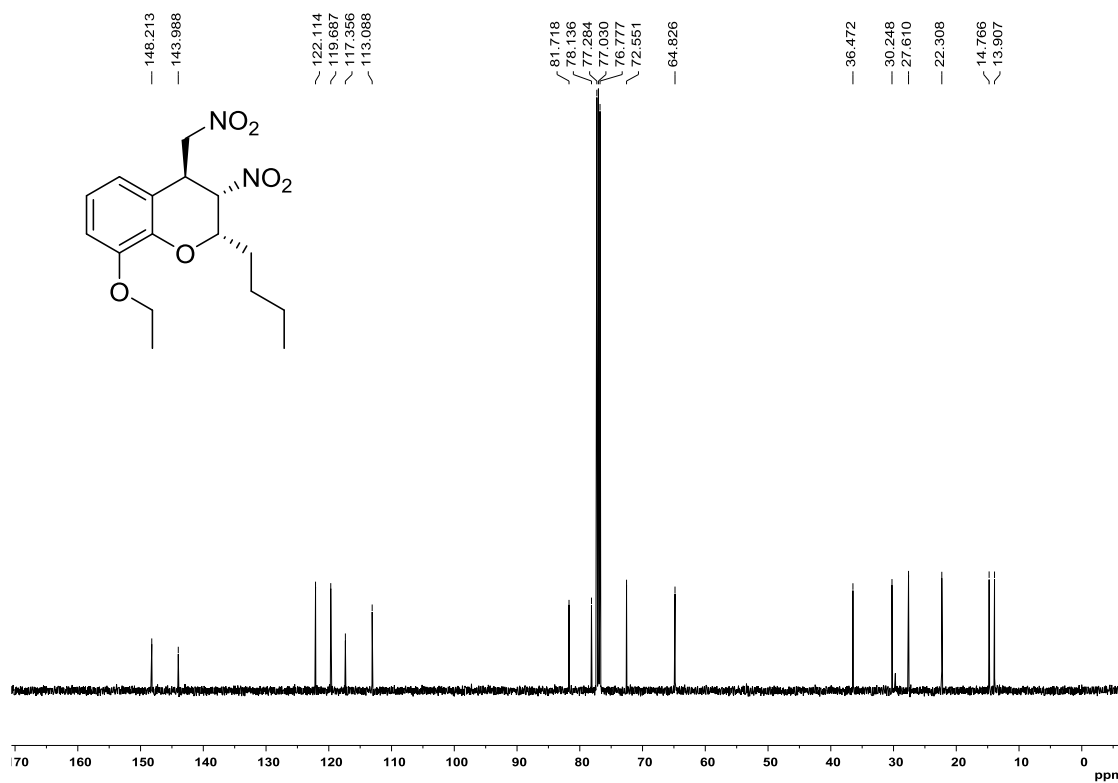

## HPLC chromatograms of 4e

### 4e-rac

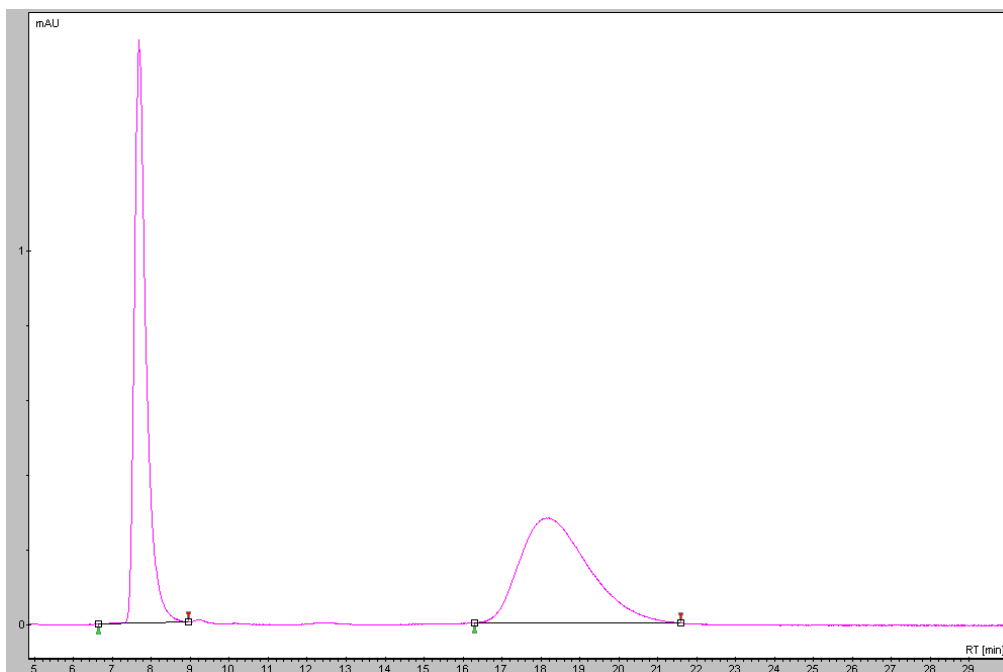

| # | Start time[min] | Time[min] | End time[min] | Area%  |
|---|-----------------|-----------|---------------|--------|
| 1 | 6.628           | 7.666     | 8.945         | 48.366 |
| 2 | 16.305          | 18.185    | 21.591        | 51.634 |

### 4e-chr

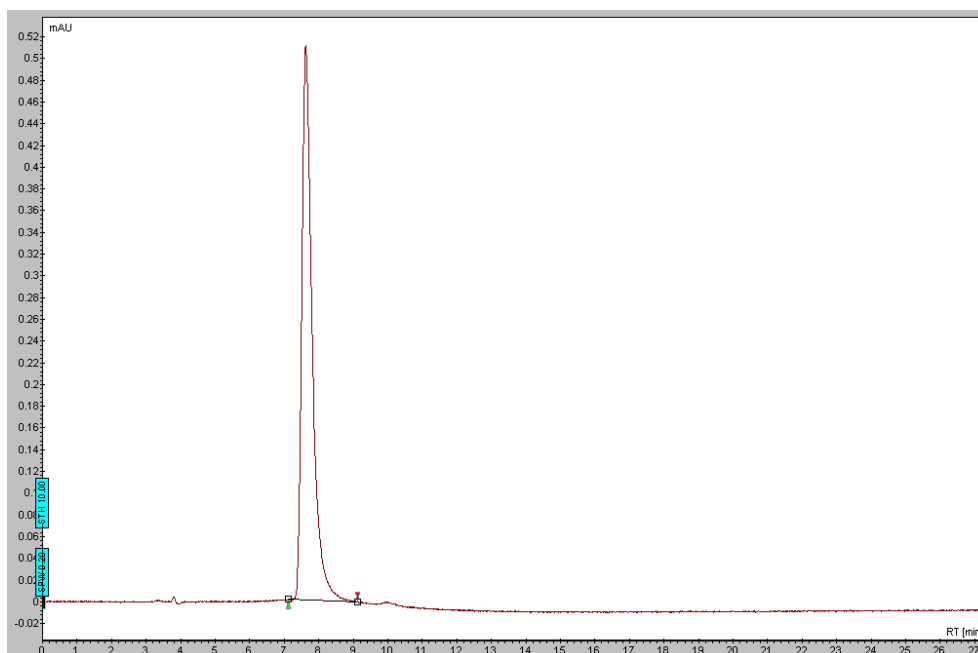

| # | Start time[min] | Time[min] | End time[min] | Area% |
|---|-----------------|-----------|---------------|-------|
| 1 | 7.119           | 7.626     | 9.125         | 100   |
| 2 |                 |           |               |       |

### <sup>1</sup>H NMR spectrum of 4f

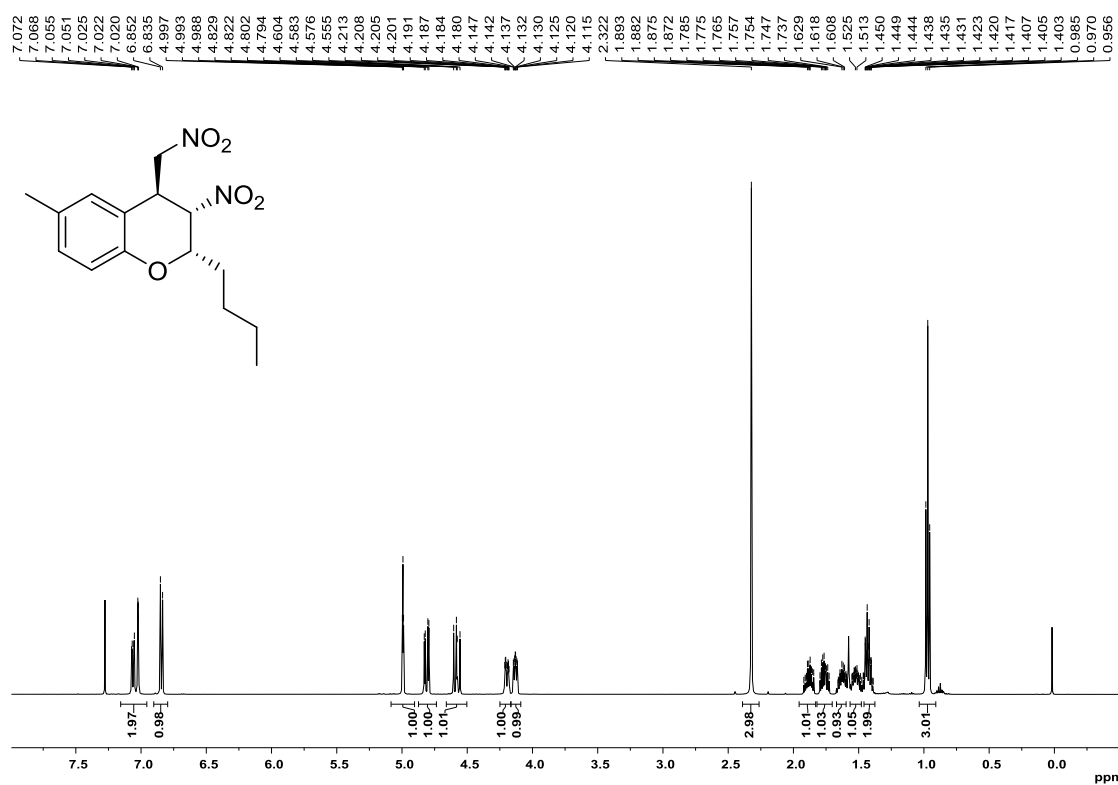

### <sup>13</sup>C NMR spectrum of 4f

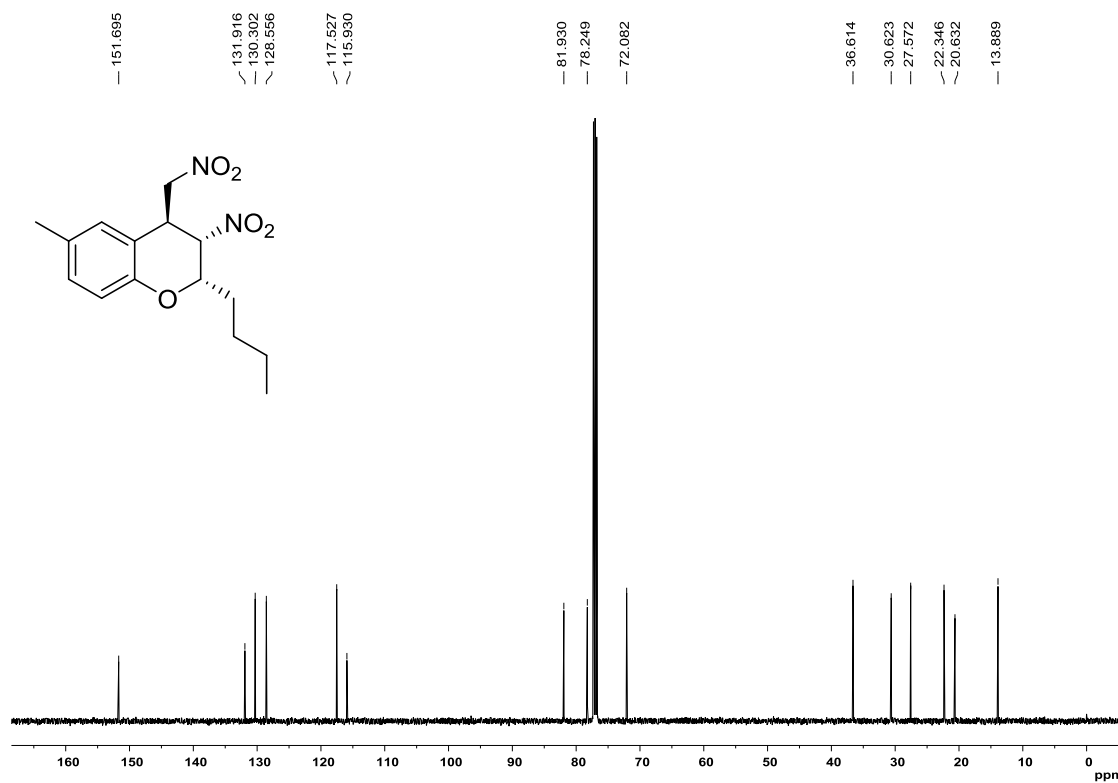

## HPLC chromatograms of 4f

### 4f-rac

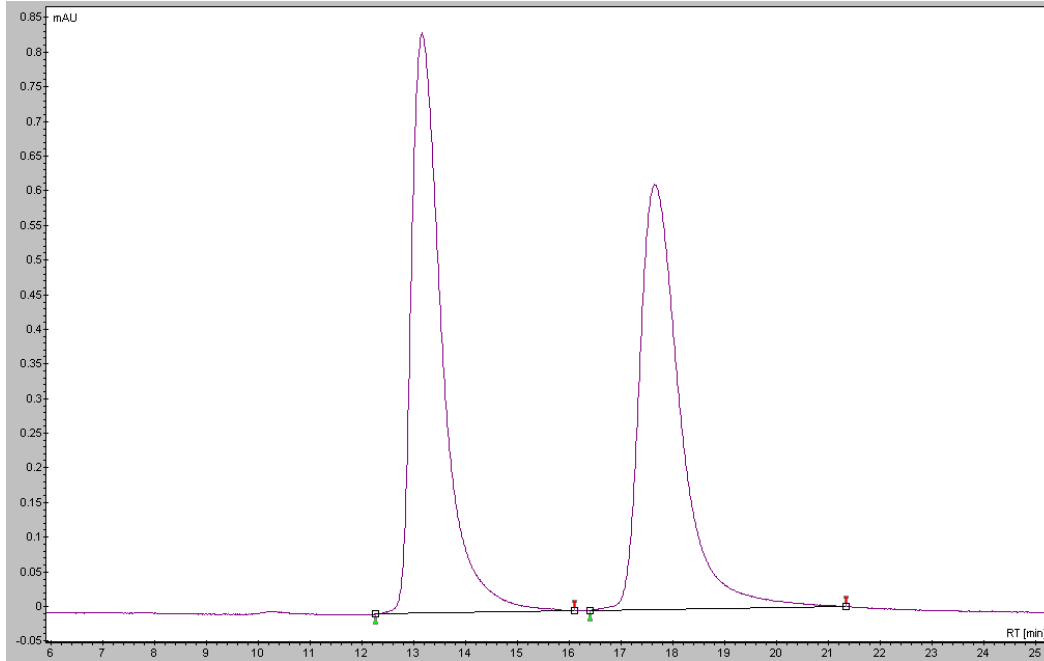

| # | Start time[min] | Time[min] | End time[min] | Area%  |
|---|-----------------|-----------|---------------|--------|
| 1 | 12.243          | 13.146    | 16.086        | 51.031 |
| 2 | 26.339          | 17.652    | 21.325        | 48.969 |

### 4f-chr

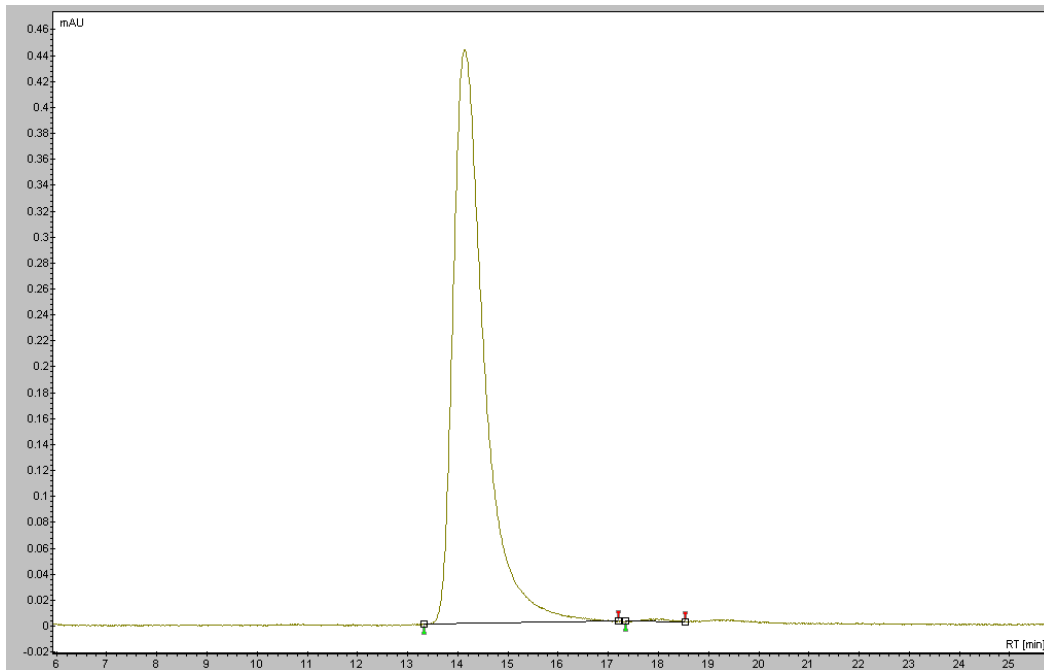

| # | Start time[min] | Time[min] | End time[min] | Area%  |
|---|-----------------|-----------|---------------|--------|
| 1 | 13.320          | 14.132    | 17.202        | 99.679 |
| 2 | 17.344          | 17.945    | 18.533        | 0.321  |

### <sup>1</sup>H NMR spectrum of 4g

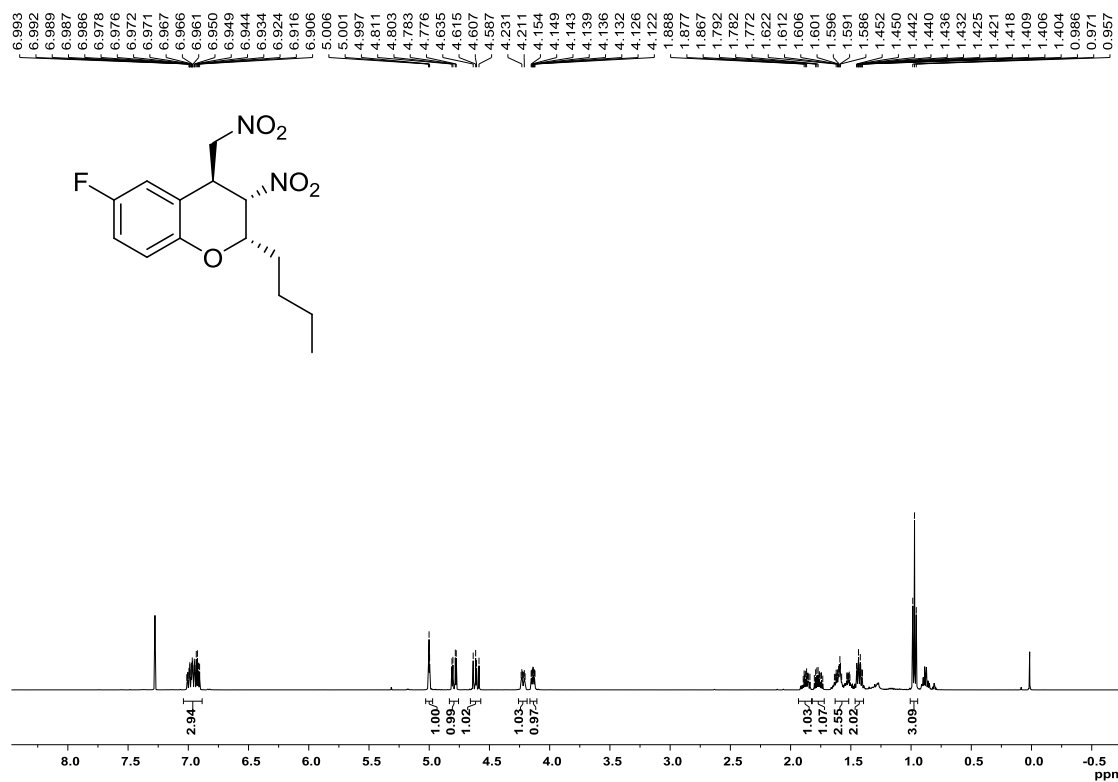

### <sup>13</sup>C NMR spectrum of 4g

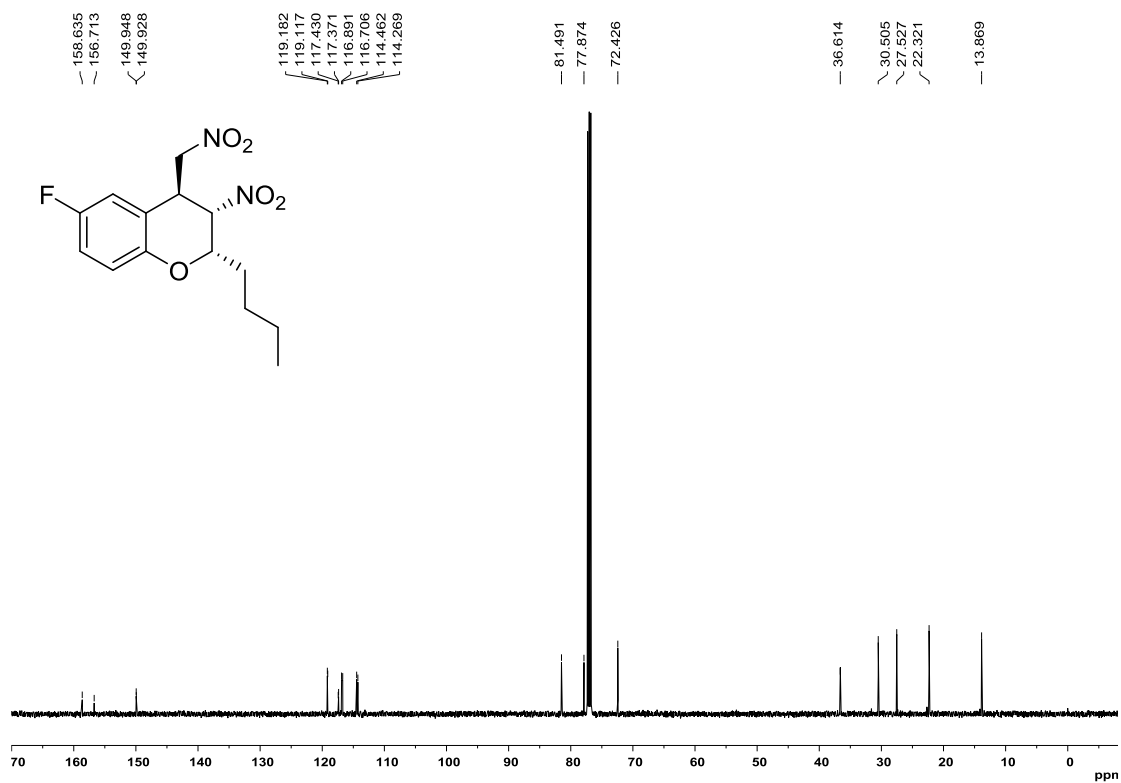

# HPLC chromatograms of 4g

## 4g-rac

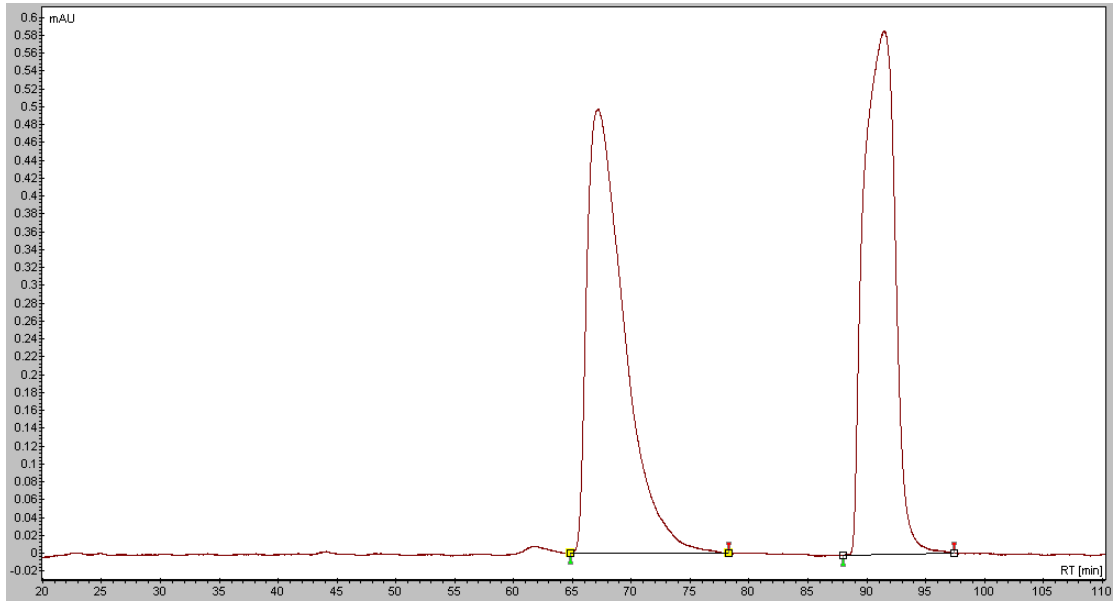

| # | Start time[min] | Time[min] | End time[min] | Area%  |
|---|-----------------|-----------|---------------|--------|
| 1 | 64.795          | 67.216    | 78.284        | 50.360 |
| 2 | 87.990          | 91.487    | 97.445        | 49.640 |

## 4g-chr

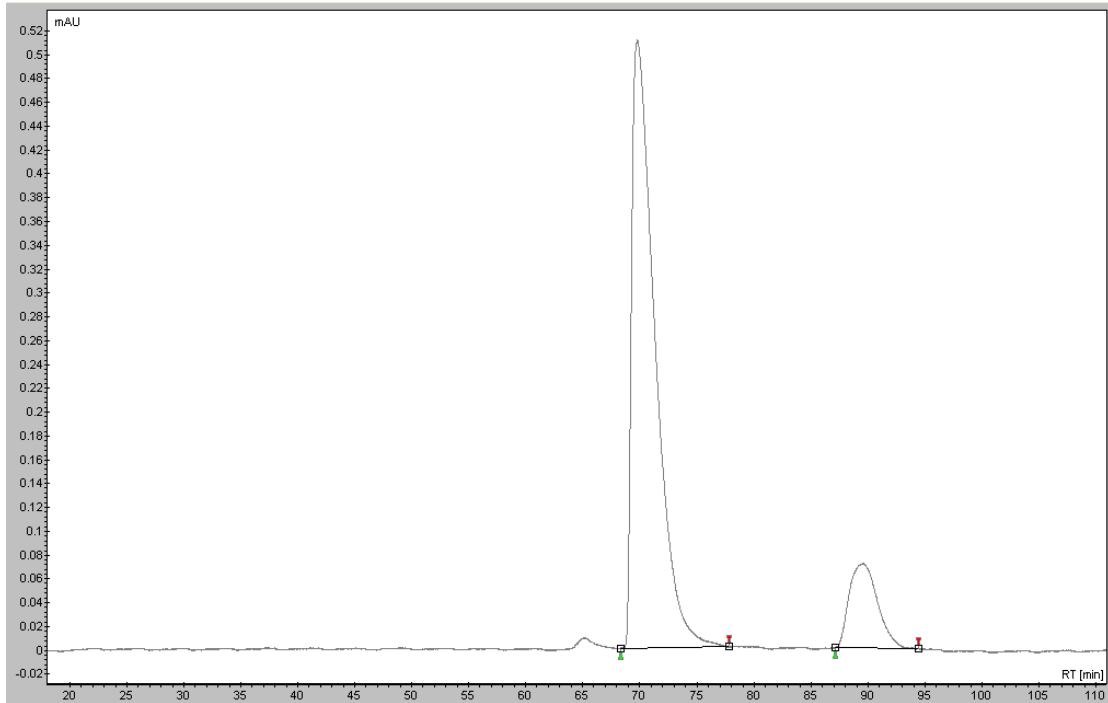

| # | Start time[min] | Time[min] | End time[min] | Area%  |
|---|-----------------|-----------|---------------|--------|
| 1 | 68.329          | 69.788    | 77.848        | 85.543 |
| 2 | 87.107          | 89.555    | 94.409        | 14.457 |

### <sup>1</sup>H NMR spectrum of 4h

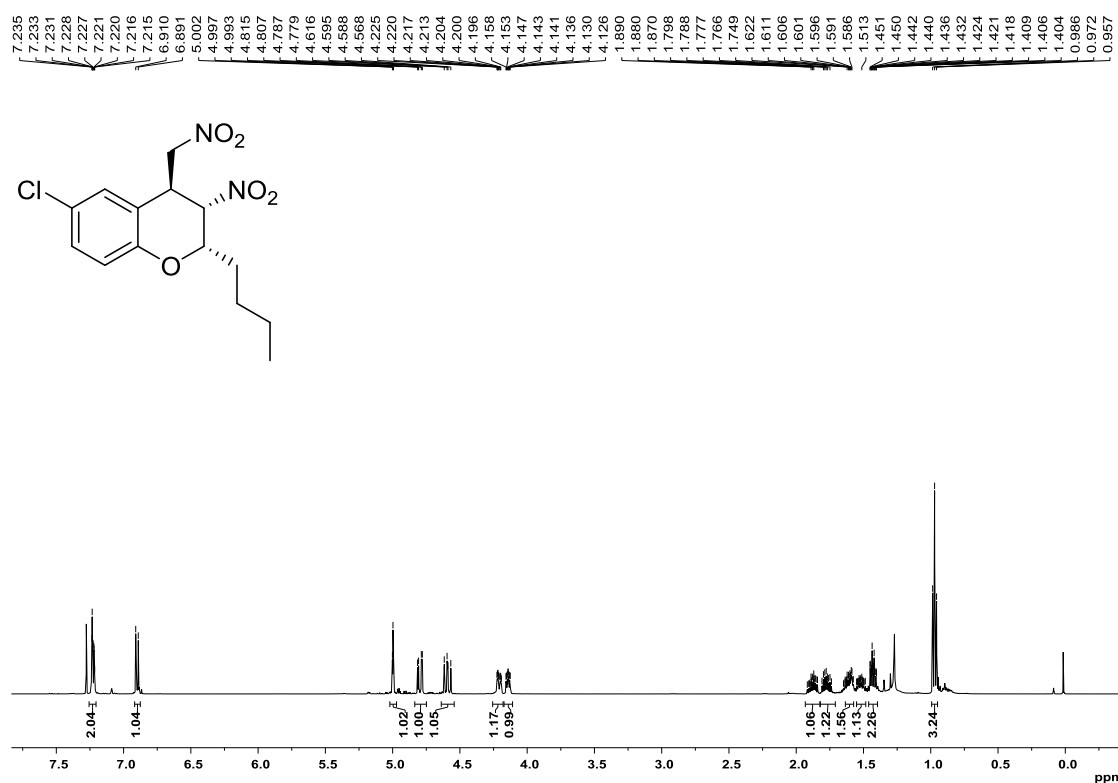

### <sup>13</sup>C NMR spectrum of 4h

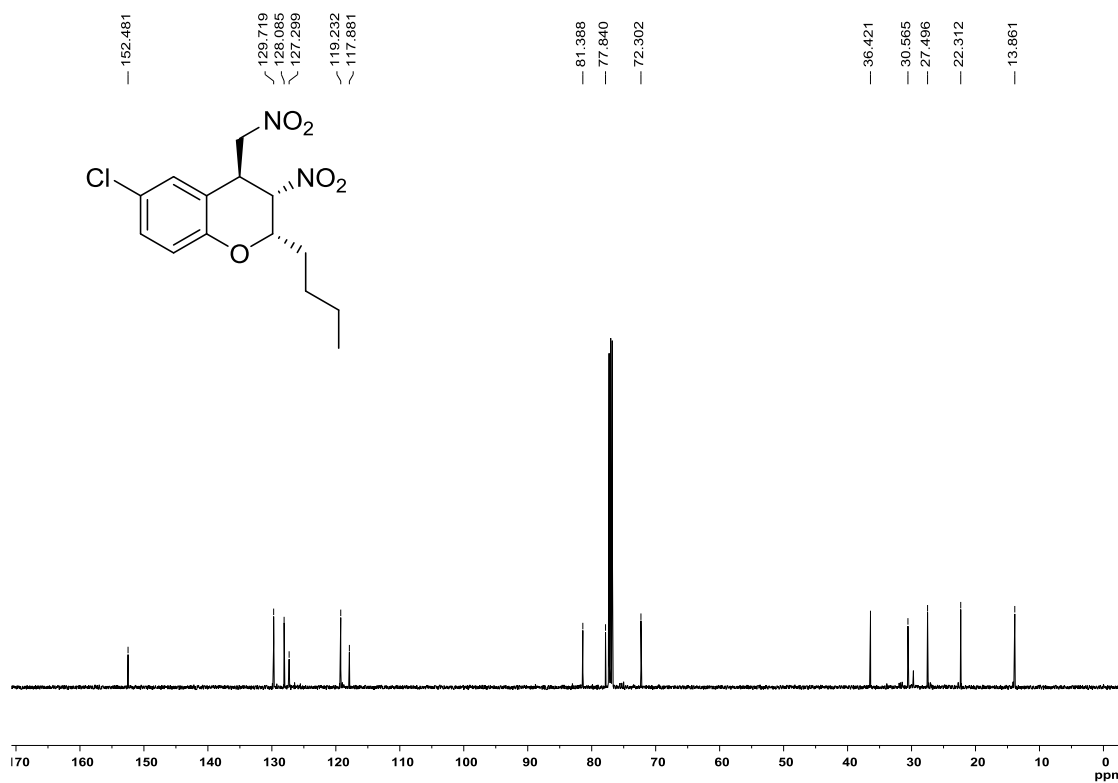



## HPLC chromatograms of 4h

### 4h-rac

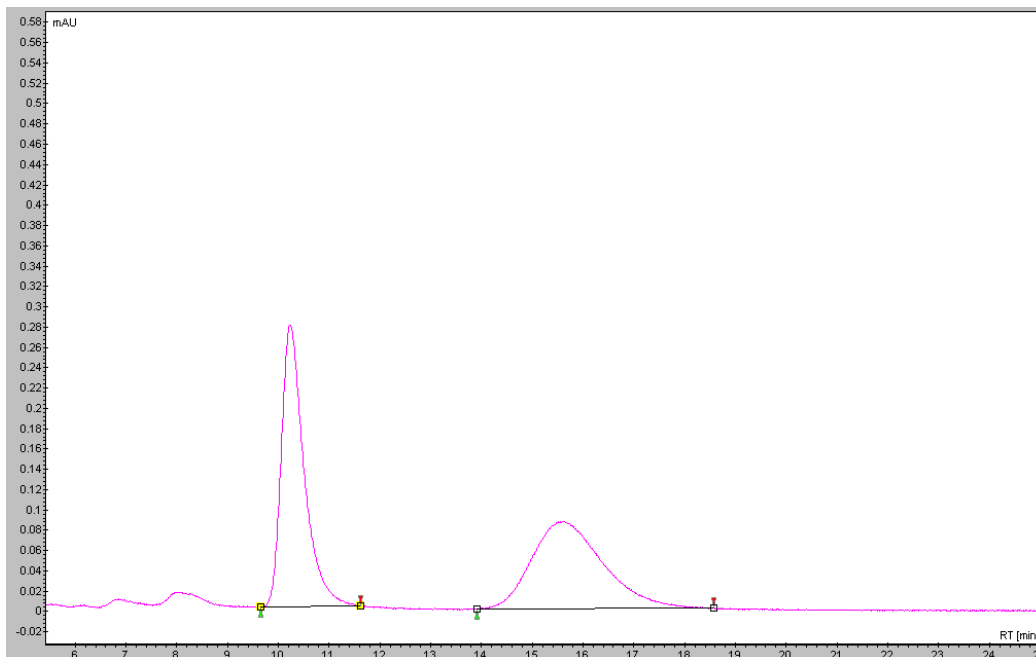

| # | Start time[min] | Time[min] | End time[min] | Area%  |
|---|-----------------|-----------|---------------|--------|
| 1 | 9.648           | 10.239    | 11.621        | 50.908 |
| 2 | 13.913          | 15.586    | 18.577        | 49.092 |

### 4h-chr

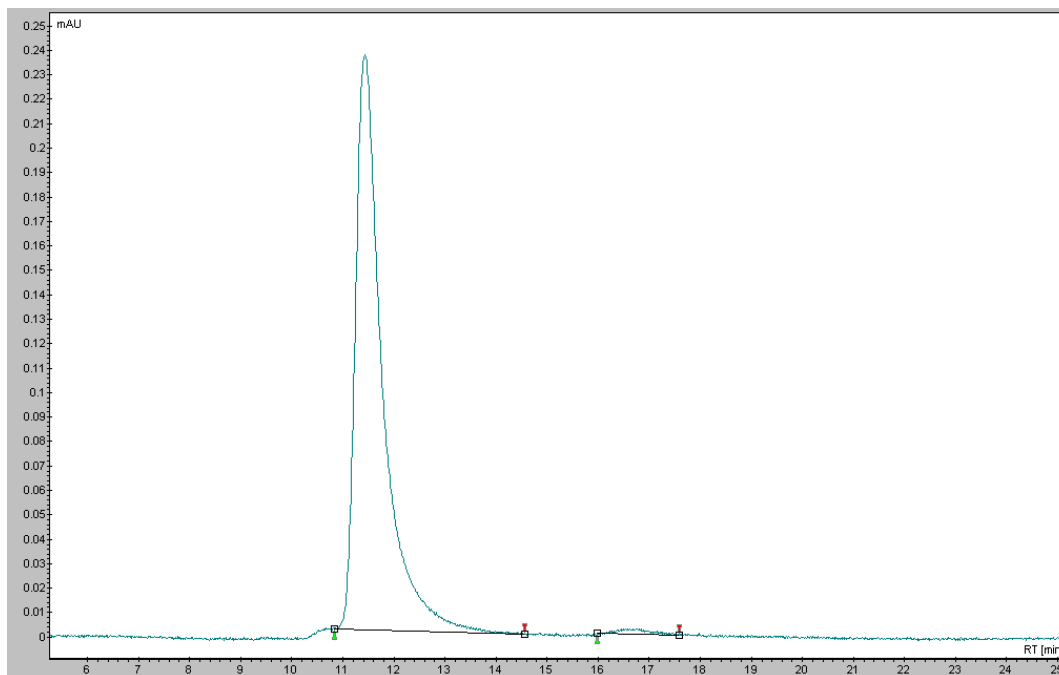

| # | Start time[min] | Time[min] | End time[min] | Area%  |
|---|-----------------|-----------|---------------|--------|
| 1 | 10.835          | 11.439    | 14.565        | 98.894 |
| 2 | 15.986          | 16.692    | 17.584        | 1.106  |

### <sup>1</sup>H NMR spectrum of 4i

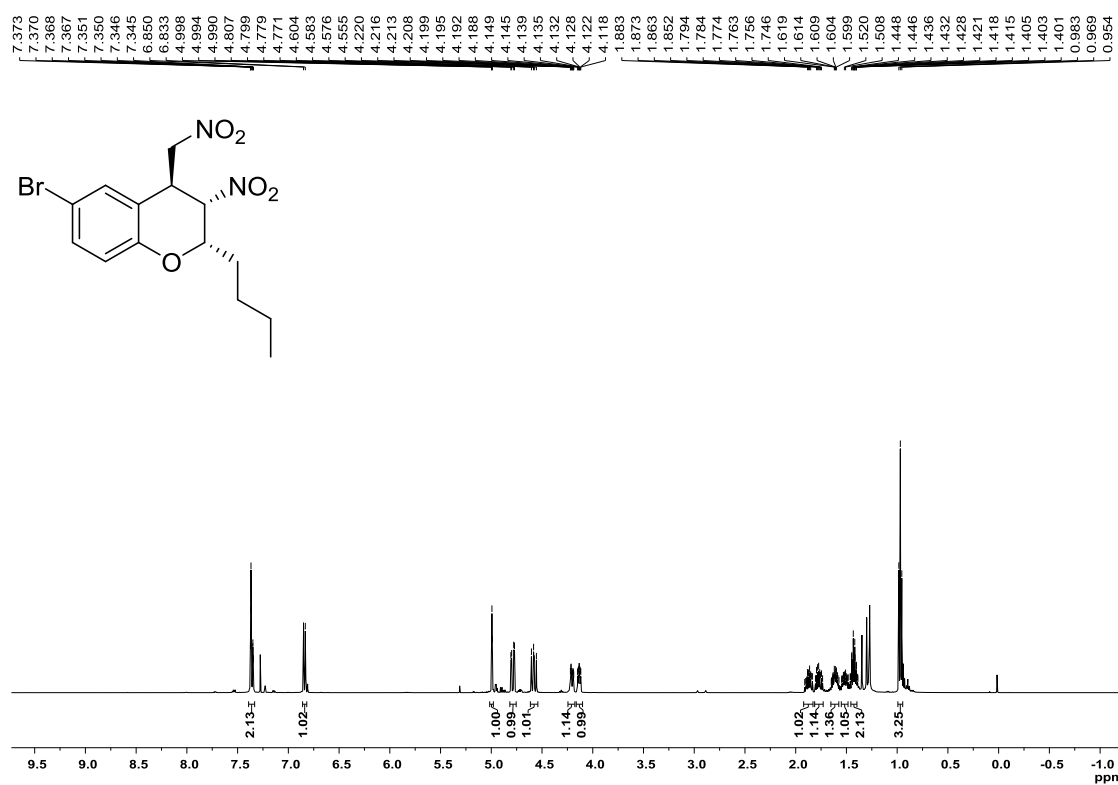

### <sup>13</sup>C NMR spectrum of 4i

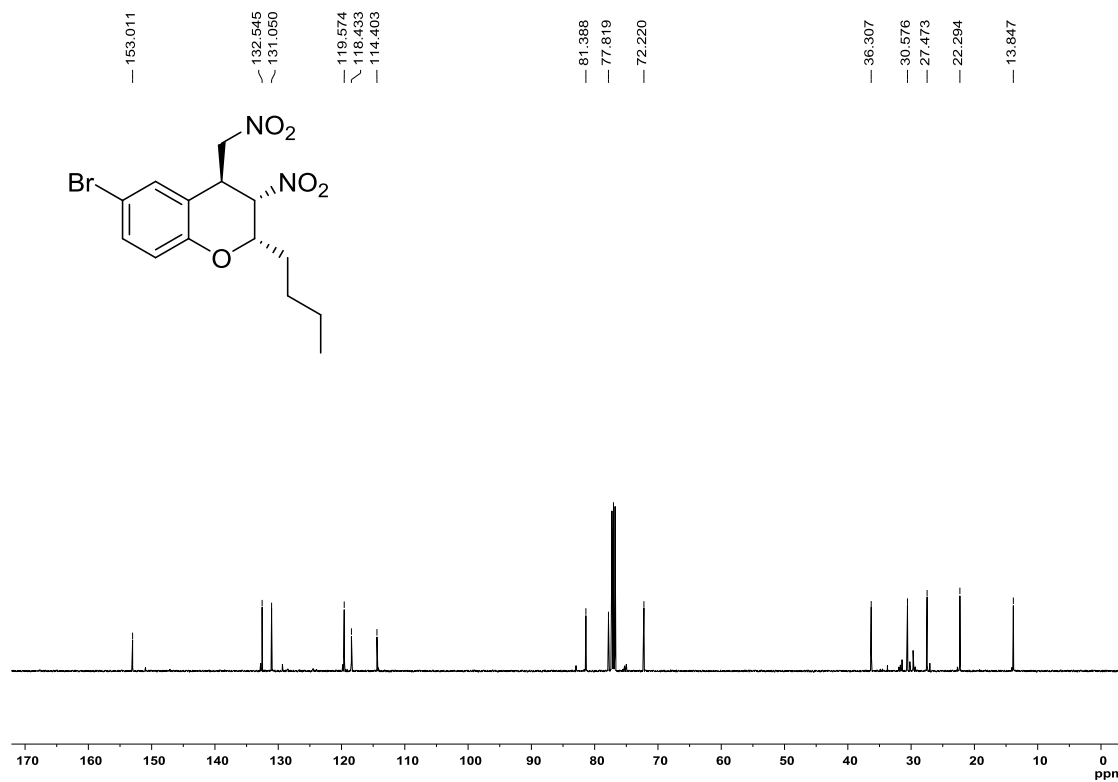

## HPLC chromatograms of 4i

### 4i-rac

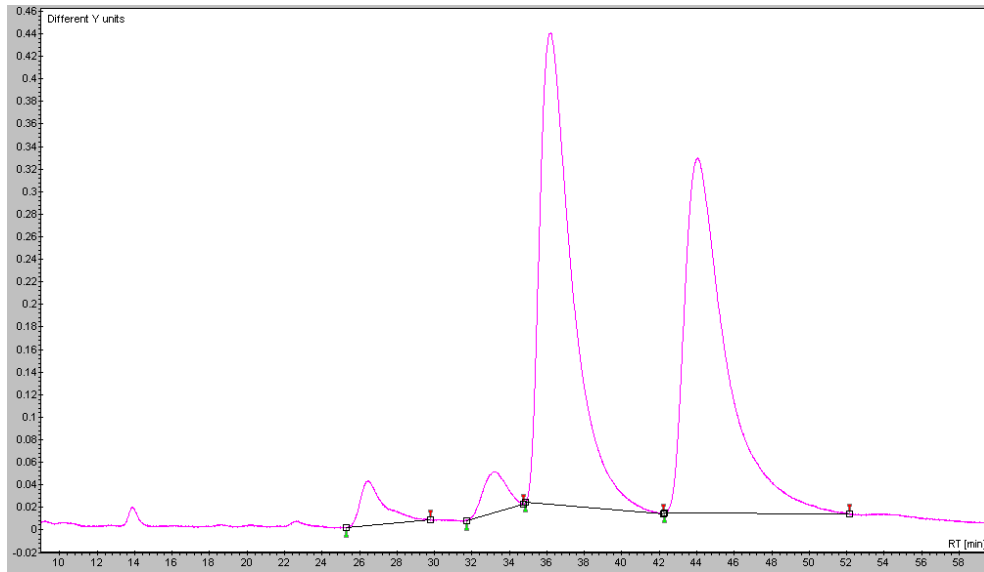

| # | Start time[min] | Time[min] | End time[min] | Area%  |
|---|-----------------|-----------|---------------|--------|
| 1 | 25.289          | 26.438    | 29.803        | 3.283  |
| 2 | 31.720          | 33.171    | 34.750        | 3.004  |
| 3 | 34.873          | 36.197    | 42.231        | 47.990 |
| 4 | 42.293          | 44.050    | 52.124        | 45.723 |

### 4i-chr

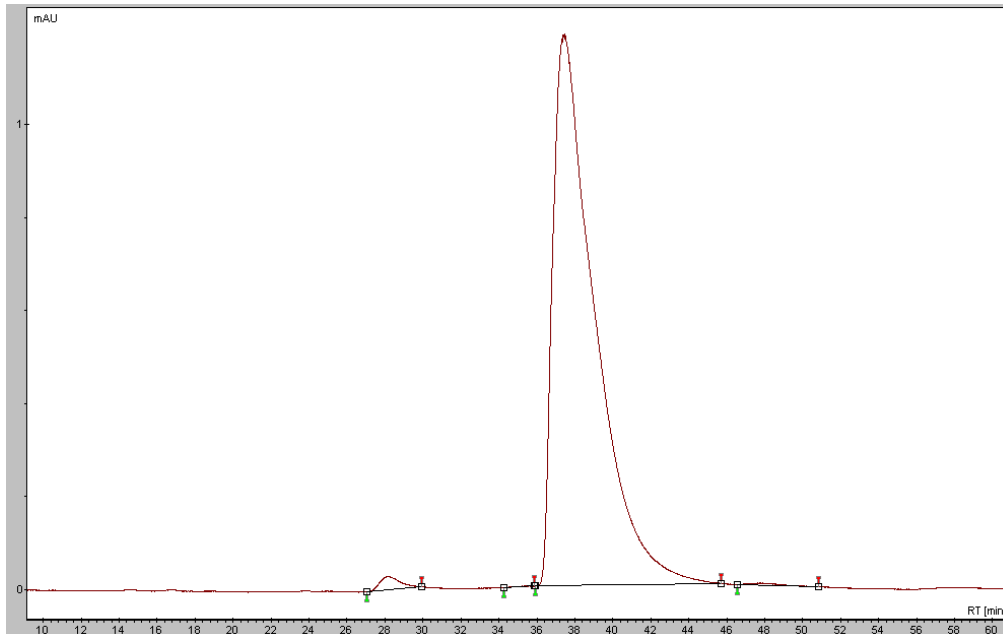

| # | Start time[min] | Time[min] | End time[min] | Area%  |
|---|-----------------|-----------|---------------|--------|
| 1 | 27.067          | 28.137    | 29.949        | 1.160  |
| 2 | 34.238          | 35.041    | 35.855        | 0.028  |
| 3 | 35.925          | 37.453    | 45.697        | 98.526 |
| 4 | 46.541          | 47.810    | 50.829        | 0.285  |



## HPLC chromatograms of 4j

### 4j-rac

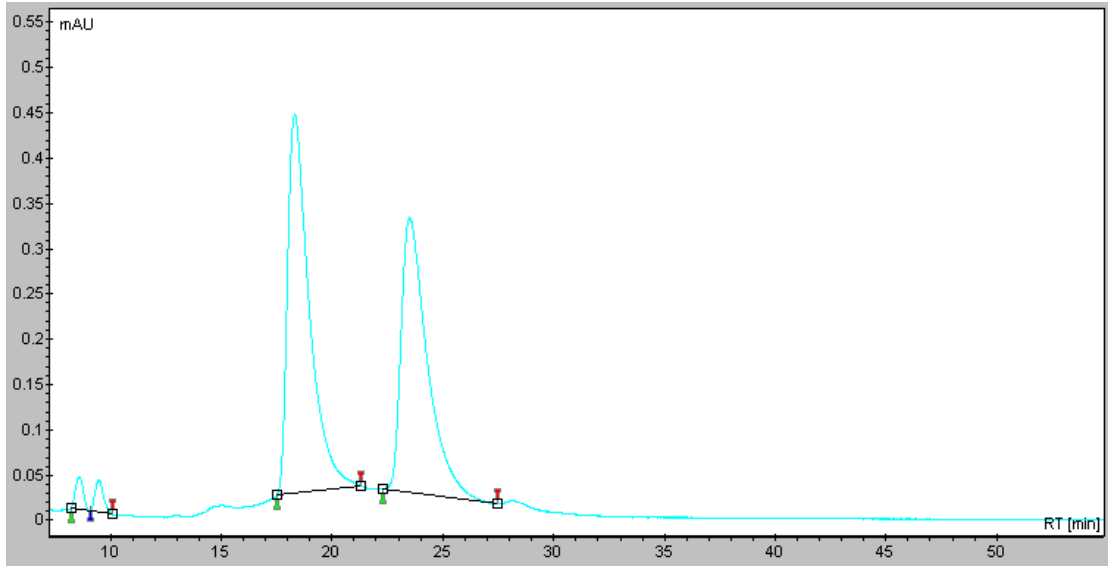

| # | Start time[min] | Time[min] | End time[min] | Area%  |
|---|-----------------|-----------|---------------|--------|
| 1 | 8.232           | 8.599     | 9.12          | 1.55   |
| 2 | 9.12            | 9.479     | 10.088        | 1.723  |
| 3 | 17.52           | 18.319    | 21.3          | 48.964 |
| 4 | 22.295          | 23.505    | 27.467        | 47.763 |

### 4j-chr

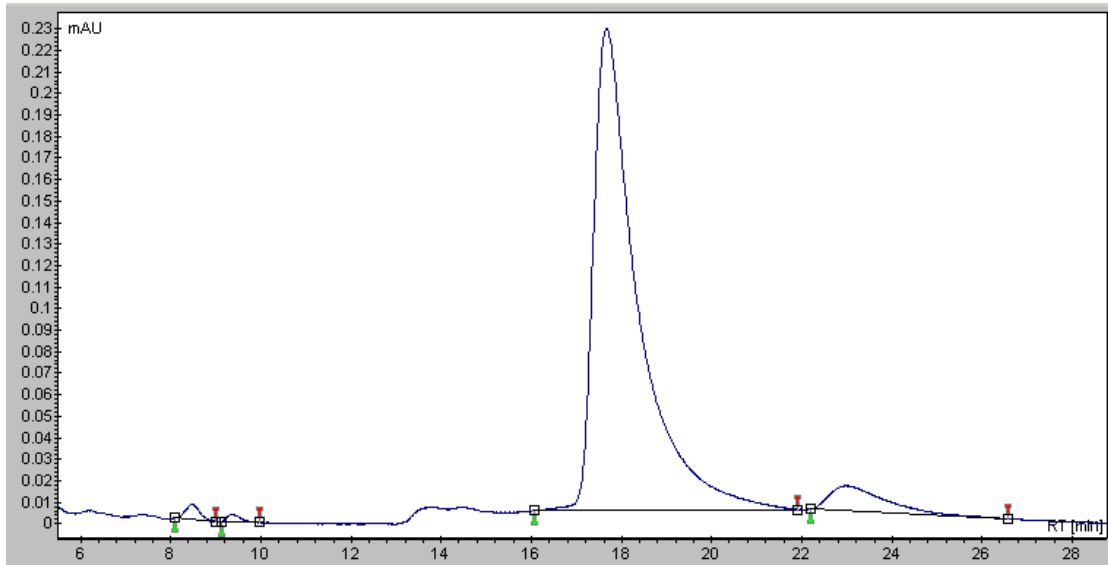

| # | Start time[min] | Time[min] | End time[min] | Area%  |
|---|-----------------|-----------|---------------|--------|
| 1 | 8.074           | 8.466     | 8.997         | 0.951  |
| 2 | 9.118           | 9.359     | 9.961         | 0.416  |
| 3 | 16.067          | 17.665    | 21.891        | 92.623 |
| 4 | 22.212          | 23.012    | 26.591        | 6.01   |

### <sup>1</sup>H NMR spectrum of 4k

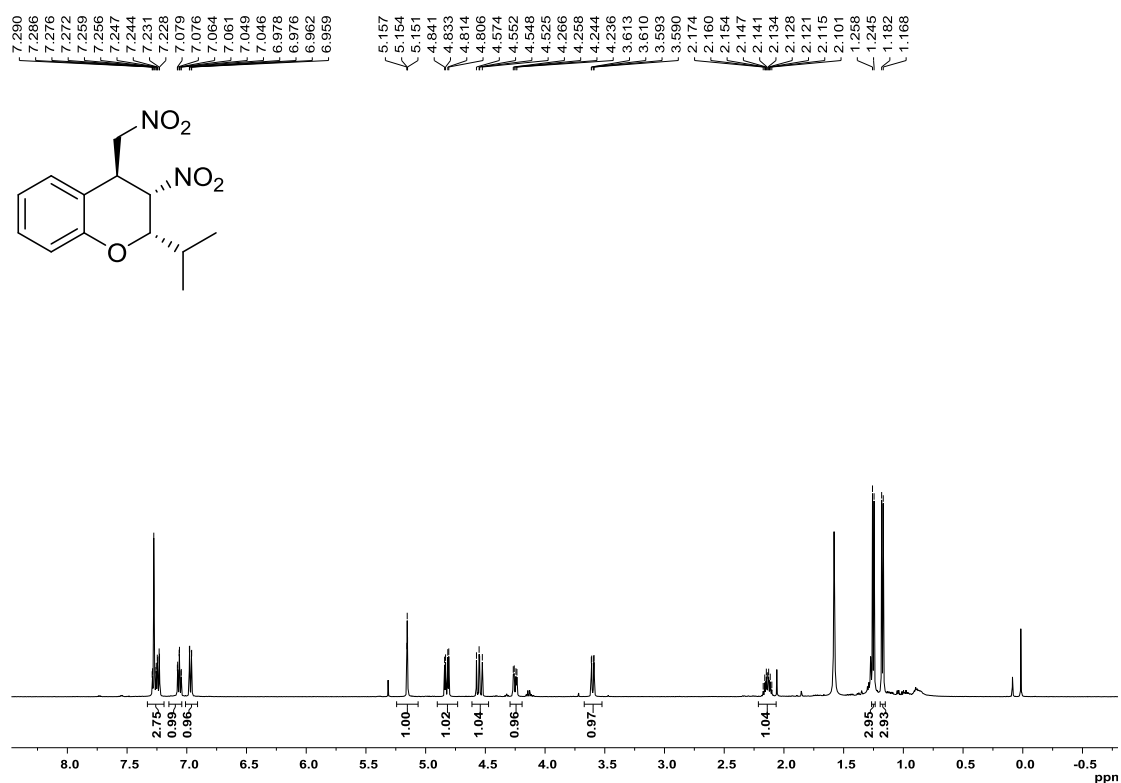

### <sup>13</sup>C NMR spectrum of 4k

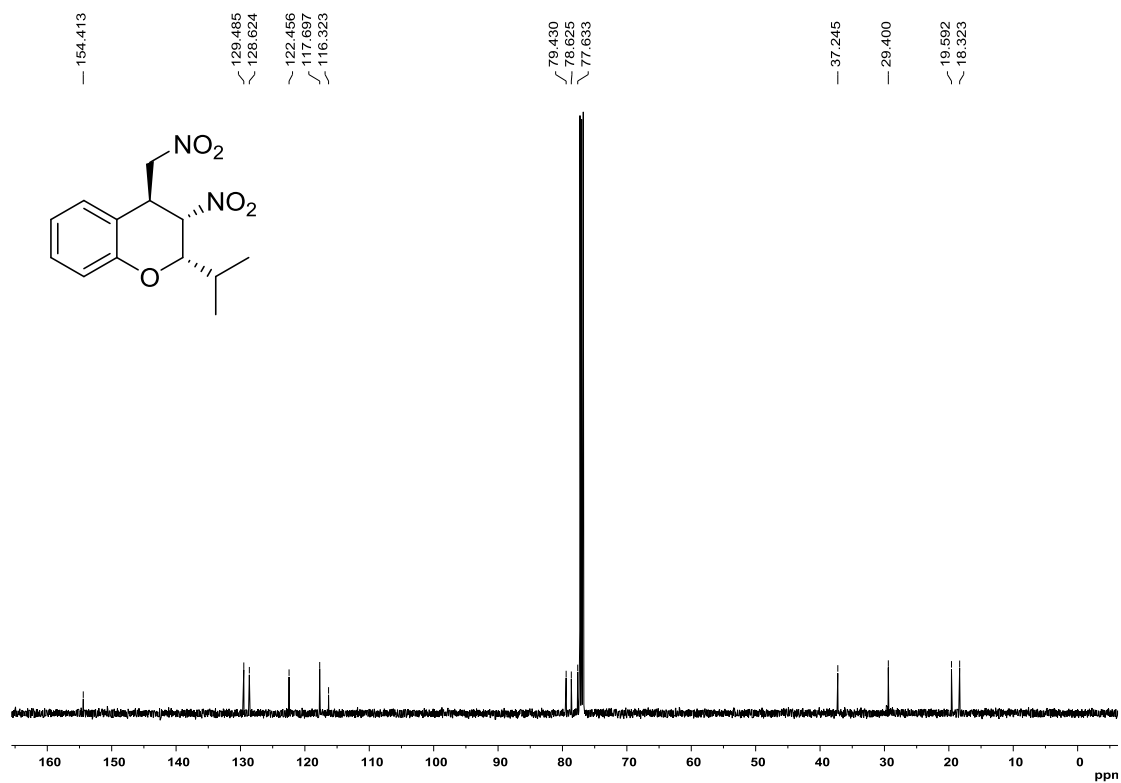

## HPLC chromatograms of 4k

### 4k-rac

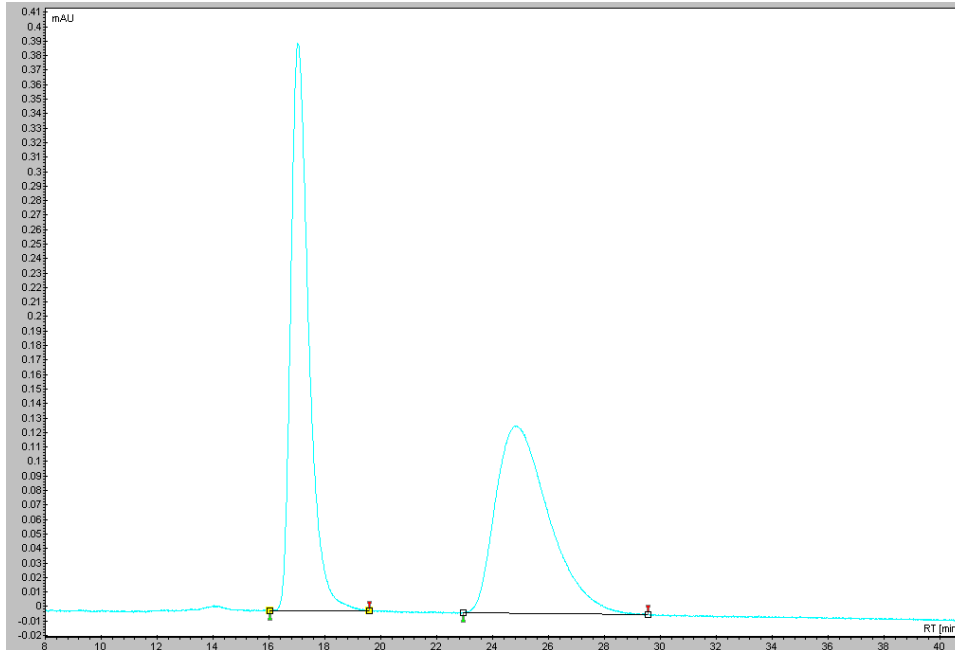

| # | Start time[min] | Time[min] | End time[min] | Area%  |
|---|-----------------|-----------|---------------|--------|
| 1 | 16.012          | 17.025    | 19.588        | 50.477 |
| 2 | 22.951          | 24.838    | 29.570        | 49.523 |

### 4k-chr

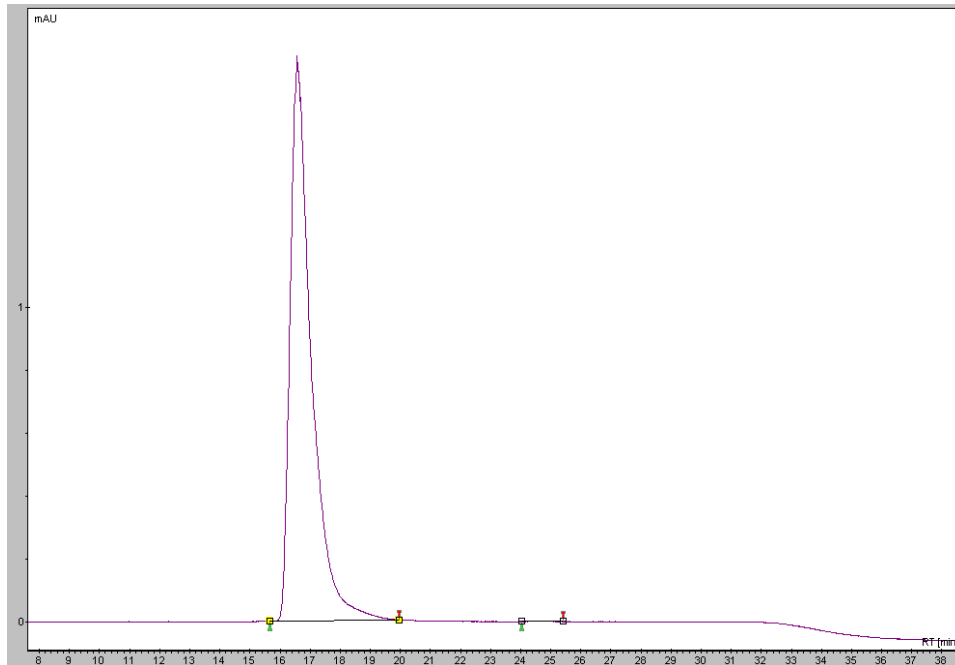

| # | Start time[min] | Time[min] | End time[min] | Area%  |
|---|-----------------|-----------|---------------|--------|
| 1 | 15.653          | 16.572    | 19.955        | 99.963 |
| 2 | 24.050          | 24.612    | 25.398        | 0.037  |

### <sup>1</sup>H NMR spectrum of 4l

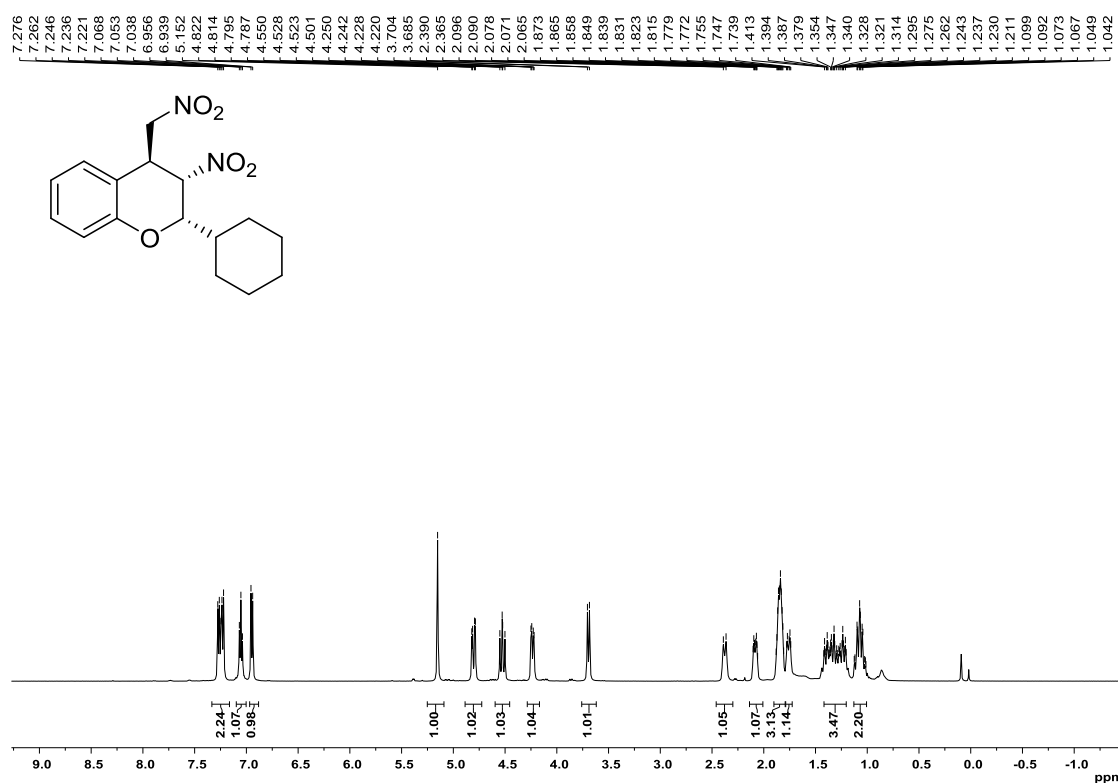

### <sup>13</sup>C NMR spectrum of 4l

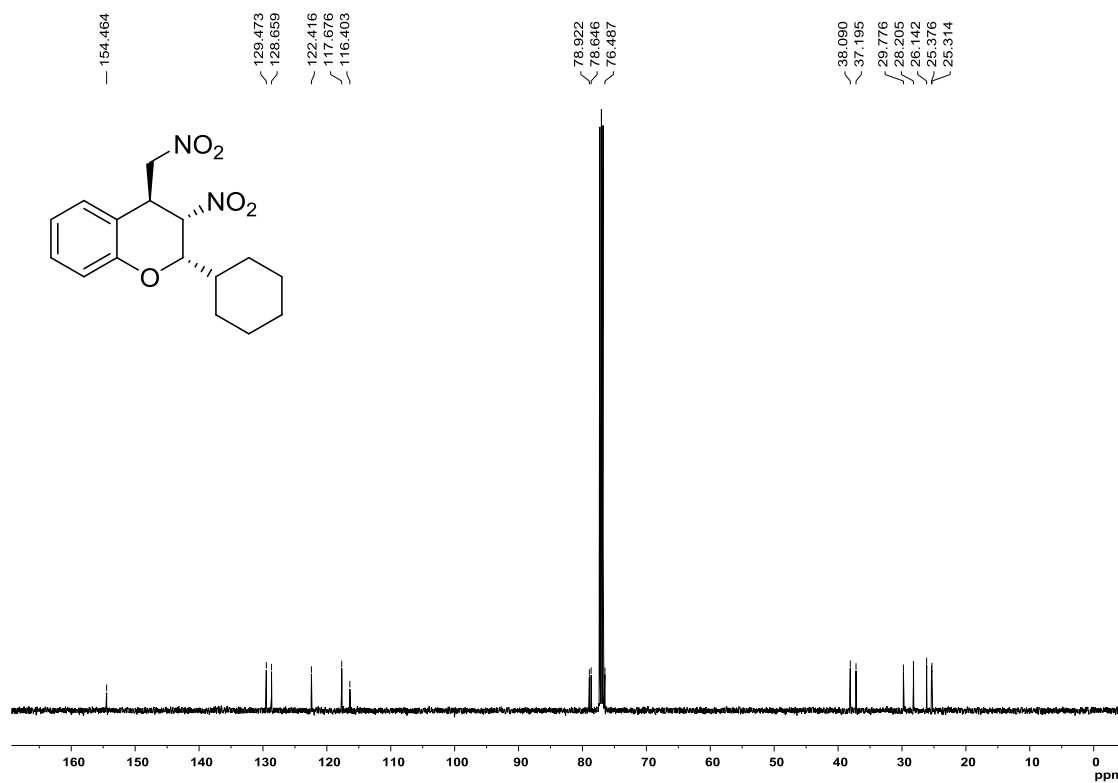



## HPLC chromatograms of 4l

### 4l-rac

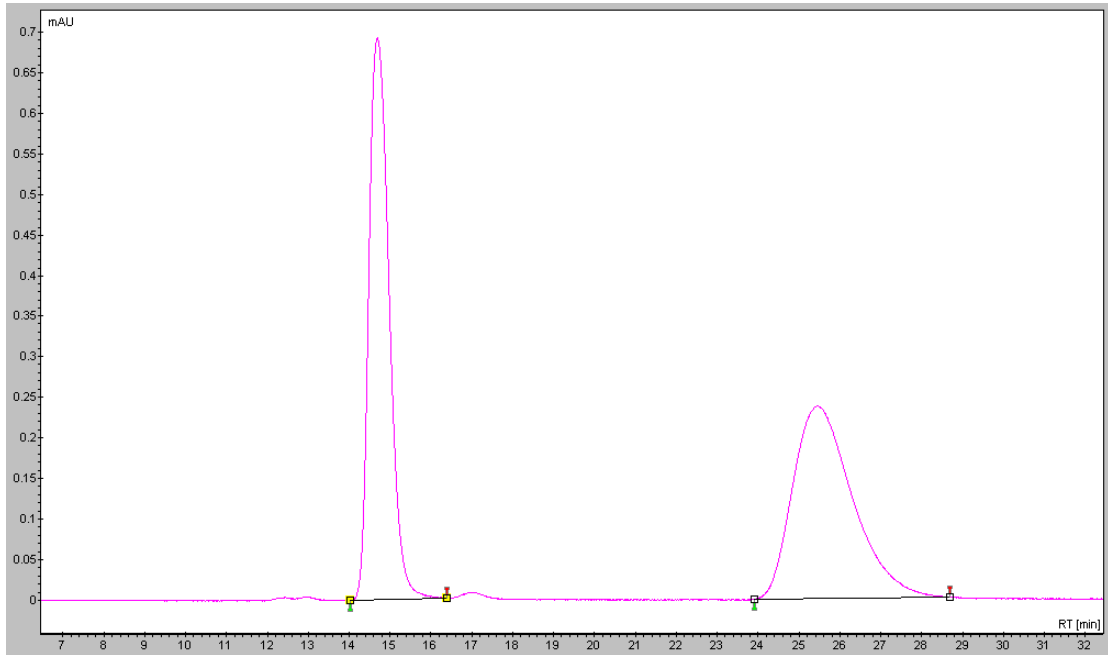

| # | Start time[min] | Time[min] | End time[min] | Area%  |
|---|-----------------|-----------|---------------|--------|
| 1 | 14.026          | 14.692    | 16.294        | 49.938 |
| 2 | 24.004          | 25.451    | 28.400        | 50.062 |

### 4l-chr

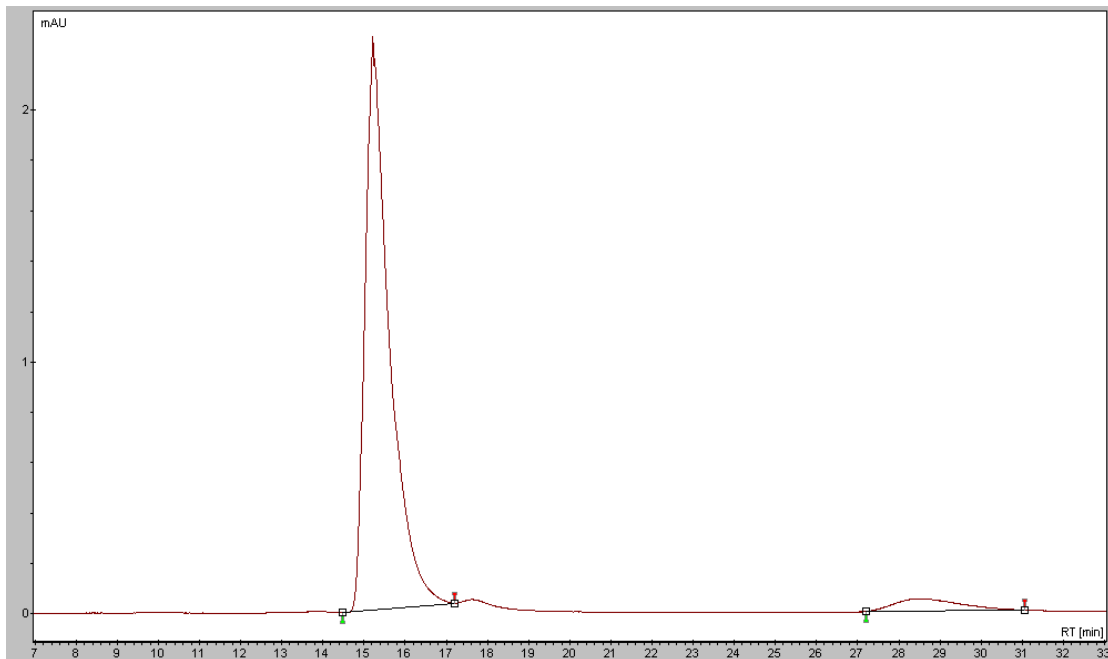

| # | Start time[min] | Time[min] | End time[min] | Area%  |
|---|-----------------|-----------|---------------|--------|
| 1 | 14.487          | 15.212    | 17.207        | 94.653 |
| 2 | 27.248          | 28.478    | 30.962        | 5.347  |

### <sup>1</sup>H NMR spectrum of 4m

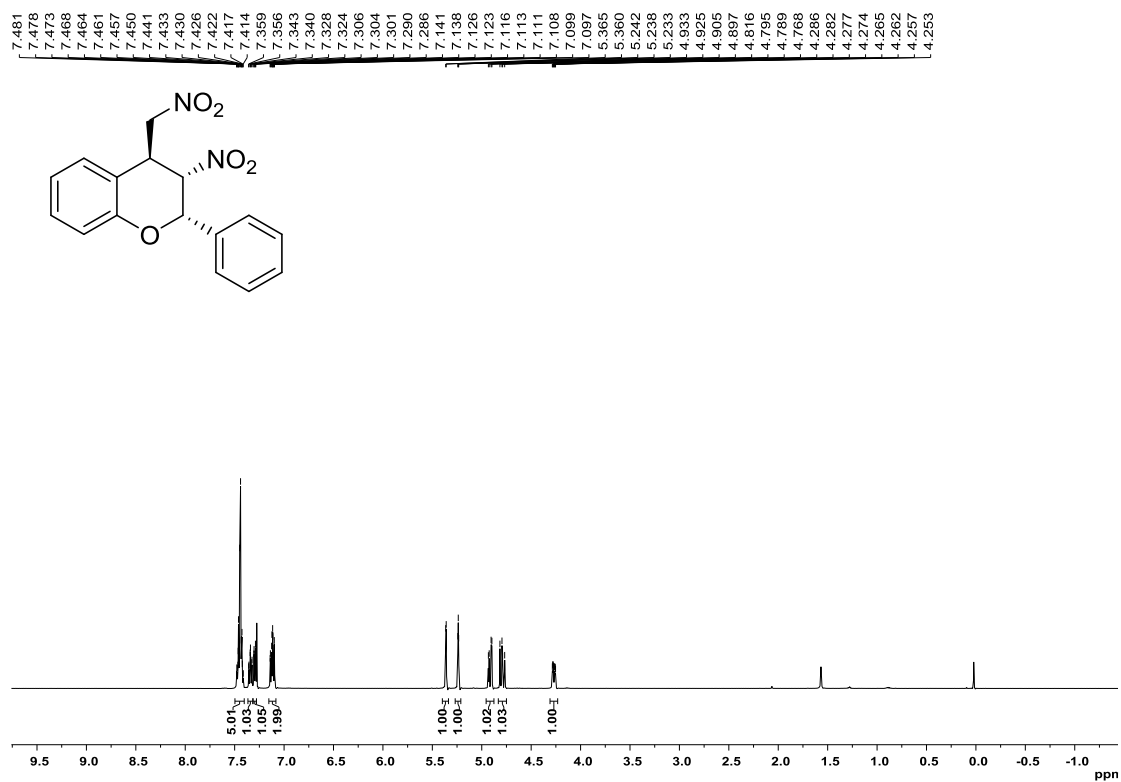

### <sup>13</sup>C NMR spectrum of 4m

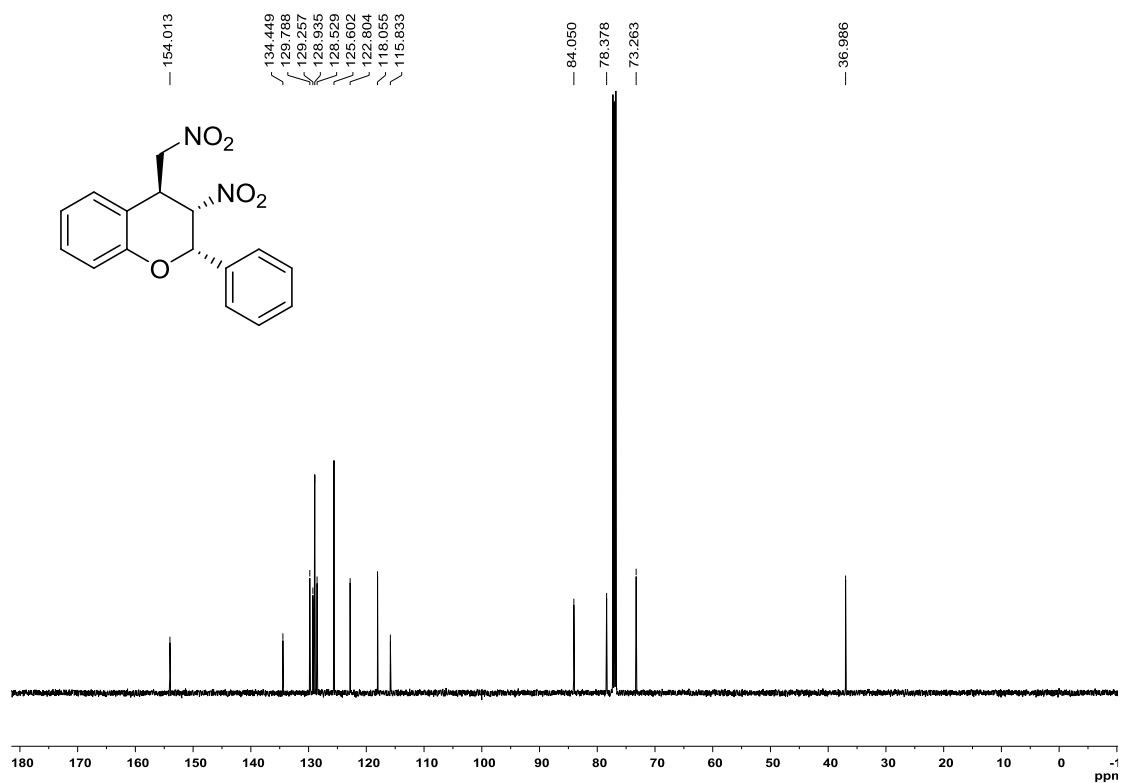

## HPLC chromatograms of 4m

### 4m-rac

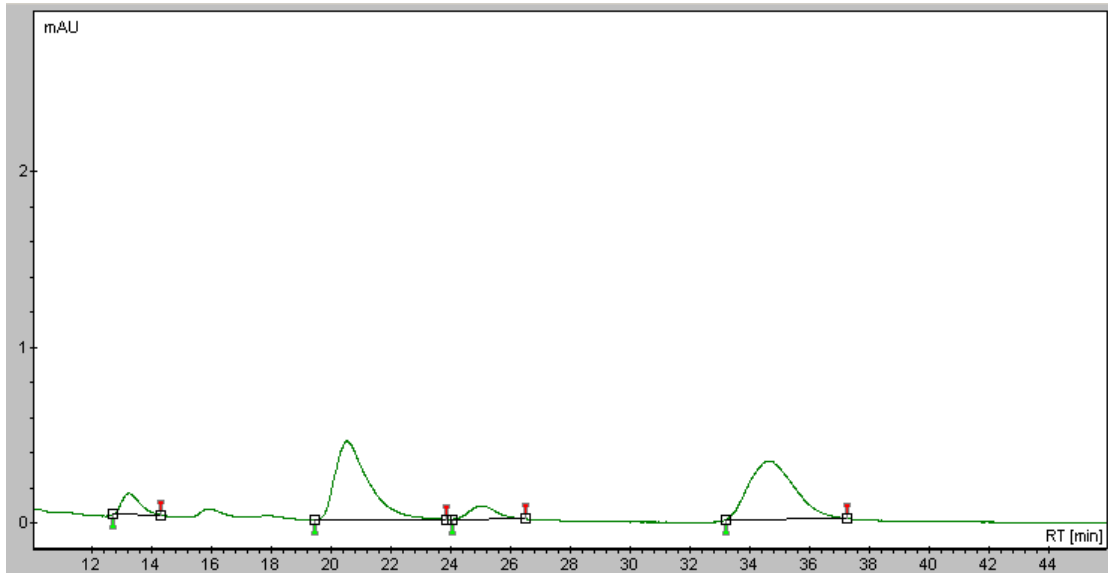

| # | Start time[min] | Time[min] | End time[min] | Area%  |
|---|-----------------|-----------|---------------|--------|
| 1 | 12.731          | 13.252    | 14.33         | 6.434  |
| 2 | 19.448          | 20.532    | 23.862        | 43.407 |
| 3 | 24.054          | 25.038    | 26.485        | 6.012  |
| 4 | 33.203          | 34.637    | 37.233        | 44.148 |

### 4m-chr

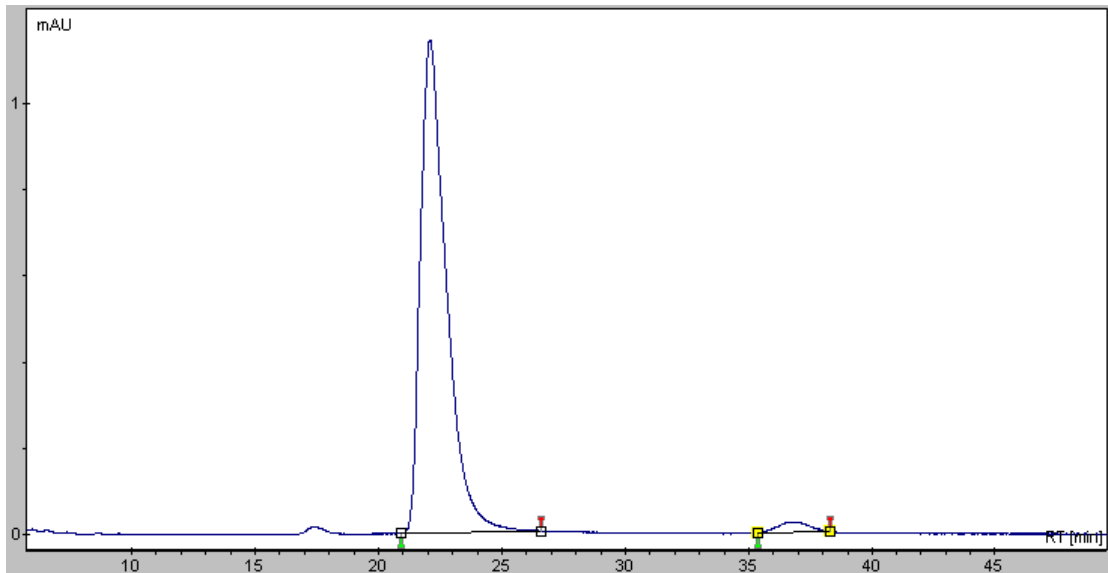

| # | Start time[min] | Time[min] | End time[min] | Area%  |
|---|-----------------|-----------|---------------|--------|
| 1 | 20.892          | 22.052    | 25.478        | 96.775 |
| 2 | 34.929          | 36.797    | 39.648        | 3.225  |

### <sup>1</sup>H NMR spectrum of 4n

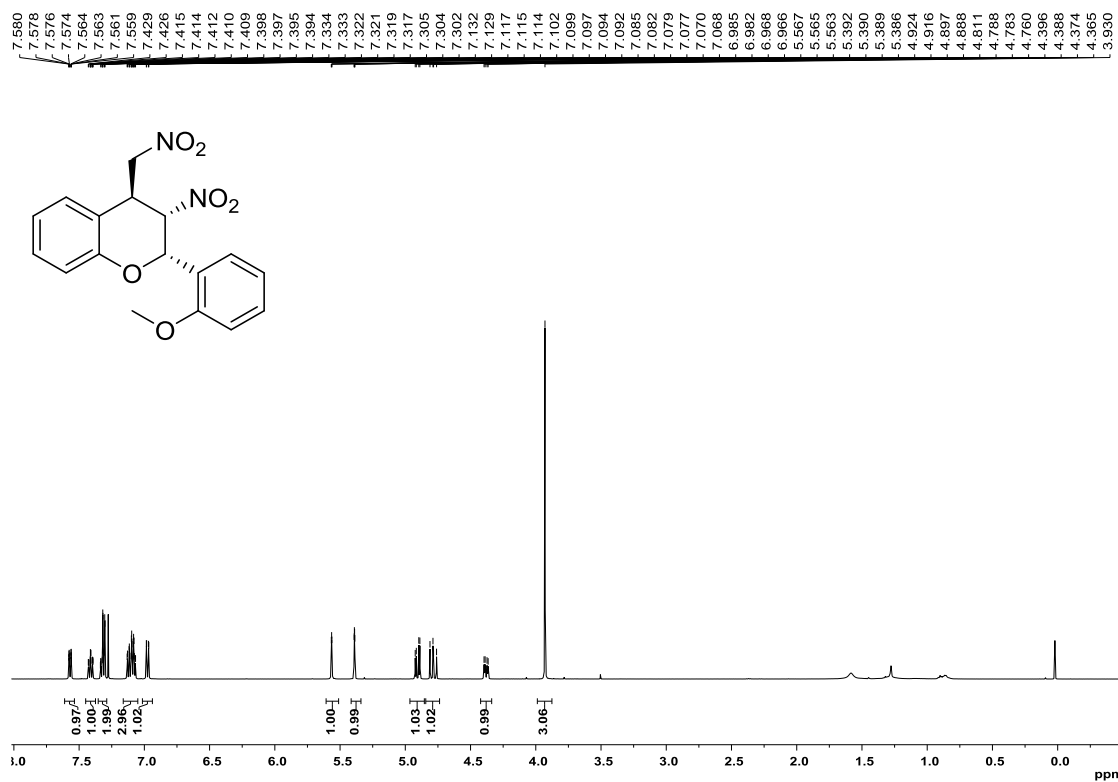

### <sup>13</sup>C NMR spectrum of 4n

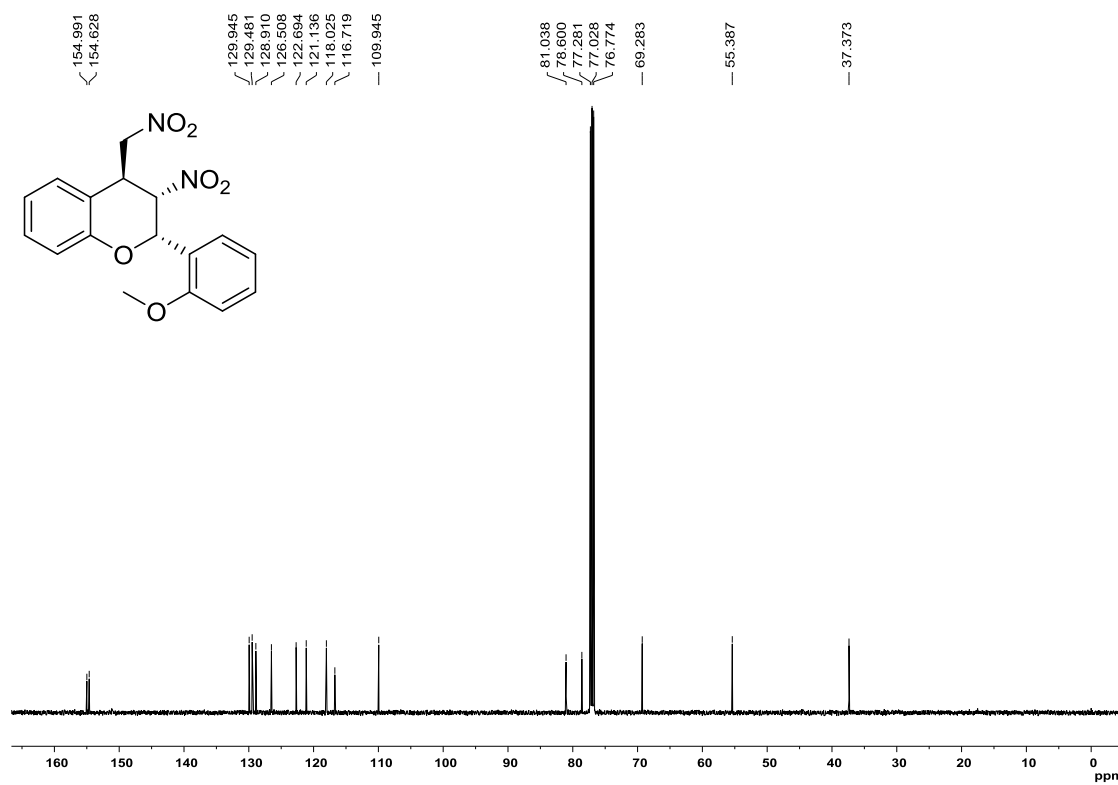

## HPLC chromatograms of 4n

### 4n-rac

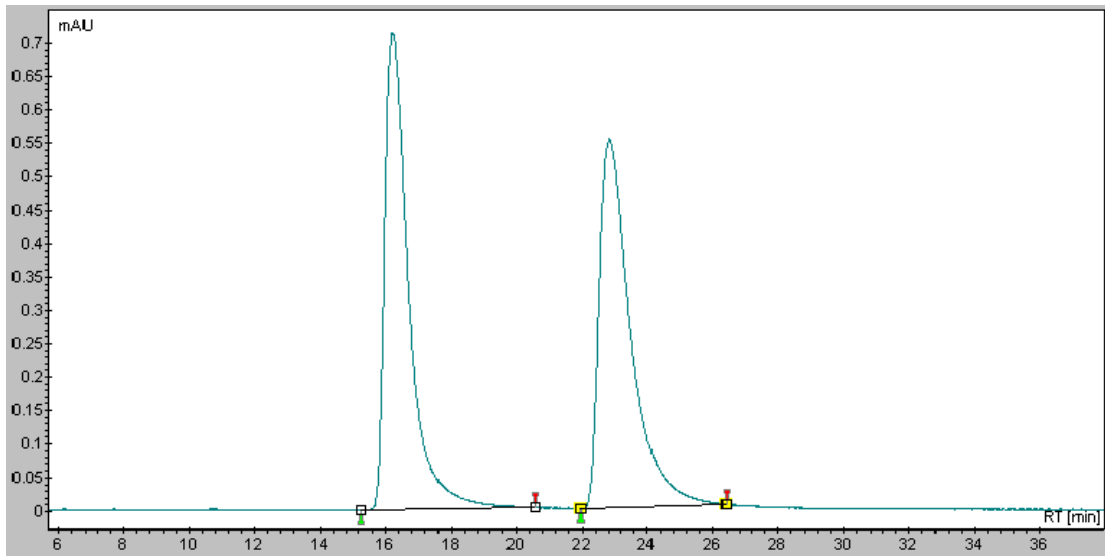

| # | Start time[min] | Time[min] | End time[min] | Area%  |
|---|-----------------|-----------|---------------|--------|
| 1 | 15.280          | 16.225    | 20.578        | 49.807 |
| 2 | 21.945          | 22.825    | 26.425        | 50.193 |

### 4n-chr

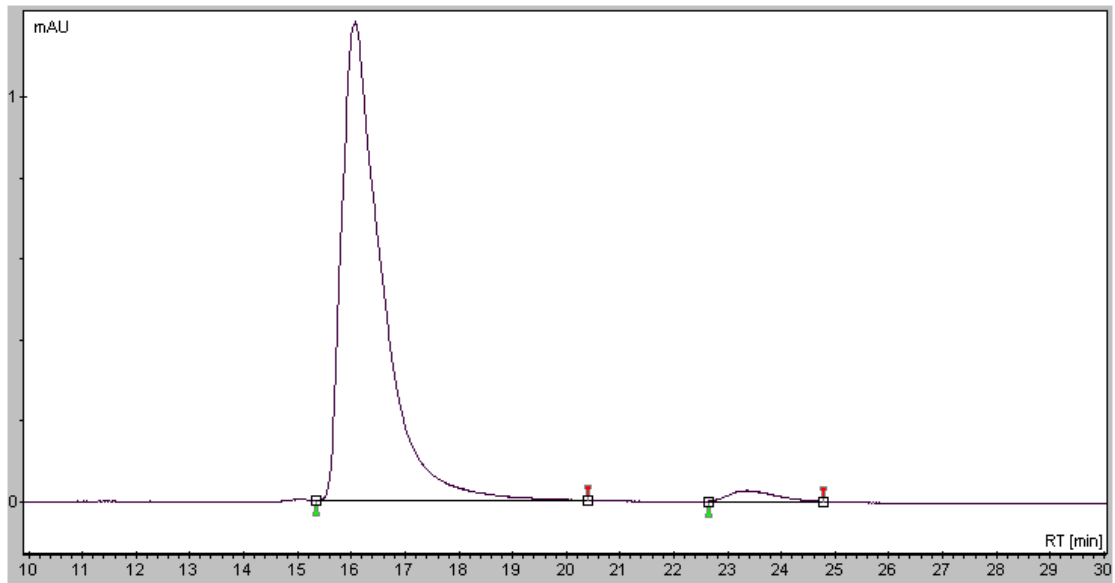

| # | Start time[min] | Time[min] | End time[min] | Area%  |
|---|-----------------|-----------|---------------|--------|
| 1 | 15.345          | 16.079    | 20.339        | 97.470 |
| 2 | 22.646          | 23.358    | 24.780        | 2.530  |

### <sup>1</sup>H NMR spectrum of 4o

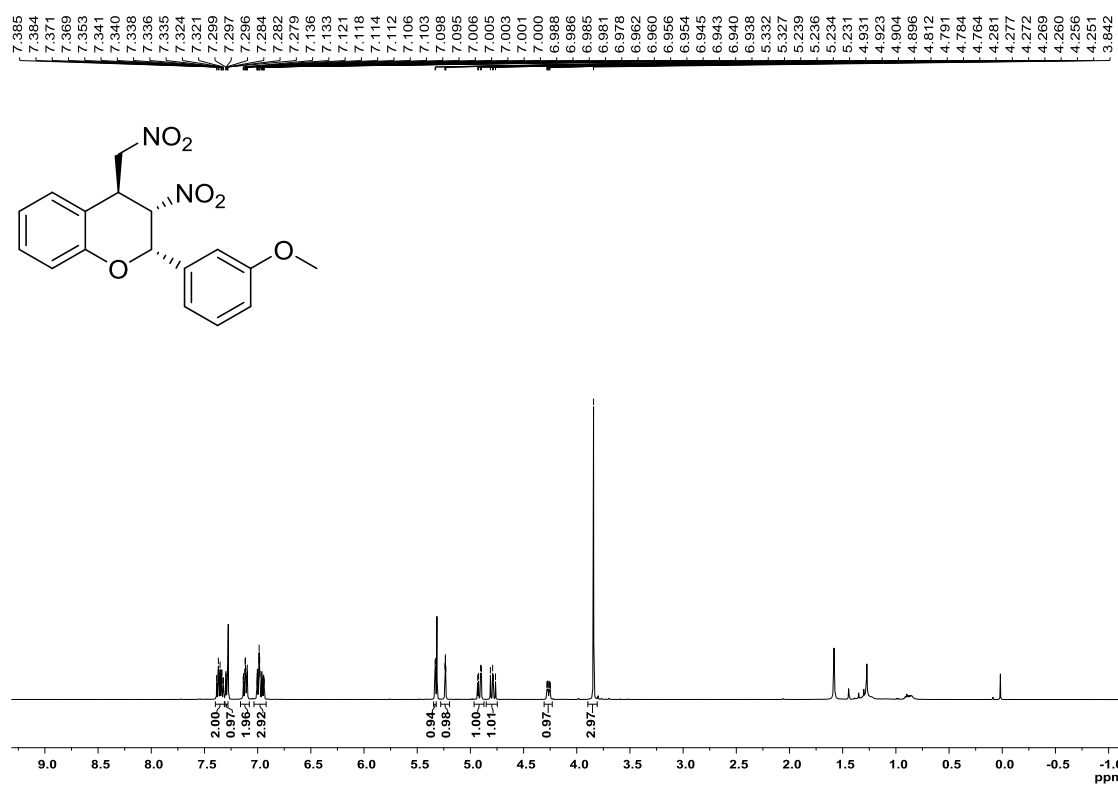

### <sup>13</sup>C NMR spectrum of 4o

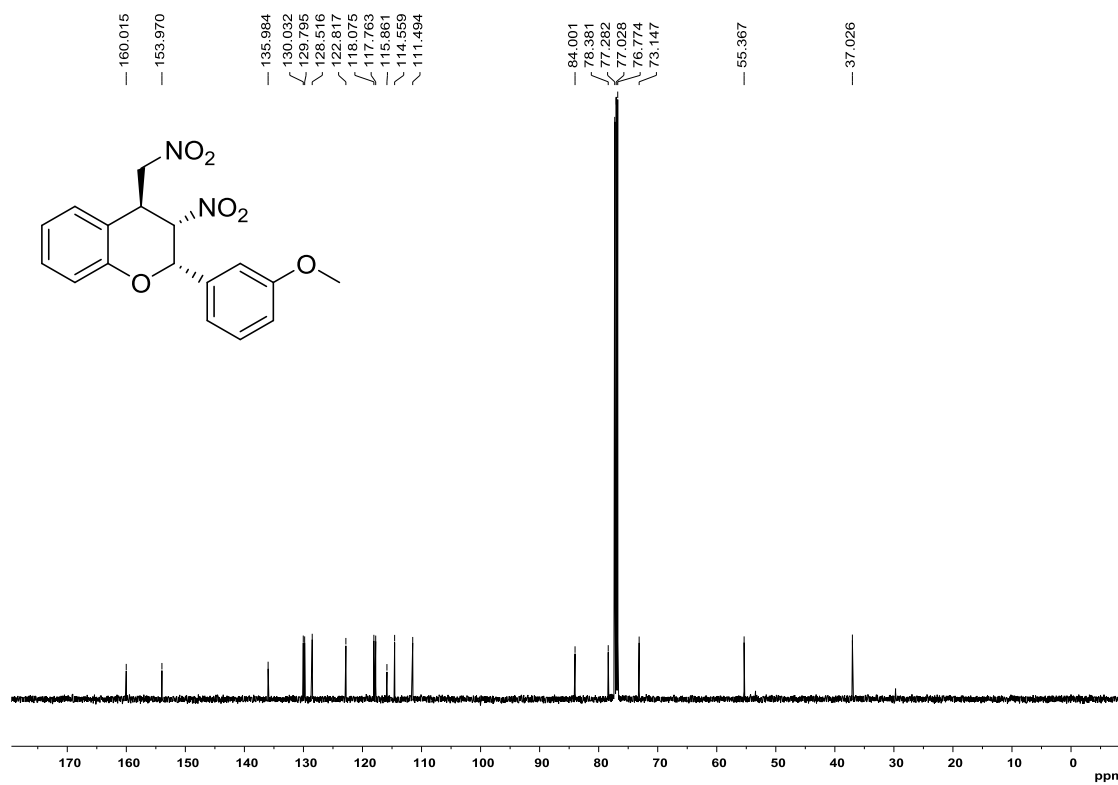

## HPLC chromatograms of 4o

### 4o-rac

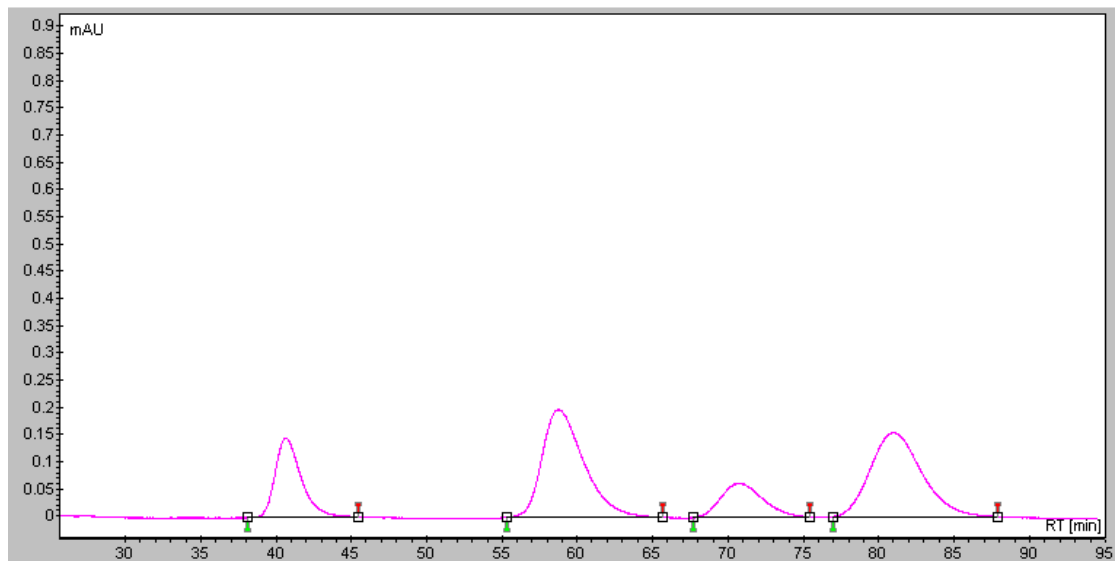

| # | Start time[min] | Time[min] | End time[min] | Area%  |
|---|-----------------|-----------|---------------|--------|
| 1 | 38.103          | 40.625    | 45.451        | 14.838 |
| 2 | 55.312          | 58.739    | 65.657        | 36.447 |
| 3 | 67.687          | 70.735    | 75.421        | 13.611 |
| 4 | 76.968          | 80.984    | 87.893        | 35.104 |

### 4o-chr

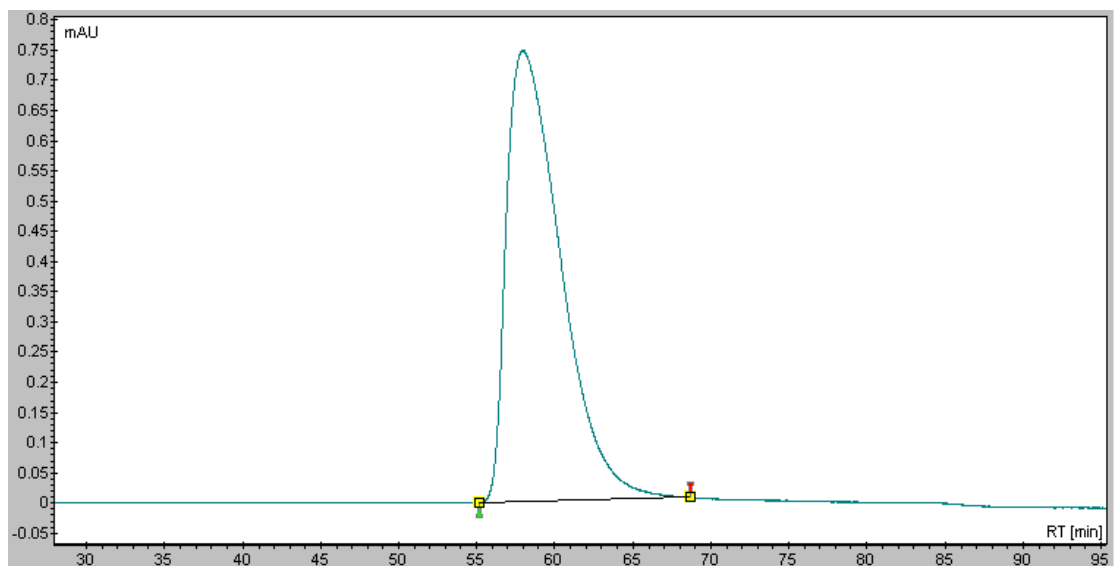

| # | Start time[min] | Time[min] | End time[min] | Area% |
|---|-----------------|-----------|---------------|-------|
| 1 | 55.164          | 57.966    | 68.693        | 100   |
| 2 |                 |           |               |       |

### <sup>1</sup>H NMR spectrum of 4p

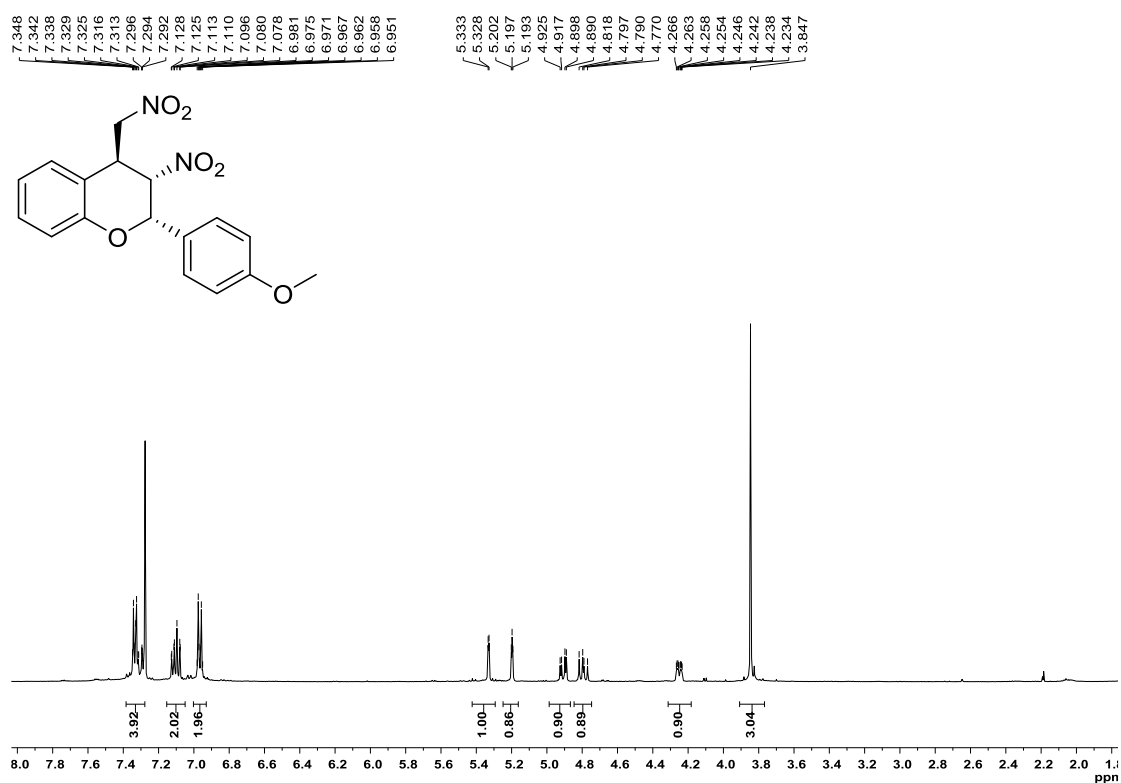

### <sup>13</sup>C NMR spectrum of 4p

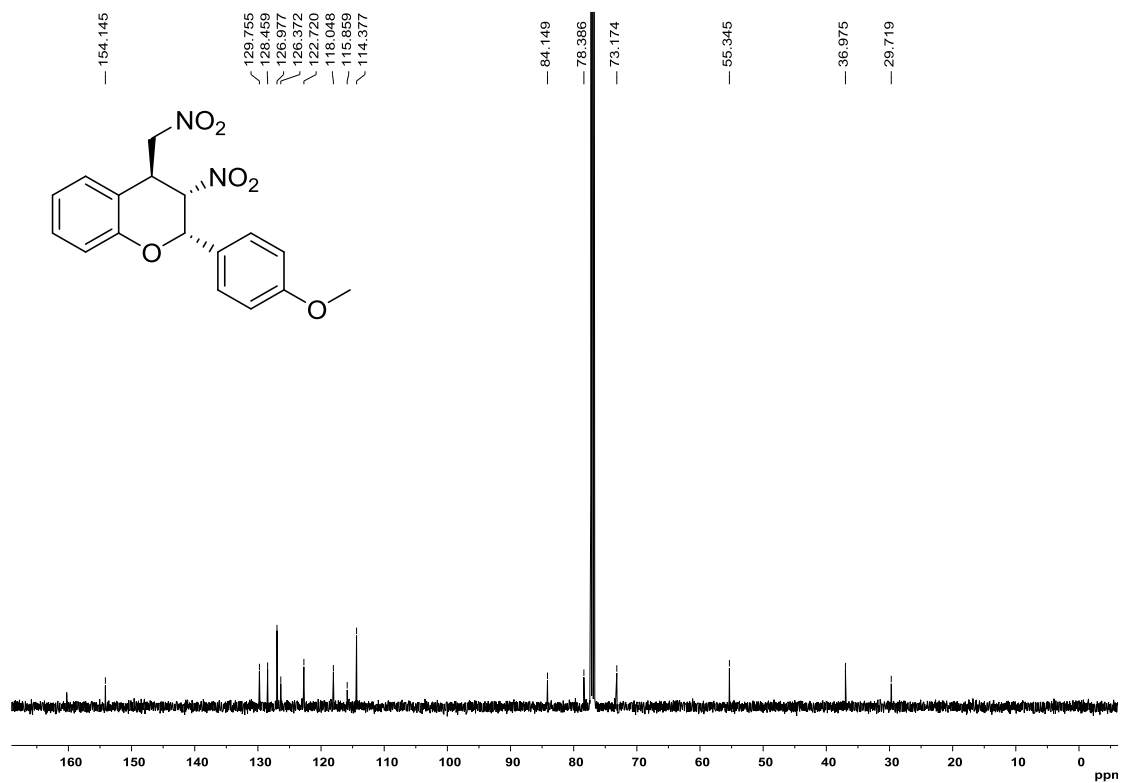



## HPLC chromatograms of 4p

### 4p-rac

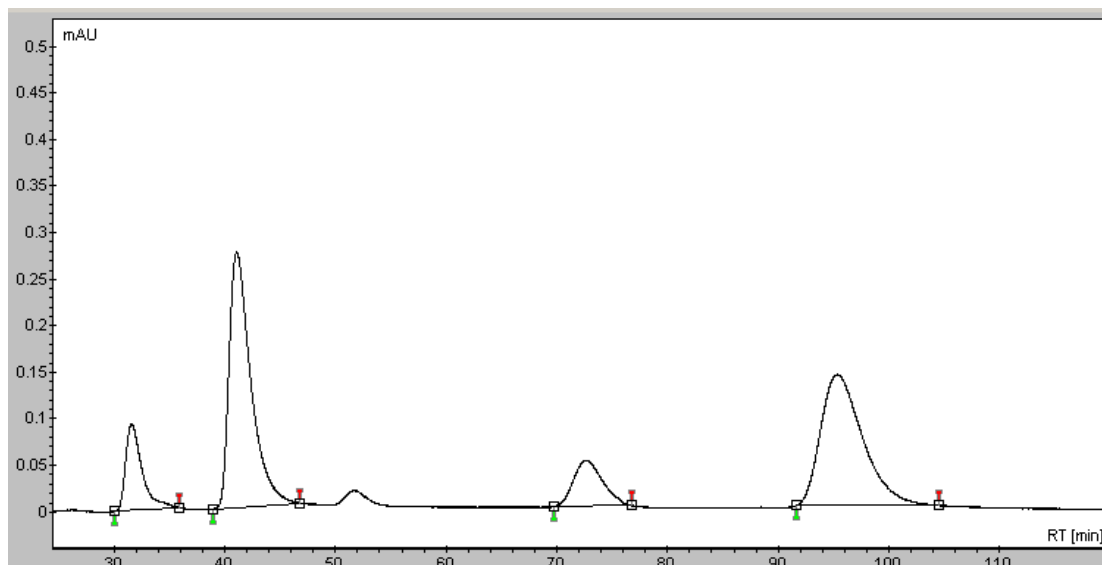

| # | Start time[min] | Time[min] | End time[min] | Area%  |
|---|-----------------|-----------|---------------|--------|
| 1 | 29.907          | 31.562    | 35.813        | 10.000 |
| 2 | 39.081          | 41.092    | 46.997        | 38.227 |
| 3 | 69.868          | 72.641    | 77.407        | 9.679  |
| 4 | 91.356          | 95.339    | 104.173       | 37.983 |

### 4p-chr

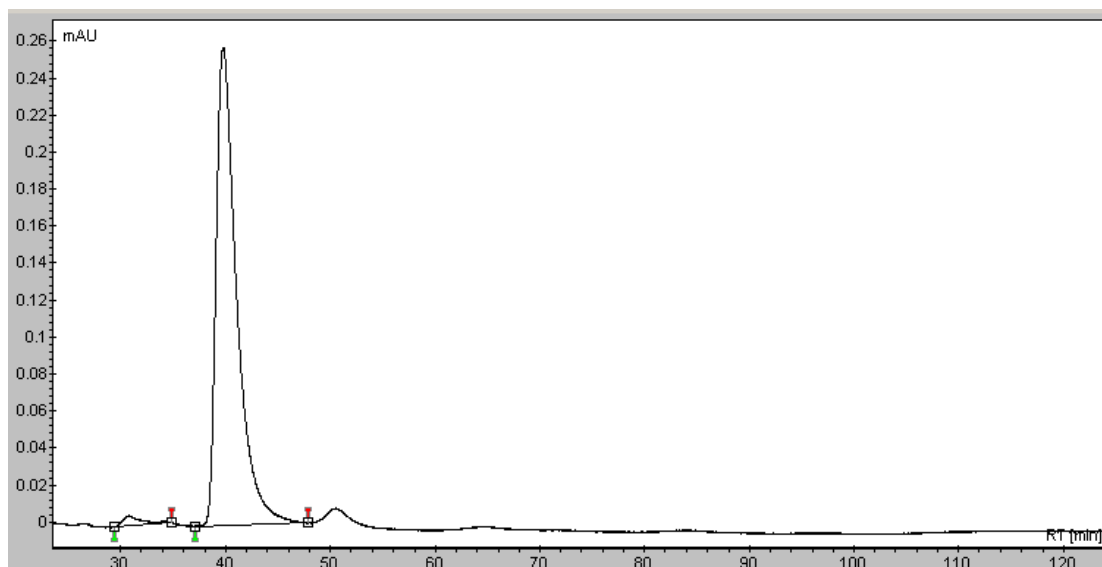

| # | Start time[min] | Time[min] | End time[min] | Area%  |
|---|-----------------|-----------|---------------|--------|
| 1 | 29.308          | 30.696    | 32.956        | 1.357  |
| 2 | 37.046          | 39.772    | 47.659        | 98.643 |

### <sup>1</sup>H NMR spectrum of 4q

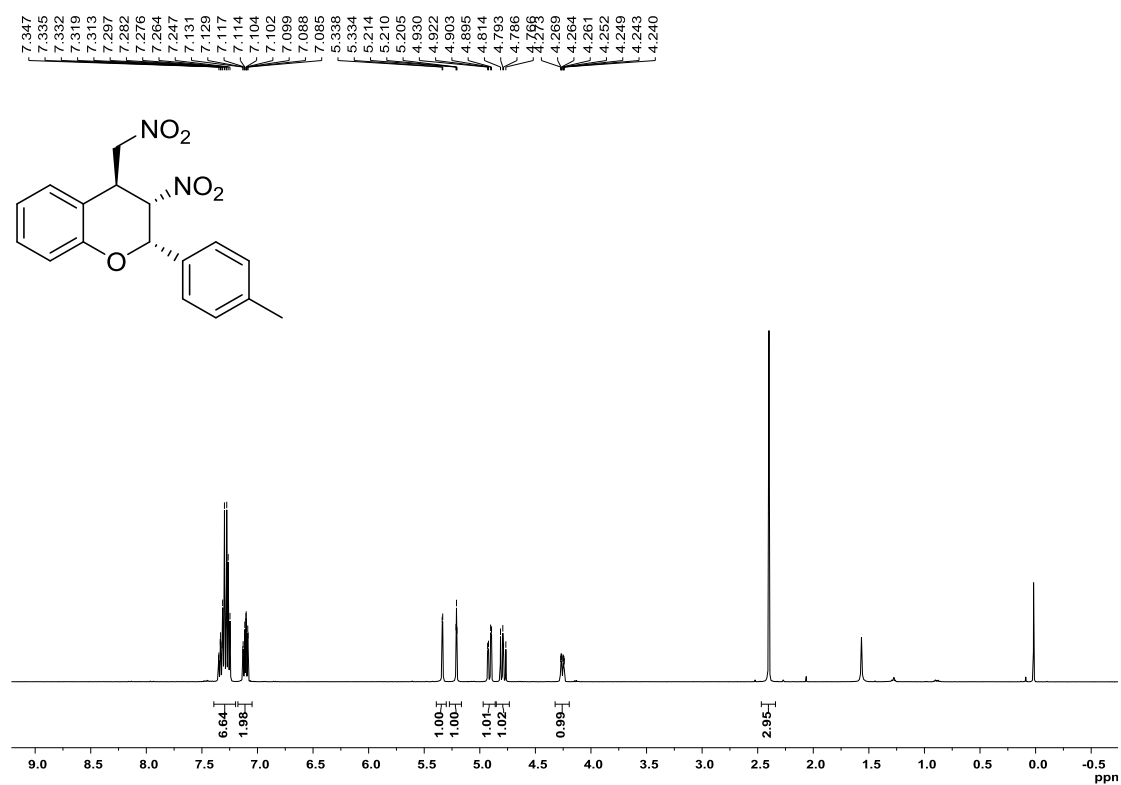

### <sup>13</sup>C NMR spectrum of 4q

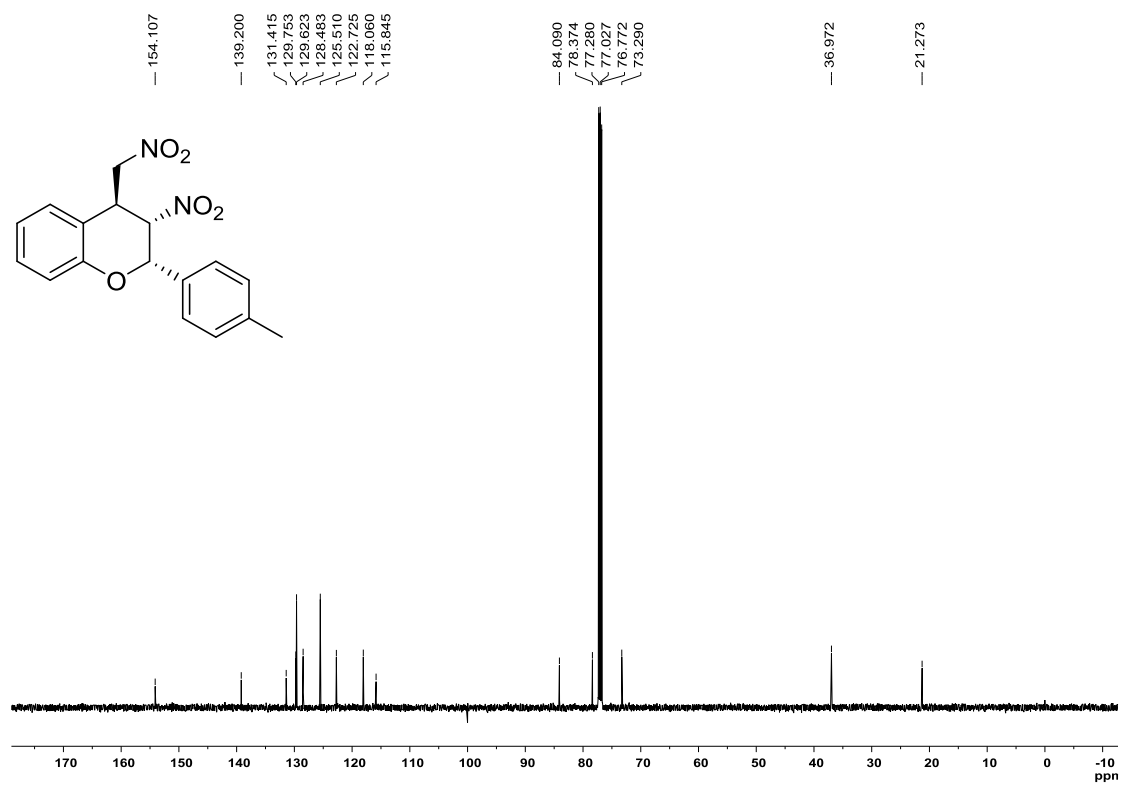

## HPLC chromatograms of 4q

### 4q-rac

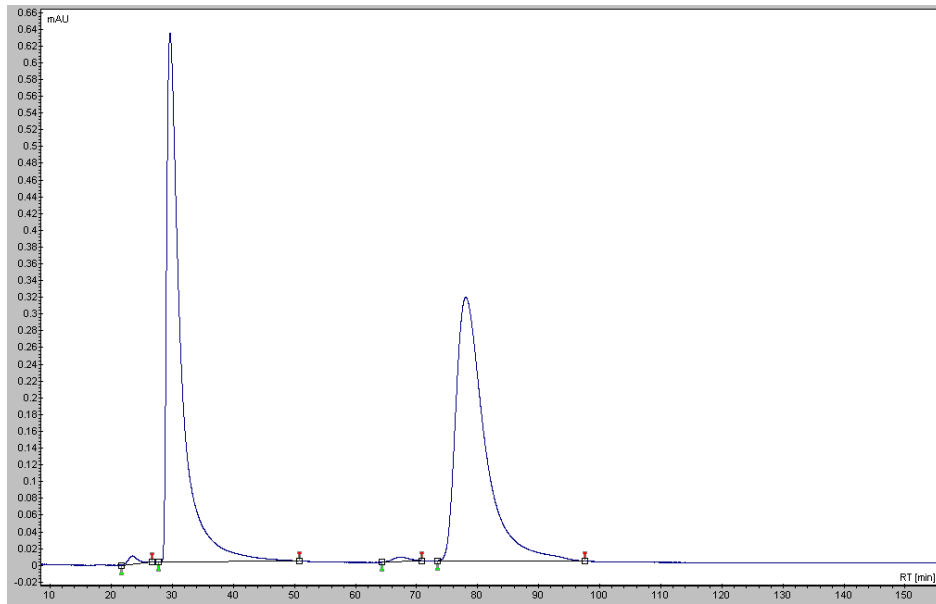

| # | Start time[min] | Time[min] | End time[min] | Area%  |
|---|-----------------|-----------|---------------|--------|
| 1 | 21.675          | 23.418    | 26.663        | 0.508  |
| 2 | 27.814          | 29.639    | 50.832        | 49.165 |
| 3 | 64.289          | 67.271    | 70.900        | 0.478  |
| 4 | 73.466          | 78.101    | 97.635        | 49.849 |

### 4q-chr

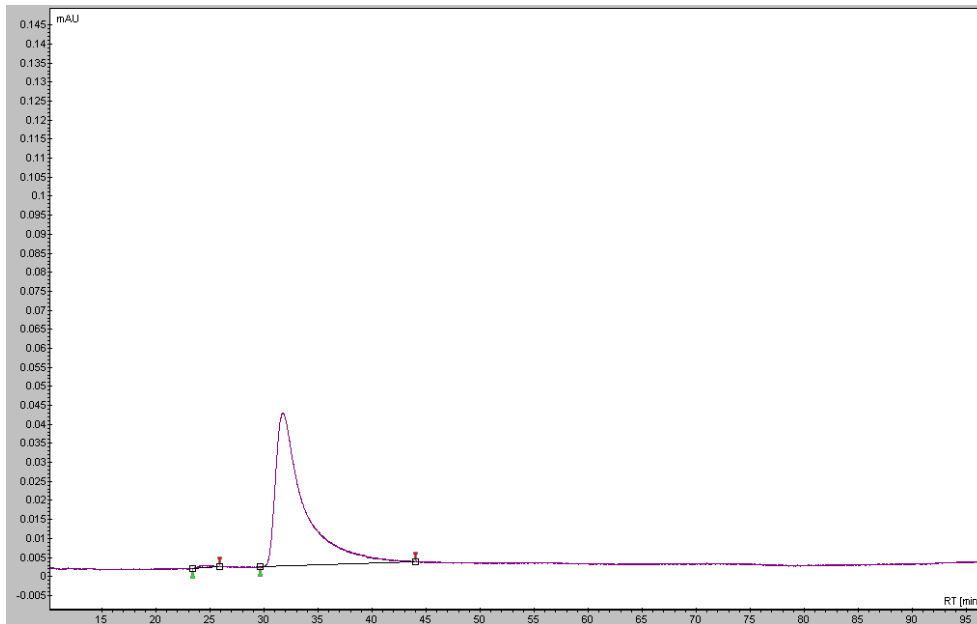

| # | Start time[min] | Time[min] | End time[min] | Area%  |
|---|-----------------|-----------|---------------|--------|
| 1 | 23.421          | 24.325    | 25.881        | 0.736  |
| 2 | 29.628          | 31.749    | 44.032        | 99.264 |

### <sup>1</sup>H NMR spectrum of 4r

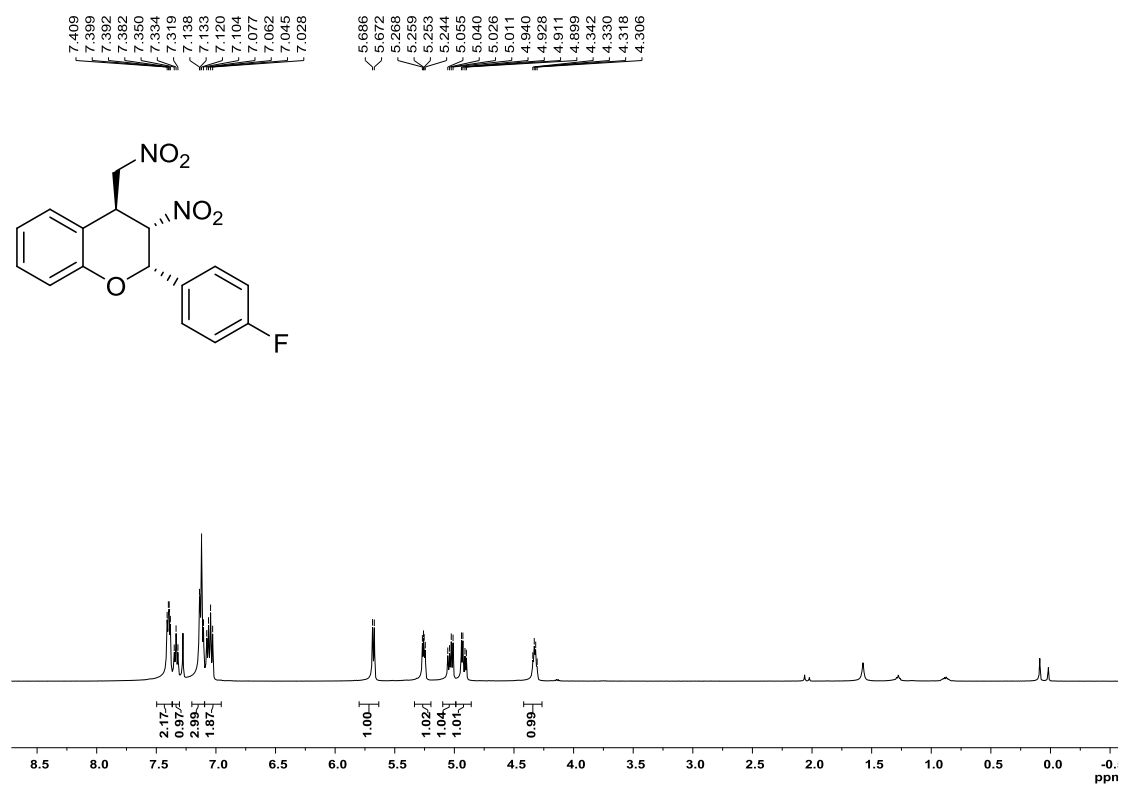

### <sup>13</sup>C NMR Spectra of 4r

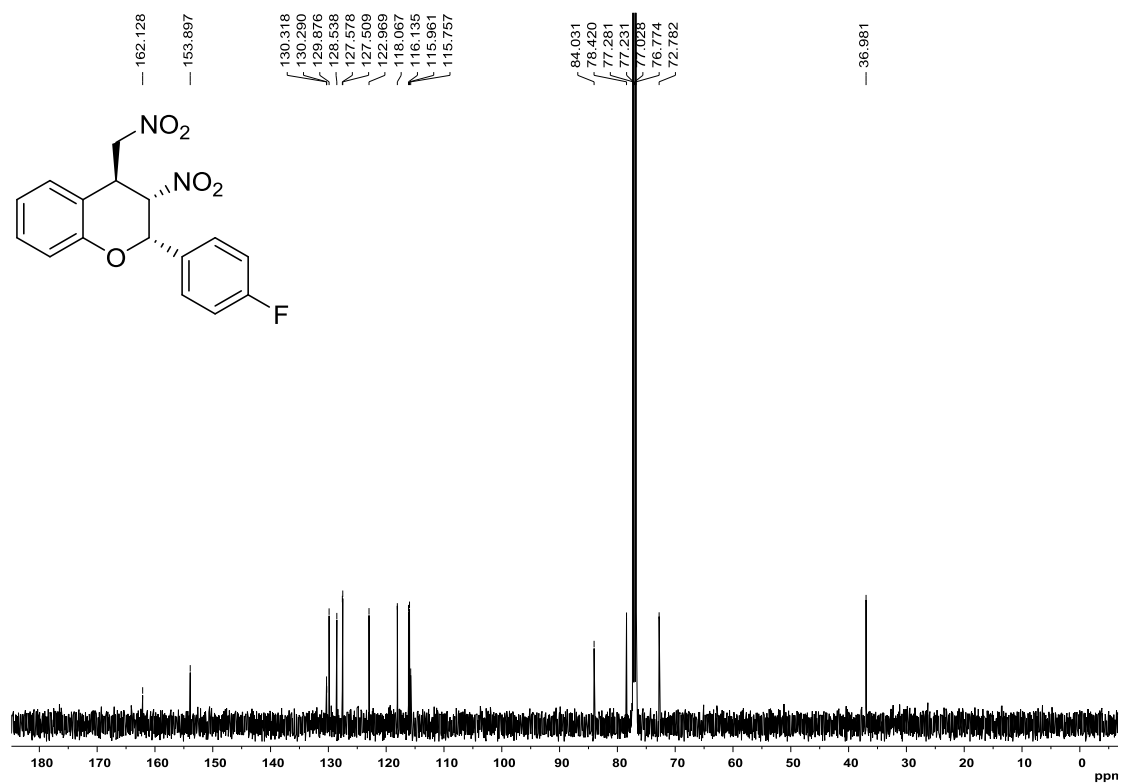

## HPLC chromatograms of 4r

### 4r-rac

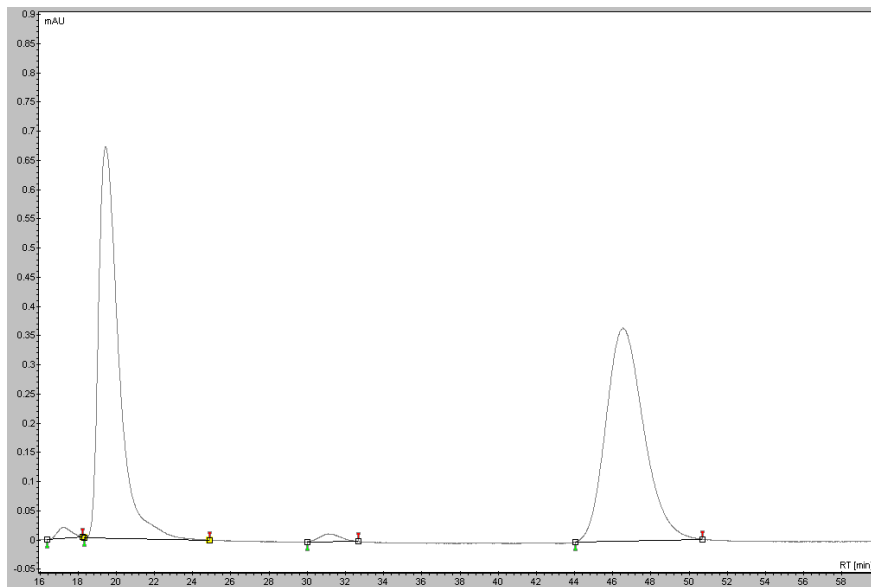

| # | Start time[min] | Time[min] | End time[min] | Area%  |
|---|-----------------|-----------|---------------|--------|
| 1 | 16.377          | 17.247    | 18.246        | 0.955  |
| 2 | 18.321          | 19.446    | 24.902        | 48.391 |
| 3 | 29.987          | 31.149    | 32.679        | 1.029  |
| 4 | 44.045          | 46.543    | 50.701        | 49.626 |

### 4r-chr

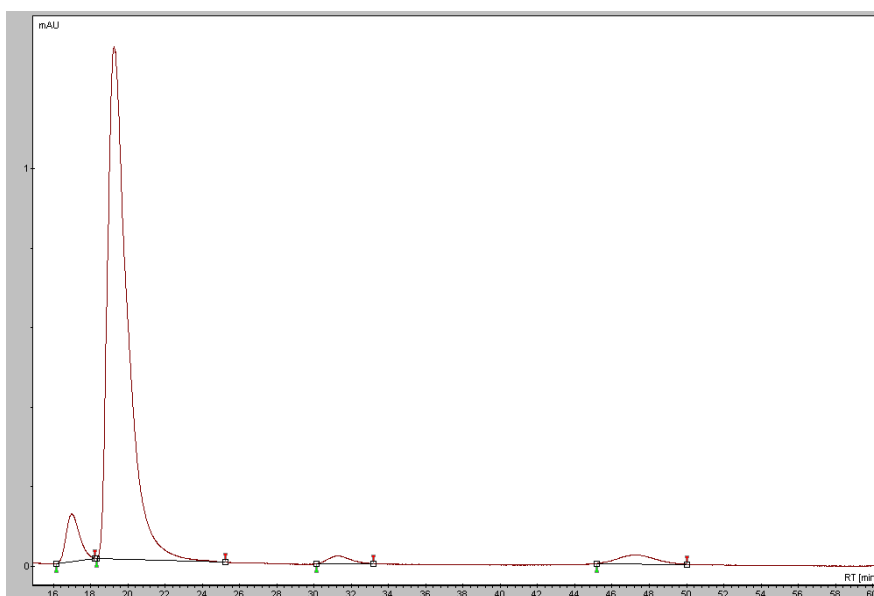

| # | Start time[min] | Time[min] | End time[min] | Area%  |
|---|-----------------|-----------|---------------|--------|
| 1 | 16.171          | 16.981    | 18.237        | 5.715  |
| 2 | 18.309          | 19.273    | 25.219        | 89.772 |
| 3 | 30.134          | 31.255    | 33.198        | 1.580  |
| 4 | 45.166          | 47.156    | 50.010        | 2.932  |

### <sup>1</sup>H NMR spectrum of 4s

7.651  
7.644  
7.640  
7.639  
7.637  
7.632  
7.631  
7.491  
7.485  
7.483  
7.479  
7.472  
7.464  
7.426  
7.424  
7.417  
7.412  
7.410  
7.406  
7.405  
7.399  
7.391  
7.354  
7.340  
7.337  
7.337  
7.331  
7.329  
7.327  
7.323  
7.320  
7.315  
7.313  
7.311  
7.159  
7.157  
7.144  
7.142  
7.129  
7.127  
7.095  
7.079  
7.076  
5.626  
5.622  
5.452  
5.450  
5.448  
5.446  
4.933  
4.925  
4.905  
4.897  
4.845  
4.823  
4.817  
4.795  
4.428  
4.420  
4.406  
4.398

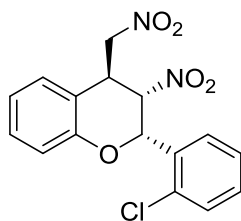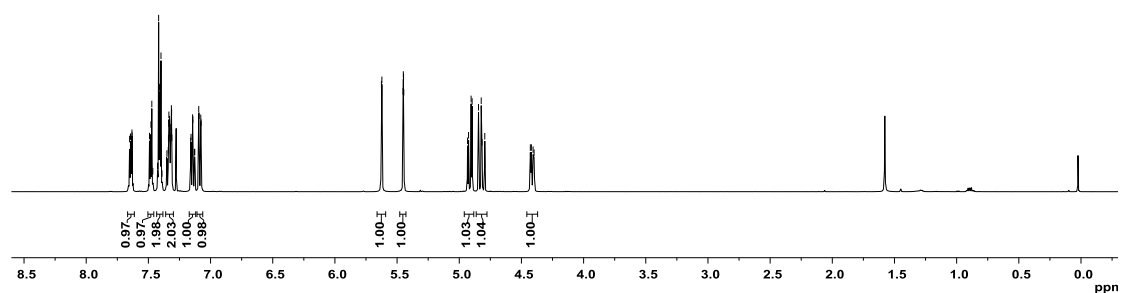

### <sup>13</sup>C NMR spectrum of 4s

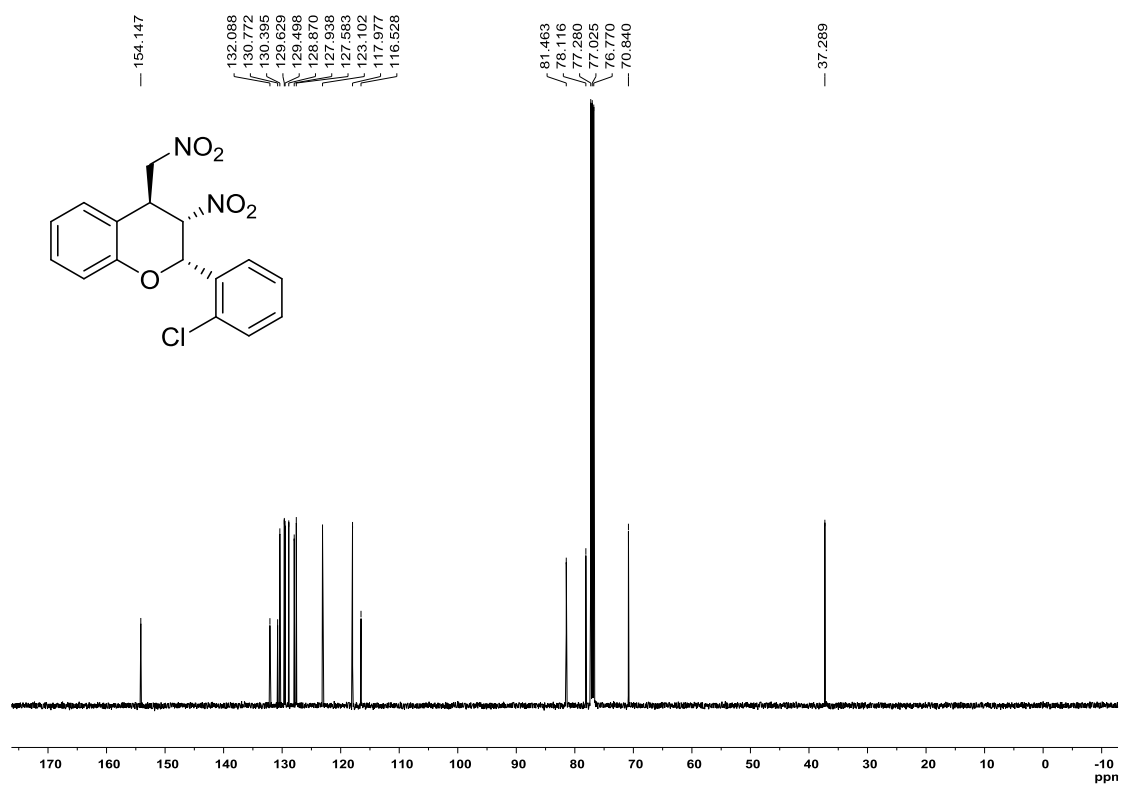

## HPLC chromatograms of 4s

### 4s-rac

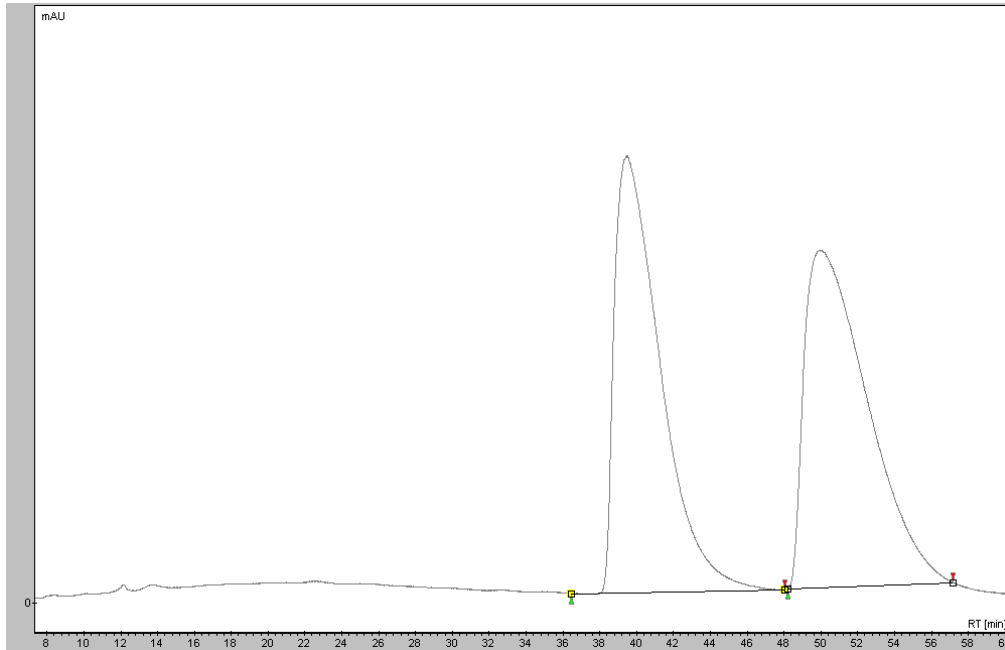

| # | Start time[min] | Time[min] | End time[min] | Area%  |
|---|-----------------|-----------|---------------|--------|
| 1 | 36.449          | 39.477    | 48.060        | 48.363 |
| 2 | 48.185          | 49.983    | 57.188        | 51.637 |

### 4s-chr

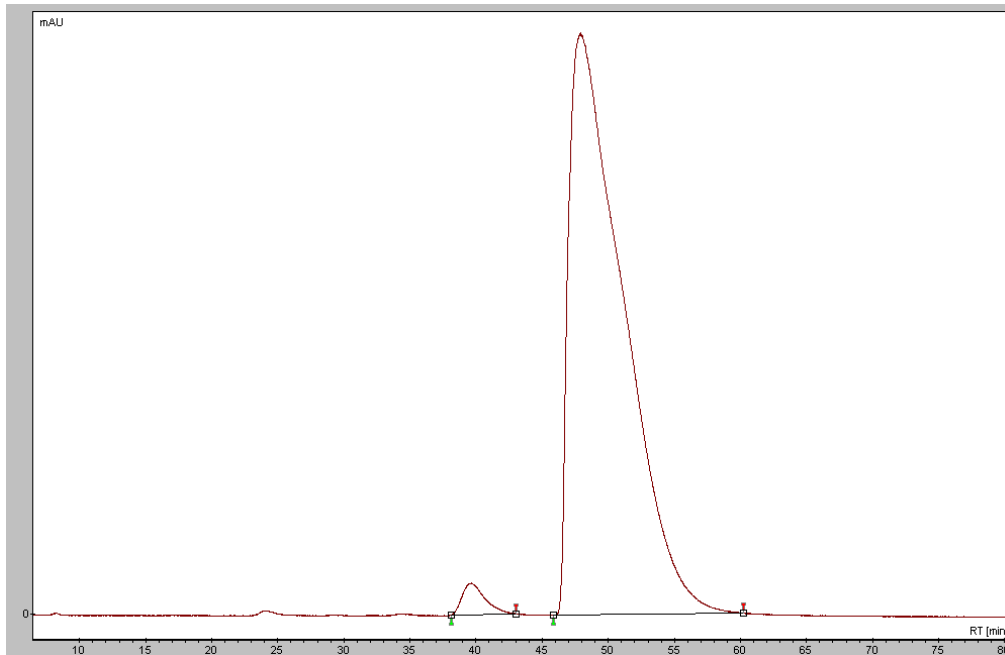

| # | Start time[min] | Time[min] | End time[min] | Area%  |
|---|-----------------|-----------|---------------|--------|
| 1 | 38.094          | 39.612    | 43.006        | 2.218  |
| 2 | 45.850          | 47.916    | 60.243        | 97.782 |

### <sup>1</sup>H NMR spectrum of 4t

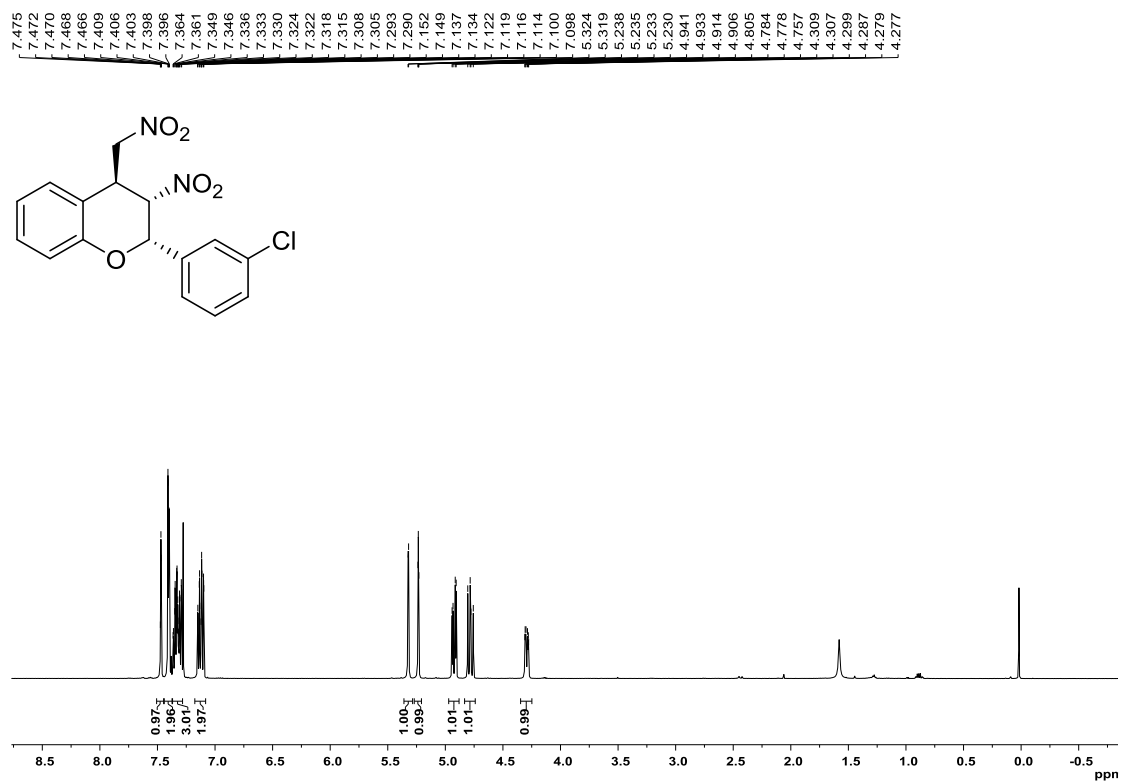

### <sup>13</sup>C NMR spectrum of 4t

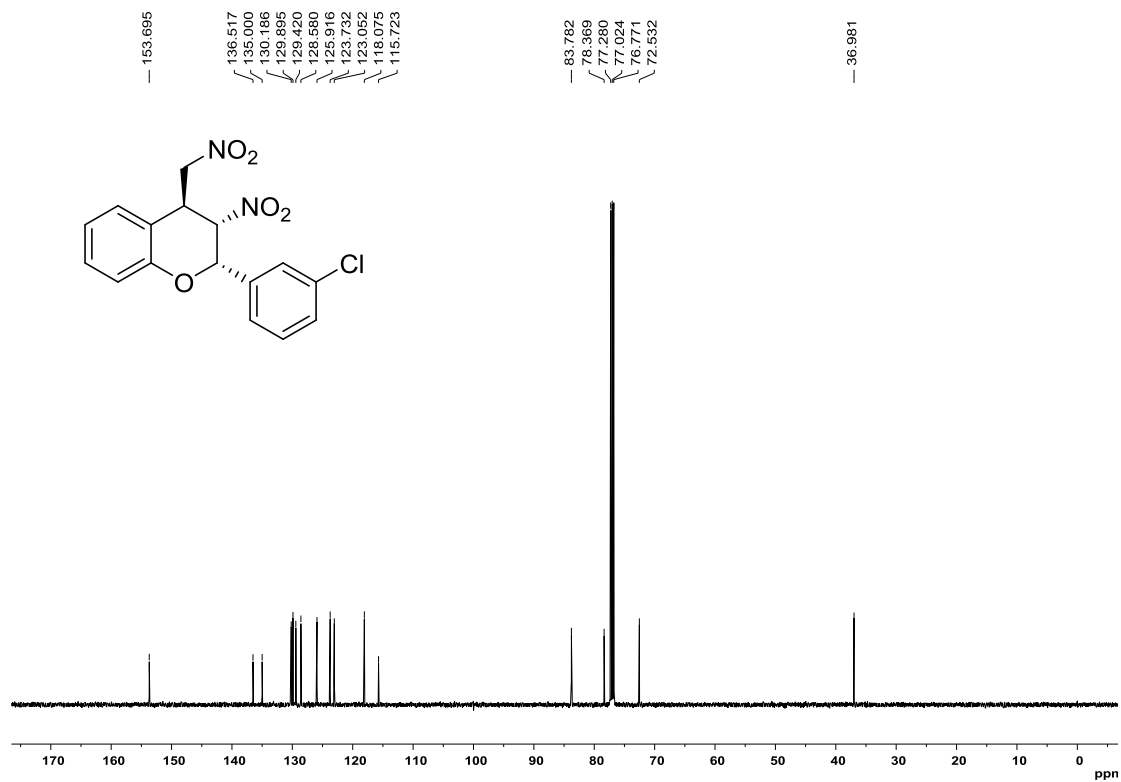



## HPLC chromatograms of 4t

### 4t-rac

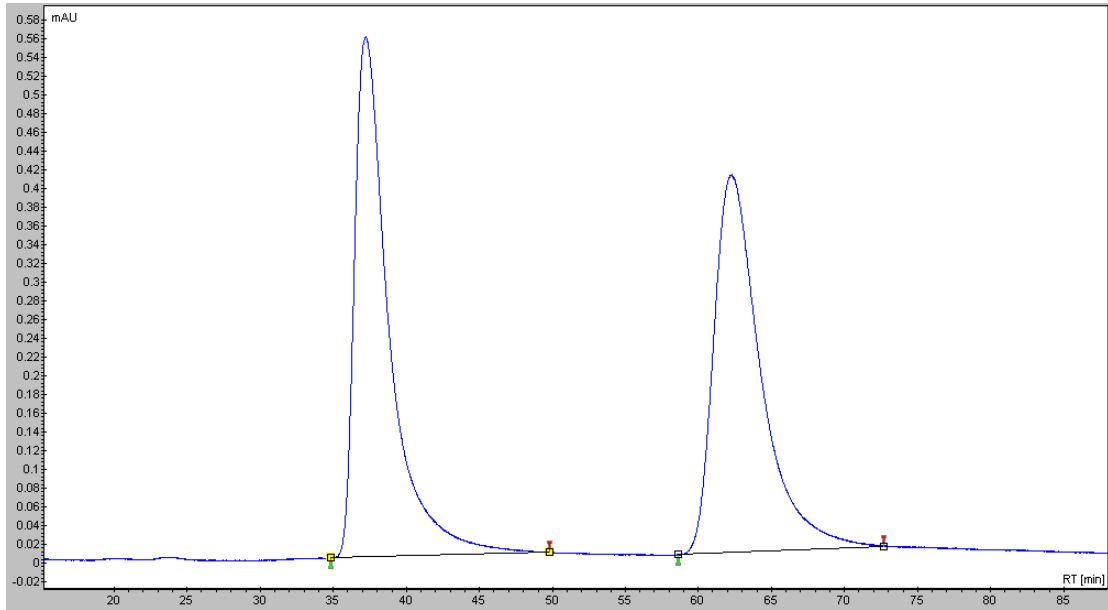

| # | Start time[min] | Time[min] | End time[min] | Area%  |
|---|-----------------|-----------|---------------|--------|
| 1 | 34.833          | 37.213    | 49.804        | 50.496 |
| 2 | 58.587          | 62.218    | 72.660        | 49.504 |

### 4t-chr

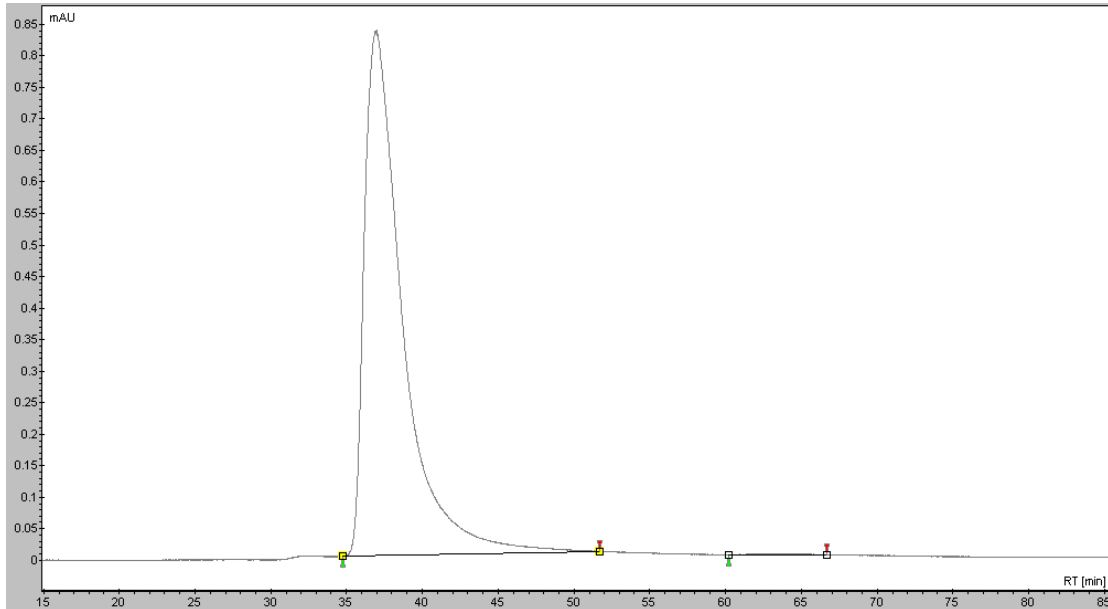

| # | Start time[min] | Time[min] | End time[min] | Area%  |
|---|-----------------|-----------|---------------|--------|
| 1 | 34.770          | 36.973    | 51.714        | 99.799 |
| 2 | 60.213          | 63.151    | 66.707        | 0.201  |

### <sup>1</sup>H NMR spectrum of 4u

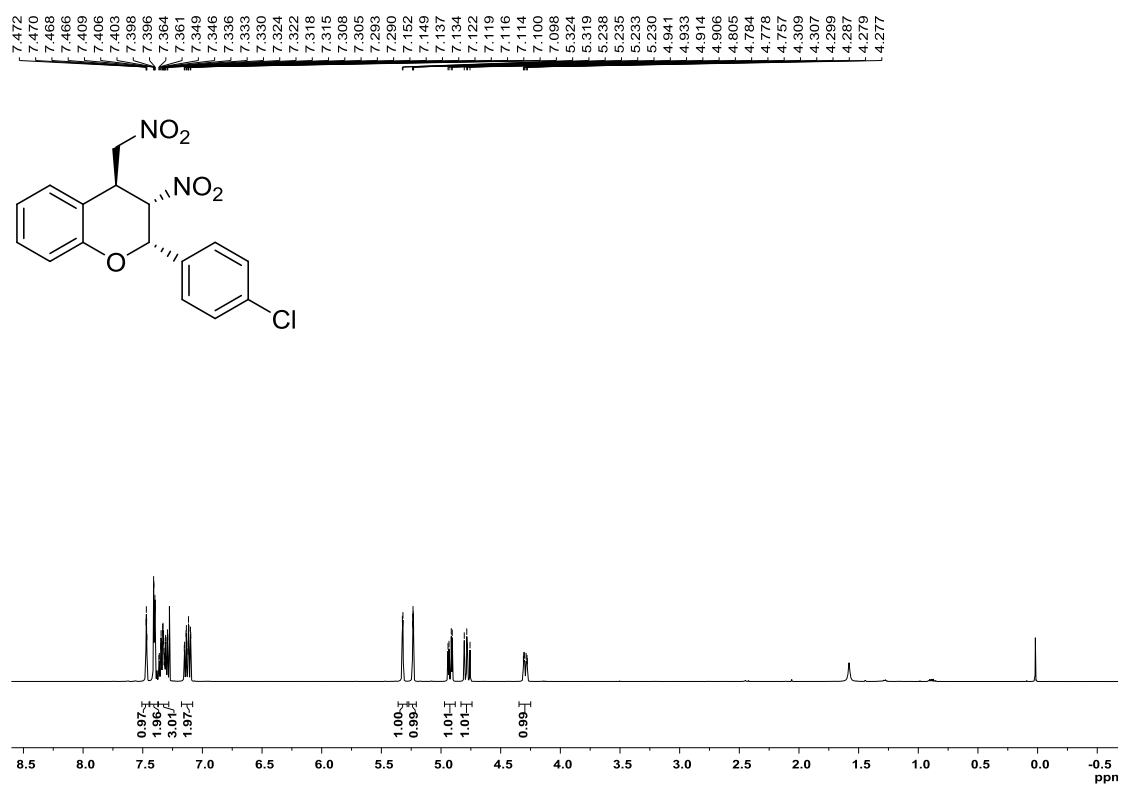

### <sup>13</sup>C NMR spectrum of 4u

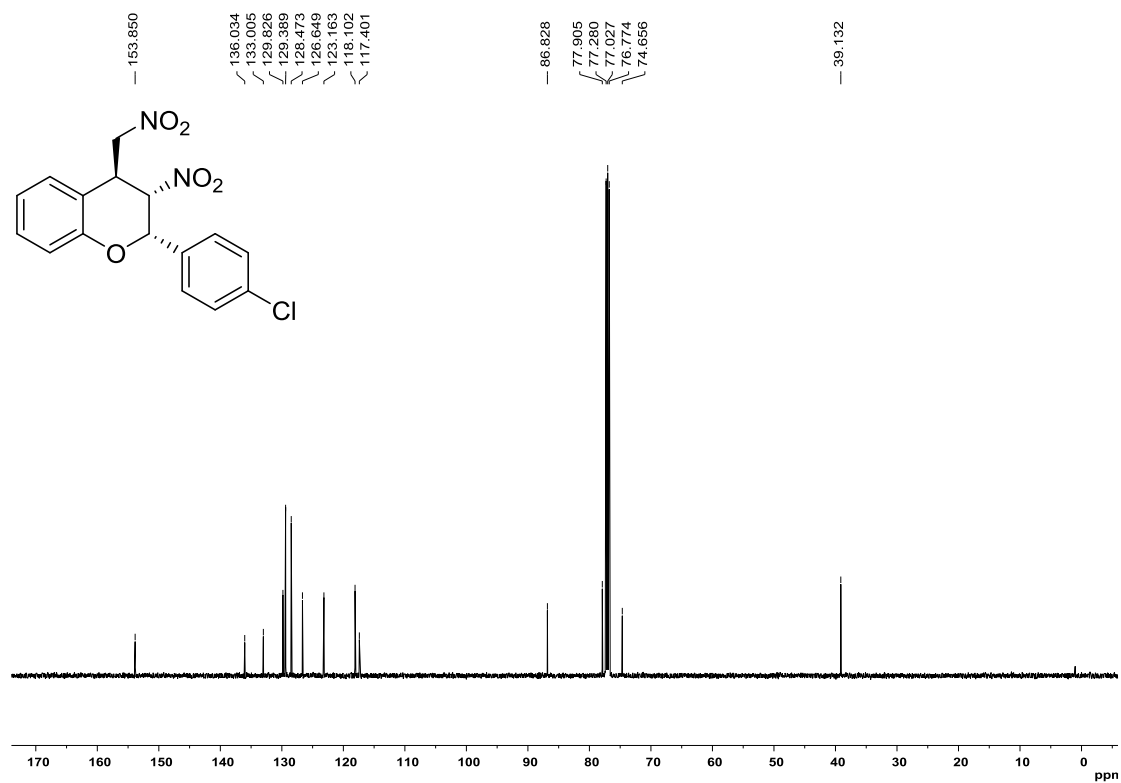

## HPLC chromatograms of 4u

### 4u-rac

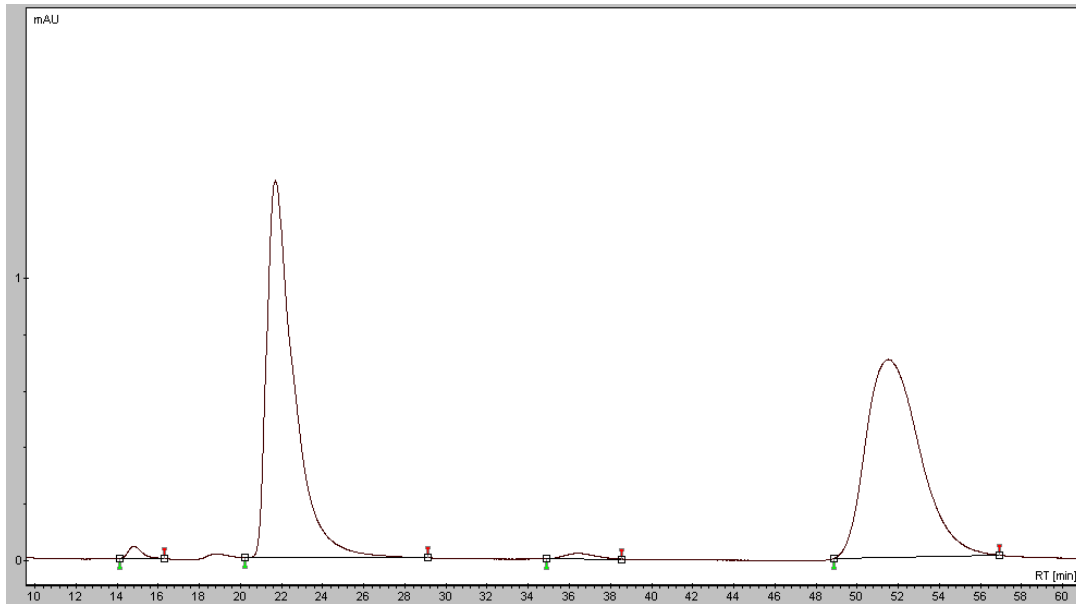

| # | Start time[min] | Time[min] | End time[min] | Area%  |
|---|-----------------|-----------|---------------|--------|
| 1 | 14.128          | 14.835    | 16.290        | 0.829  |
| 2 | 20.227          | 21.712    | 29.106        | 48.009 |
| 3 | 34.896          | 36.440    | 38.525        | 0.798  |
| 4 | 48.870          | 51.515    | 56.899        | 50.364 |

### 4u-chr

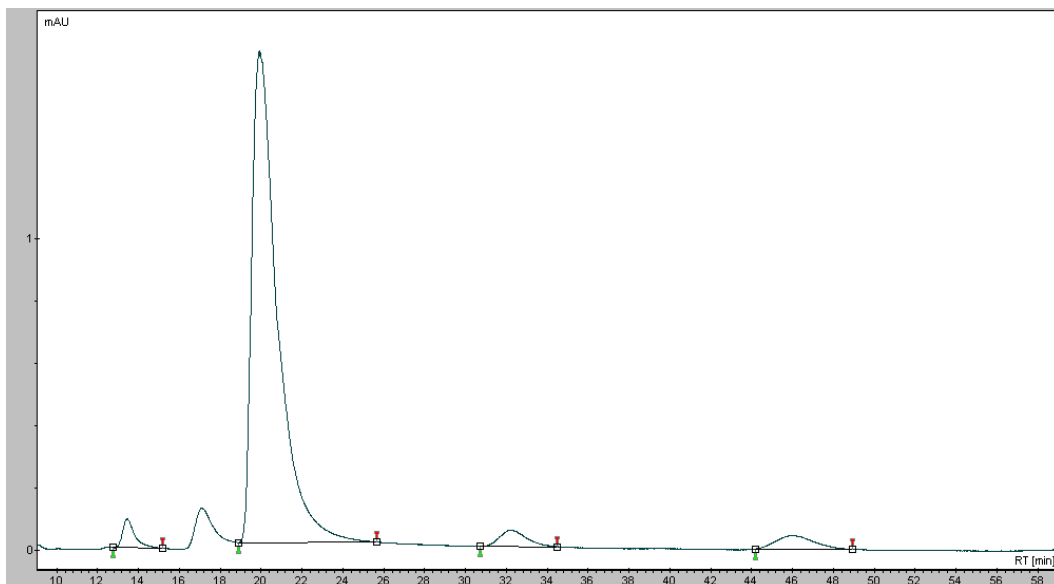

| # | Start time[min] | Time[min] | End time[min] | Area%  |
|---|-----------------|-----------|---------------|--------|
| 1 | 12.752          | 13.449    | 15.191        | 2.012  |
| 2 | 18.884          | 19.926    | 25.643        | 91.363 |
| 3 | 30.730          | 32.228    | 34.493        | 2.640  |
| 4 | 44.179          | 45.984    | 48.918        | 3.985  |

### <sup>1</sup>H NMR spectrum of 4v

7.667  
7.664  
7.651  
7.648  
7.625  
7.622  
7.610  
7.607  
7.467  
7.465  
7.452  
7.450  
7.437  
7.434  
7.354  
7.351  
7.347  
7.340  
7.335  
7.332  
7.320  
7.317  
7.162  
7.160  
7.148  
7.146  
7.144  
7.132  
7.130  
7.089  
7.087  
7.073  
7.071  
5.584  
5.581  
5.490  
5.488  
5.486  
5.484  
4.937  
4.927  
4.908  
4.900  
4.898  
4.879  
4.871  
4.850  
4.438  
4.428  
4.418  
4.408

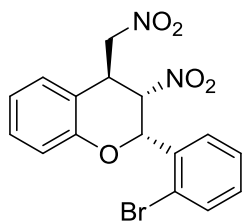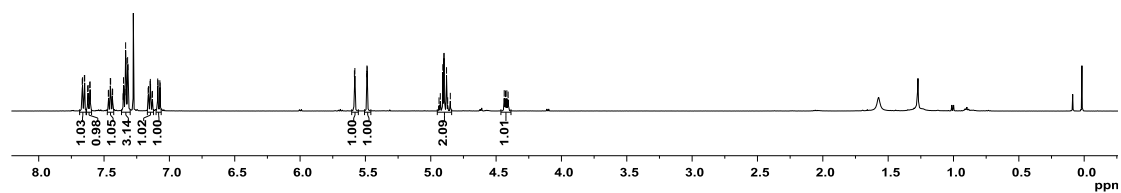

### <sup>13</sup>C NMR spectrum of 4v

154.196  
133.492  
132.780  
130.777  
129.646  
128.863  
128.363  
128.177  
123.134  
120.769  
118.006  
116.574  
81.465  
77.974  
77.280  
77.228  
77.027  
76.774  
73.022  
37.357

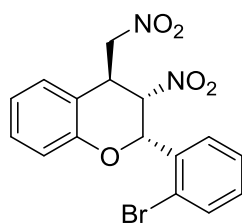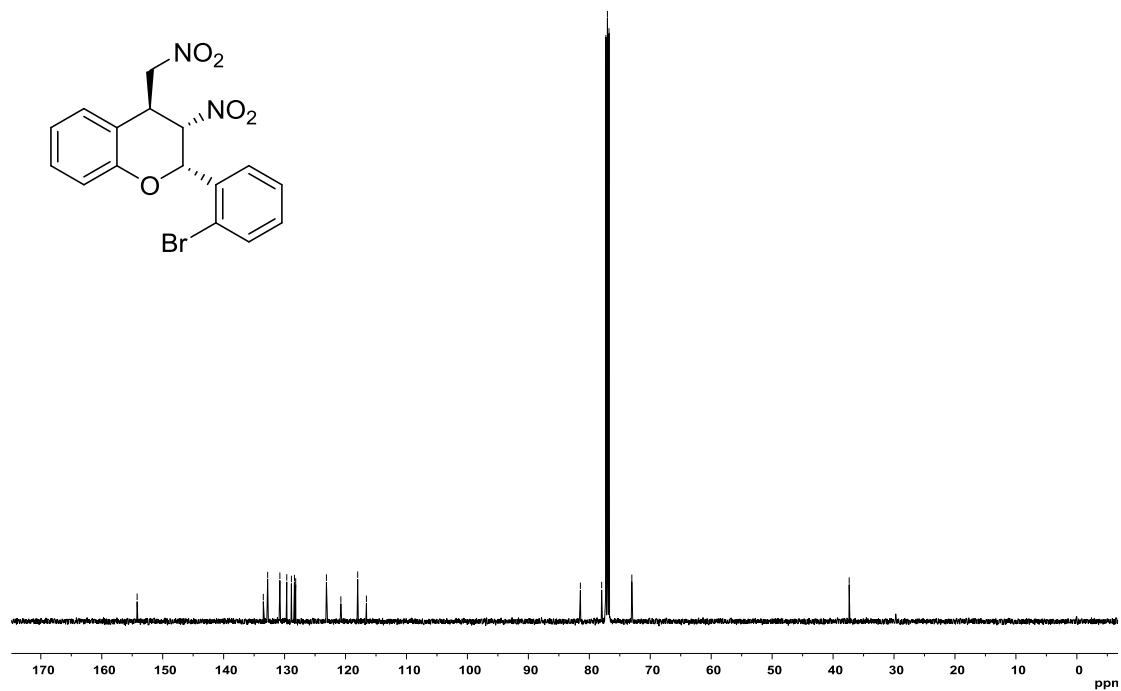

## HPLC chromatograms of 4v

### 4v-rac

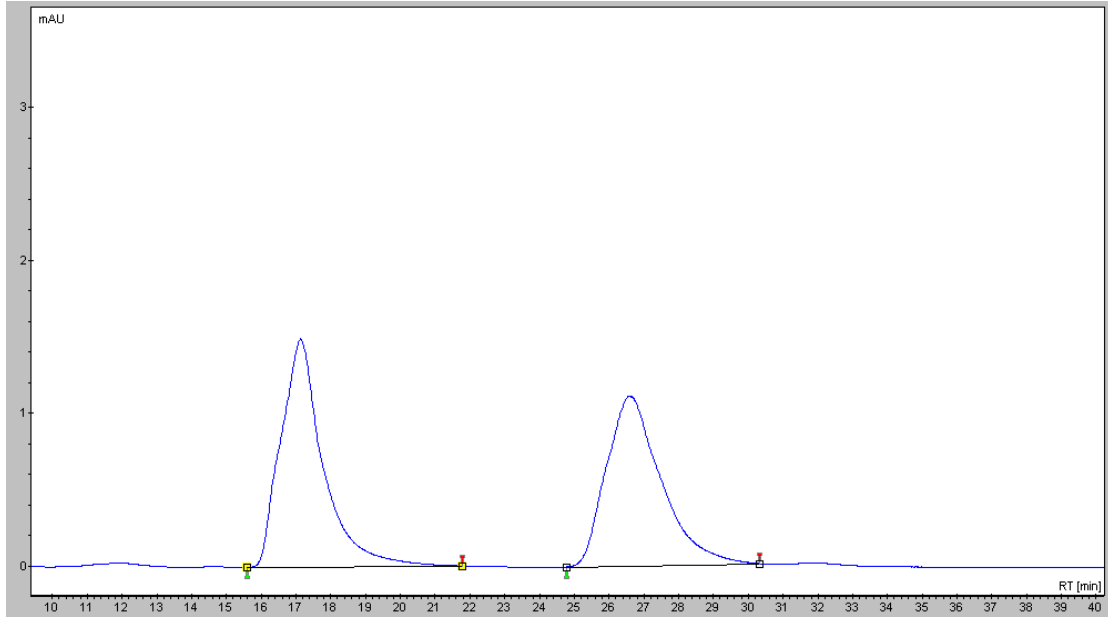

| # | Start time[min] | Time[min] | End time[min] | Area%  |
|---|-----------------|-----------|---------------|--------|
| 1 | 15.584          | 17.127    | 21.787        | 50.964 |
| 2 | 24.656          | 26.577    | 30.238        | 49.036 |

### 4v-chr

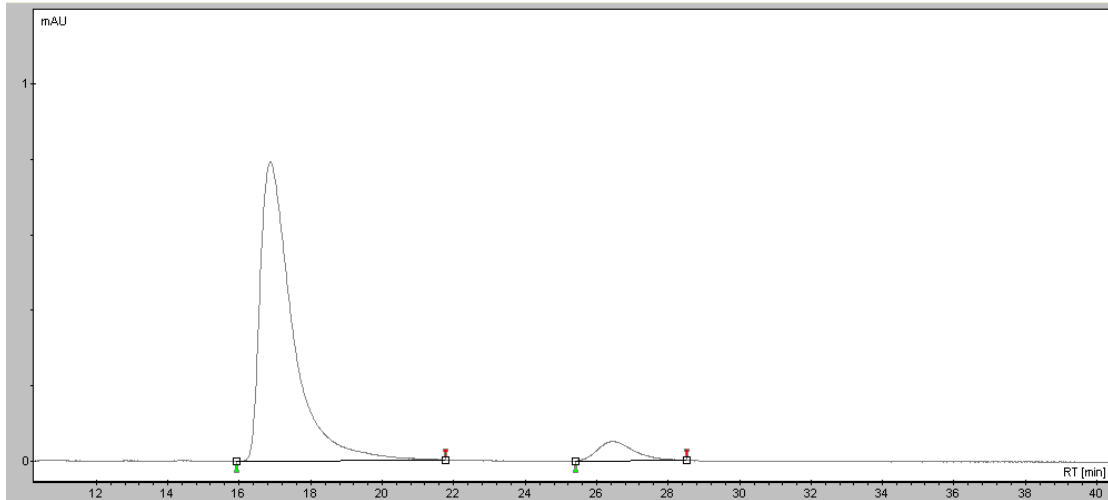

| # | Start time[min] | Time[min] | End time[min] | Area%  |
|---|-----------------|-----------|---------------|--------|
| 1 | 15.943          | 16.874    | 21.784        | 93.253 |
| 2 | 25.426          | 26.457    | 28.518        | 6.747  |



## HPLC chromatograms of 4w

### 4w-rac

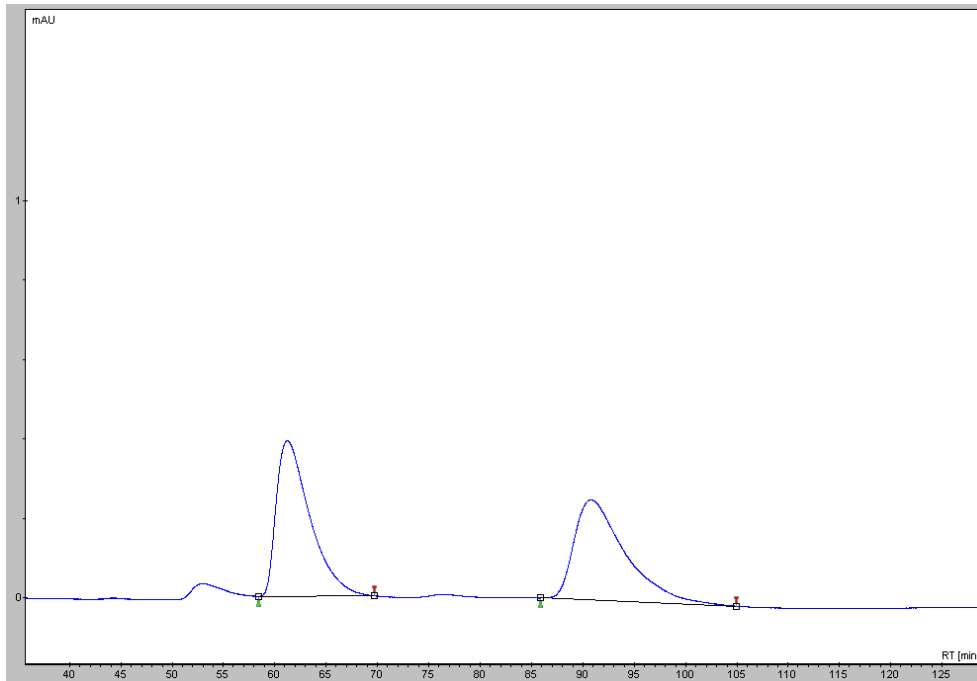

| # | Start time[min] | Time[min] | End time[min] | Area%  |
|---|-----------------|-----------|---------------|--------|
| 1 | 58.452          | 61.236    | 69.709        | 50.700 |
| 2 | 85.873          | 90.882    | 104.924       | 49.300 |

### 4w-chr

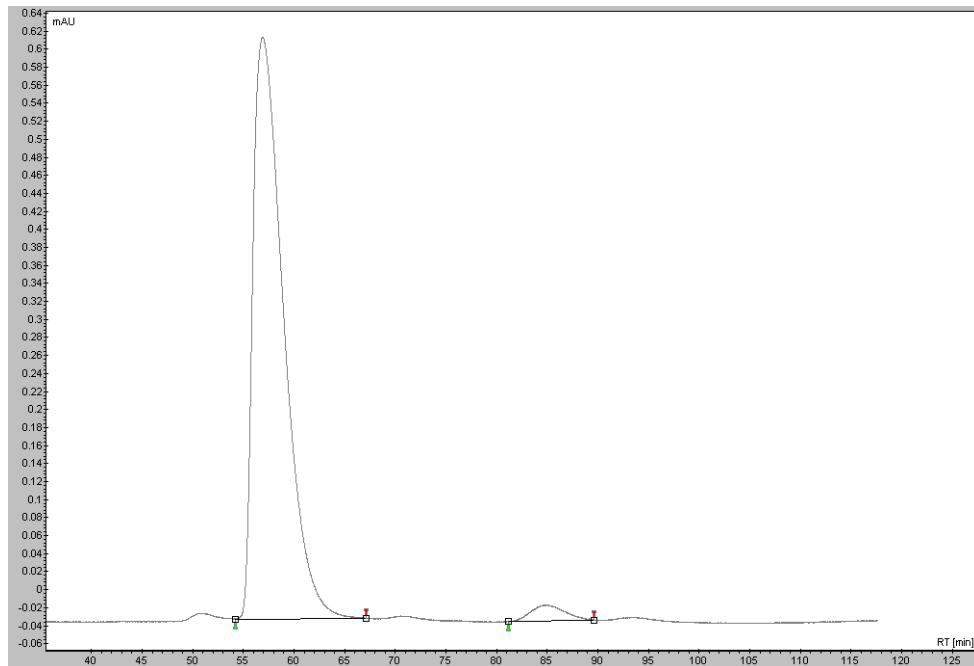

| # | Start time[min] | Time[min] | End time[min] | Area%  |
|---|-----------------|-----------|---------------|--------|
| 1 | 54.214          | 56.900    | 69.099        | 97.121 |
| 2 | 81.200          | 84.903    | 89.587        | 2.879  |

### <sup>1</sup>H NMR spectrum of 4x

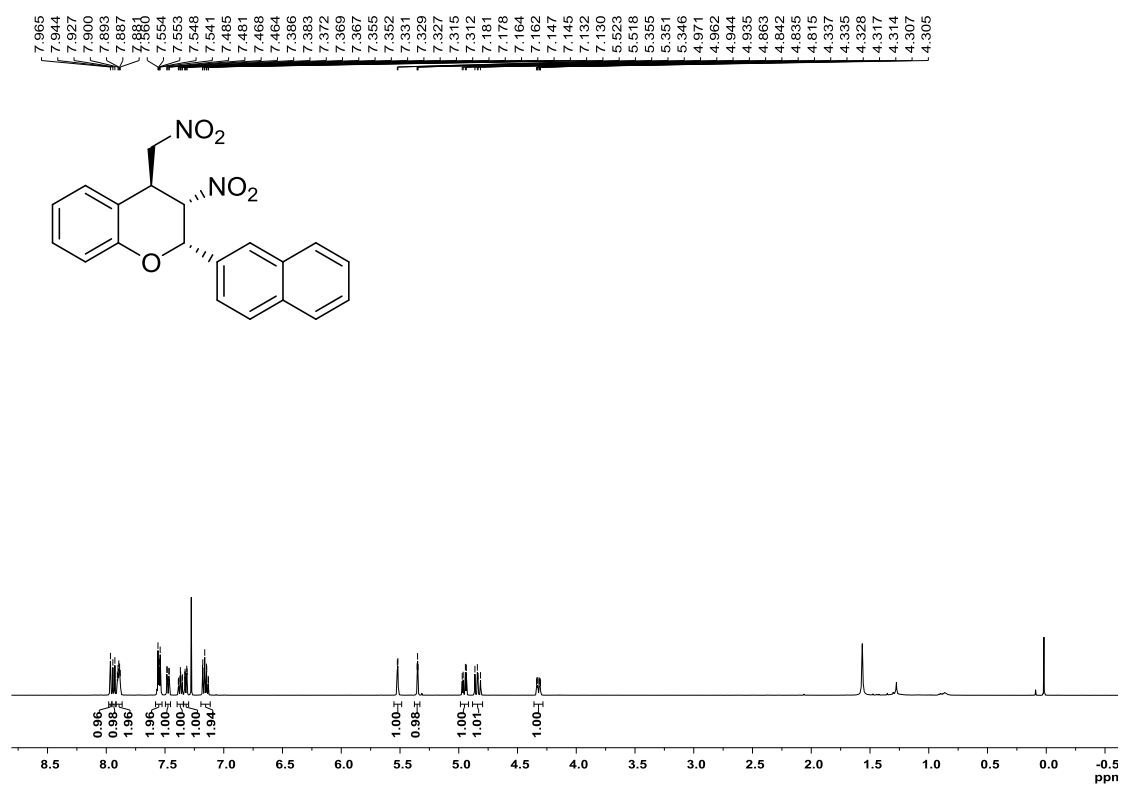

### <sup>13</sup>C NMR spectrum of 4x

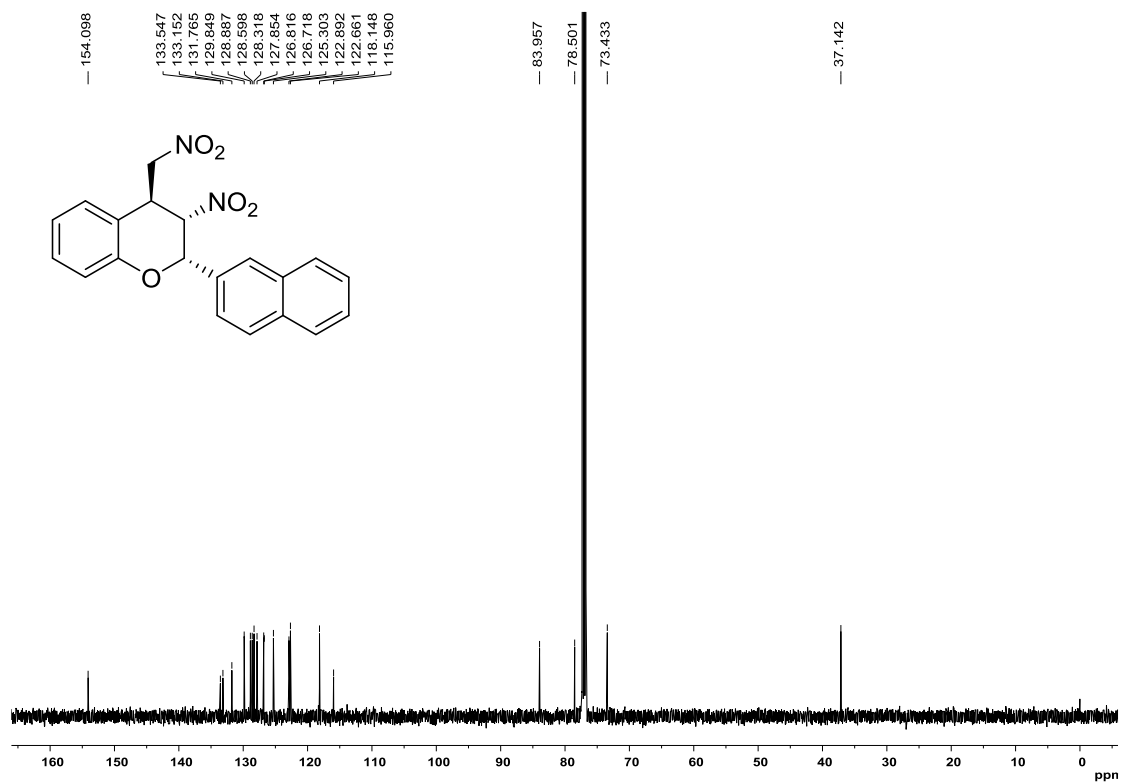



## HPLC chromatograms of 4x

### 4x-rac

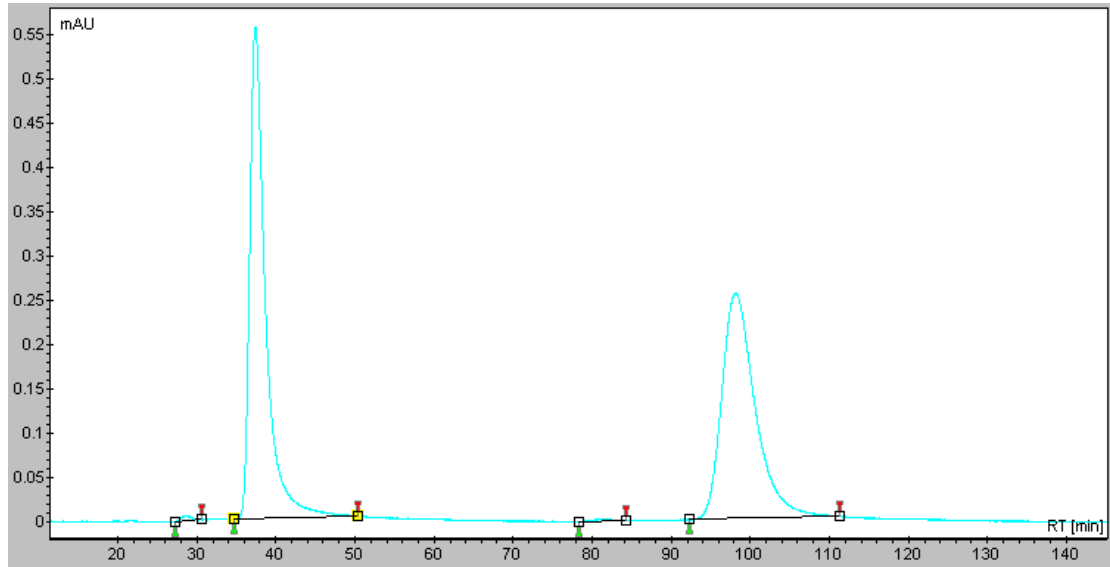

| # | Start time[min] | Time[min] | End time[min] | Area%  |
|---|-----------------|-----------|---------------|--------|
| 1 | 27.386          | 28.627    | 30.57         | 0.326  |
| 2 | 34.816          | 37.405    | 50.314        | 50.428 |
| 3 | 78.372          | 81.058    | 84.389        | 0.241  |
| 4 | 92.348          | 98.175    | 111.242       | 49.005 |

### 4x-chr

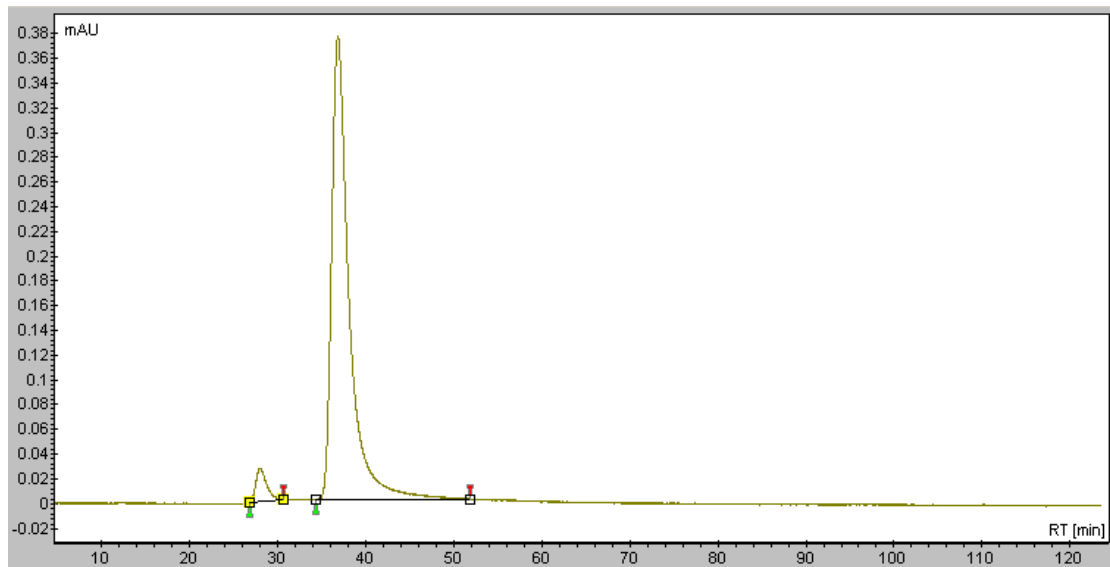

| # | Start time[min] | Time[min] | End time[min] | Area%  |
|---|-----------------|-----------|---------------|--------|
| 1 | 26.852          | 28.03     | 30.638        | 4.291  |
| 2 | 34.425          | 36.84     | 51.81         | 95.709 |

### <sup>1</sup>H NMR spectrum of 4y

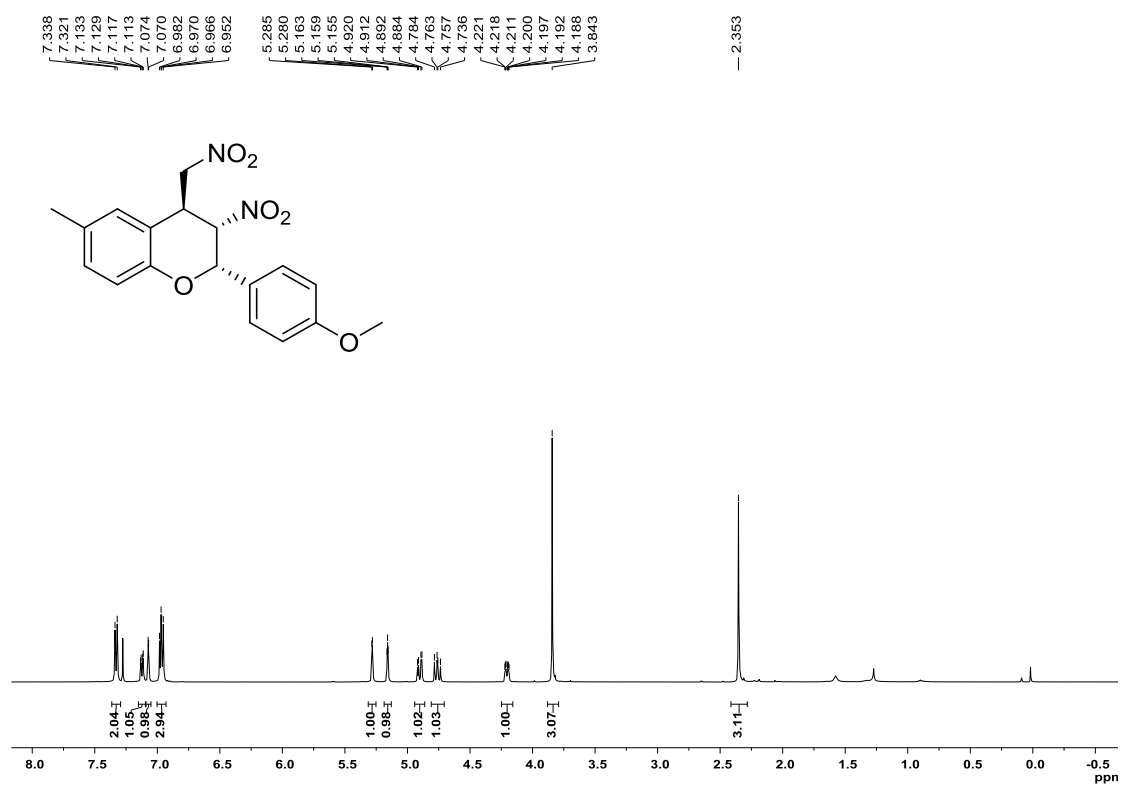

### <sup>13</sup>C NMR spectrum of 4y

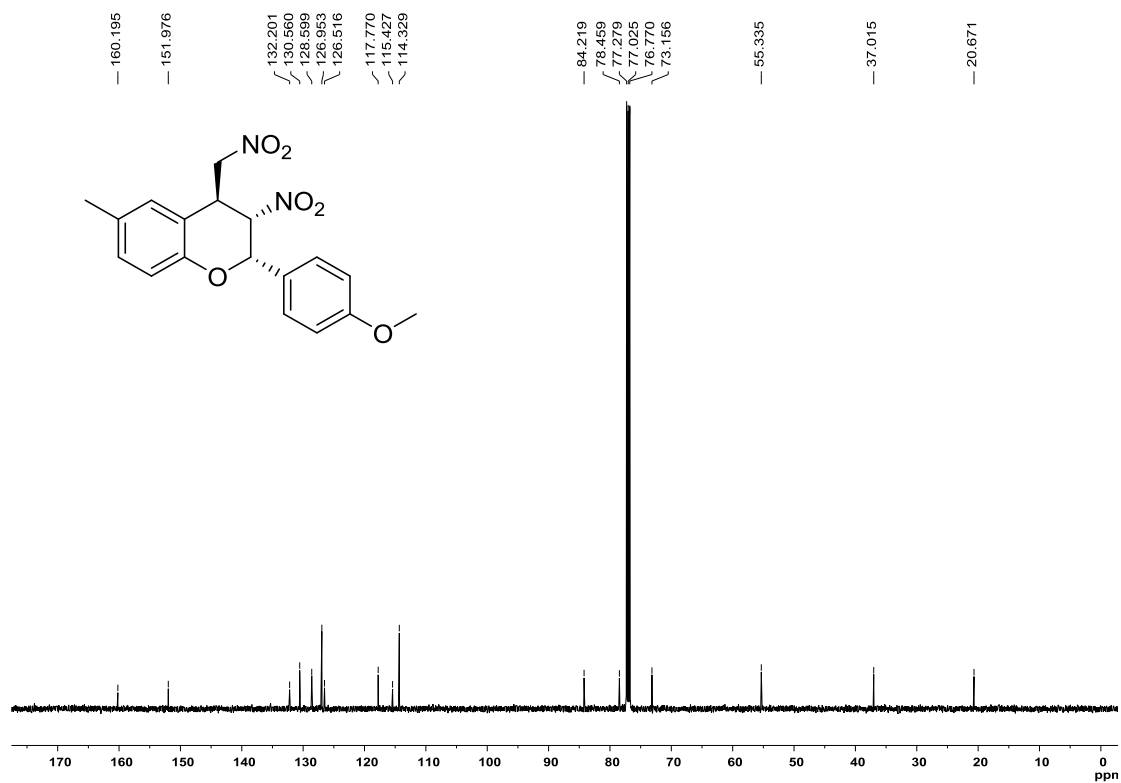

## HPLC chromatograms of 4y

### 4y-rac

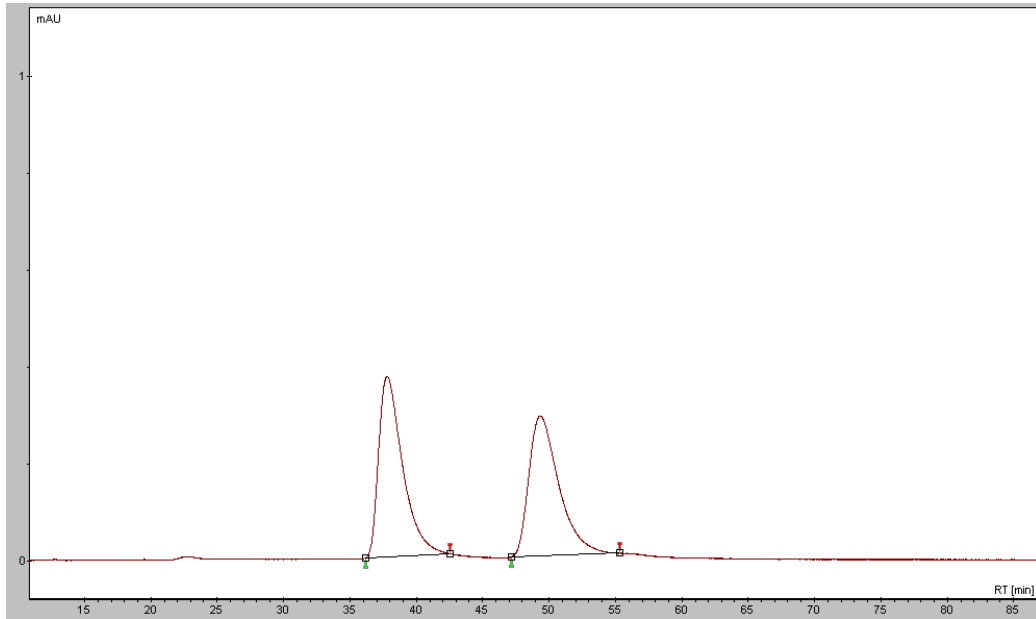

| # | Start time[min] | Time[min] | End time[min] | Area%  |
|---|-----------------|-----------|---------------|--------|
| 1 | 36.181          | 37.786    | 42.535        | 50.787 |
| 2 | 47.163          | 49.316    | 55.321        | 49.213 |

### 4y-chr

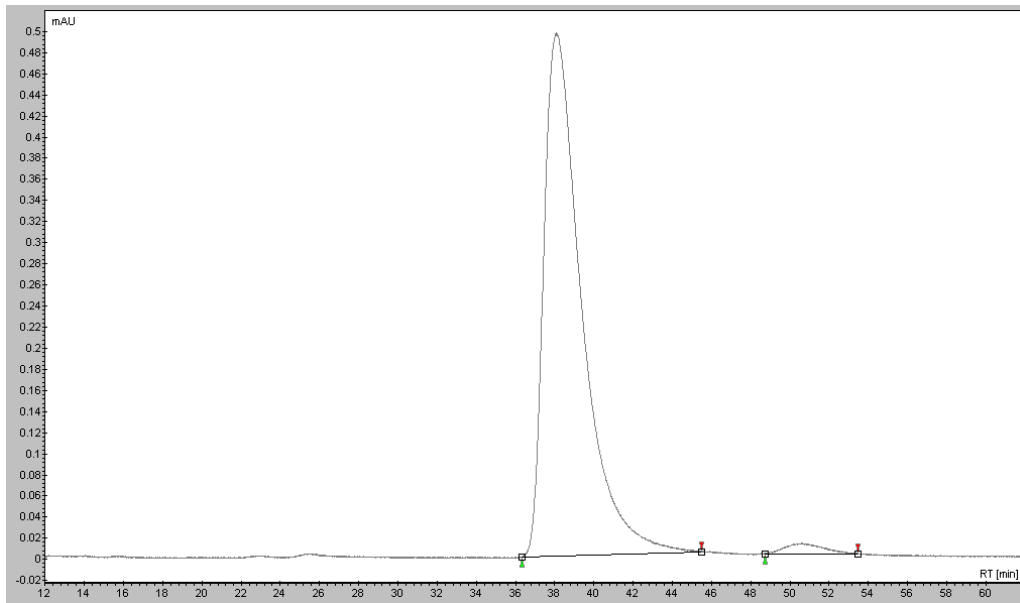

| # | Start time[min] | Time[min] | End time[min] | Area%  |
|---|-----------------|-----------|---------------|--------|
| 1 | 36.349          | 38.077    | 45.501        | 98.119 |
| 2 | 48.723          | 50.556    | 53.493        | 1.881  |

### <sup>1</sup>H NMR spectrum of 4z

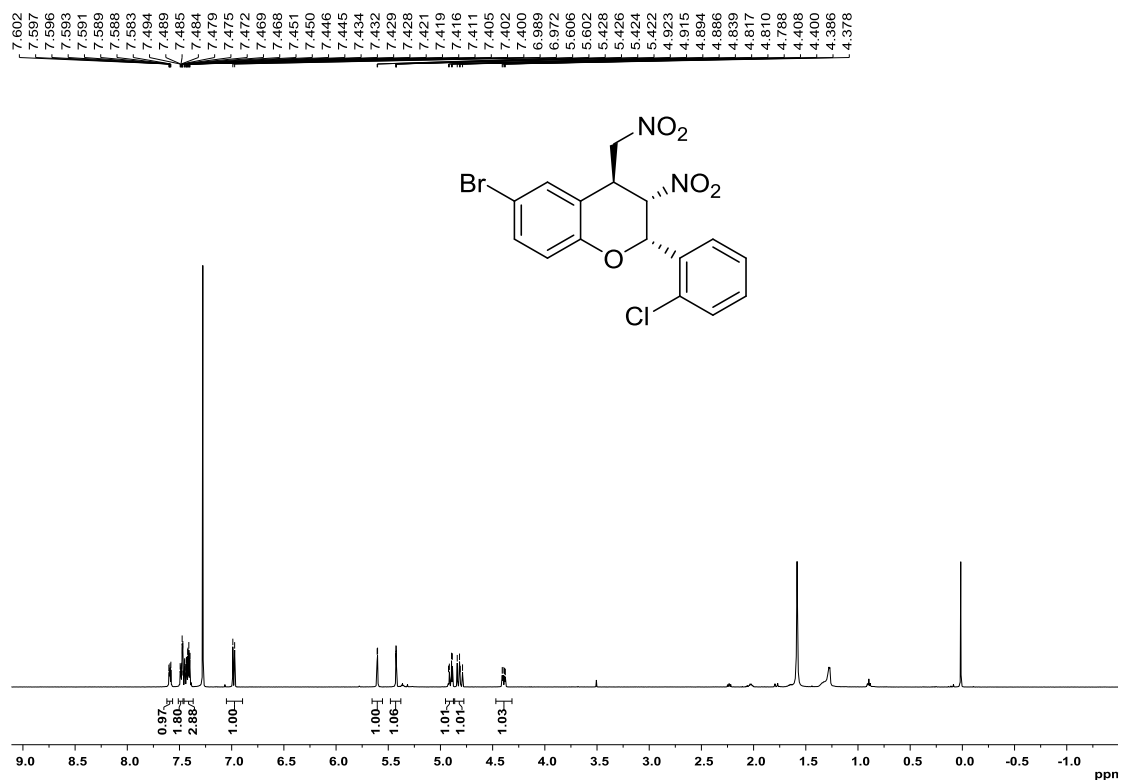

### <sup>13</sup>C NMR spectrum of 4z

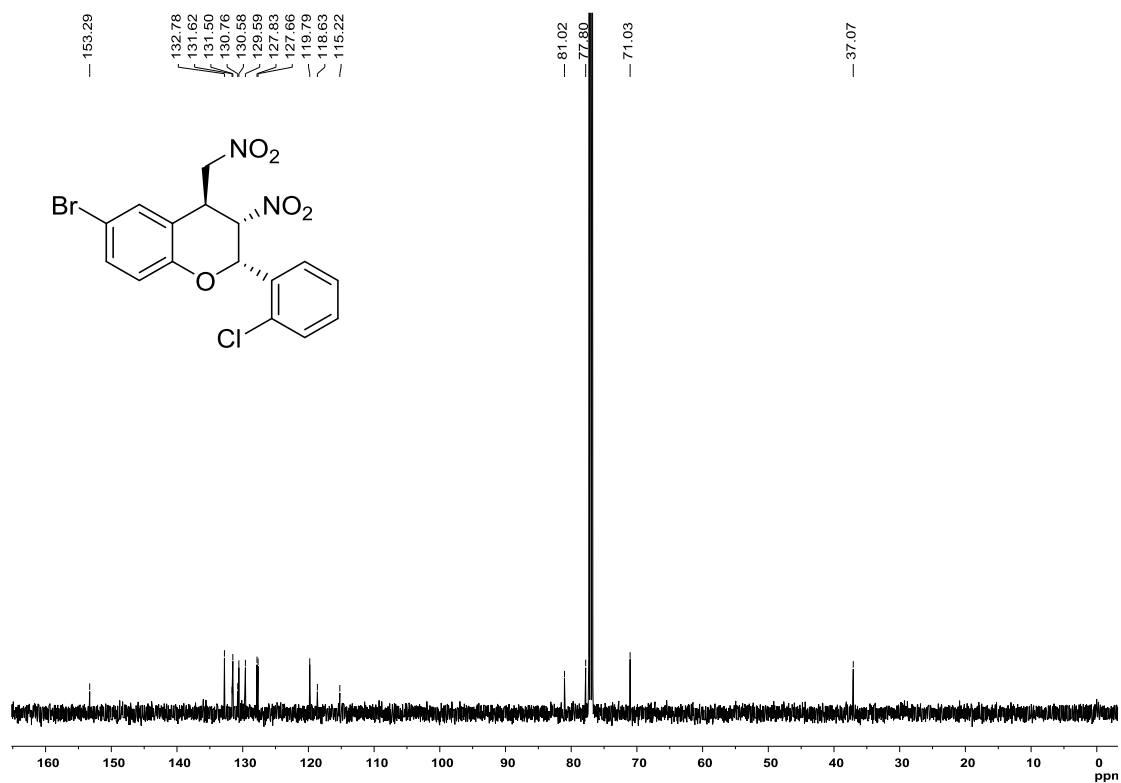

## HPLC chromatograms of 4z

### 4z-rac

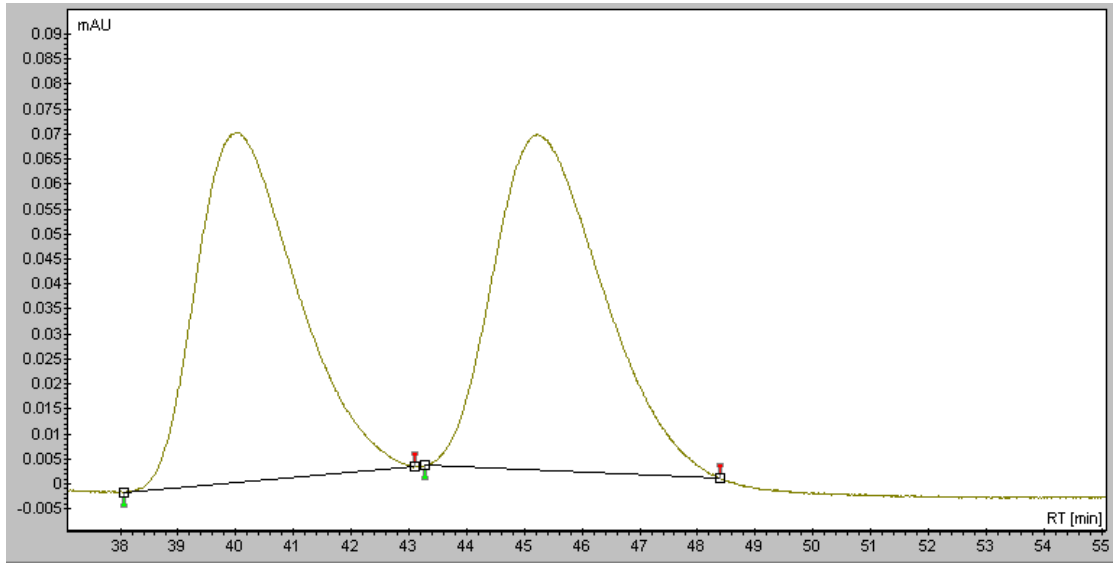

| # | Start time[min] | Time[min] | End time[min] | Area%  |
|---|-----------------|-----------|---------------|--------|
| 1 | 38.066          | 39.997    | 43.111        | 48.915 |
| 2 | 43.267          | 45.223    | 48.39         | 51.085 |

### 4z-chr

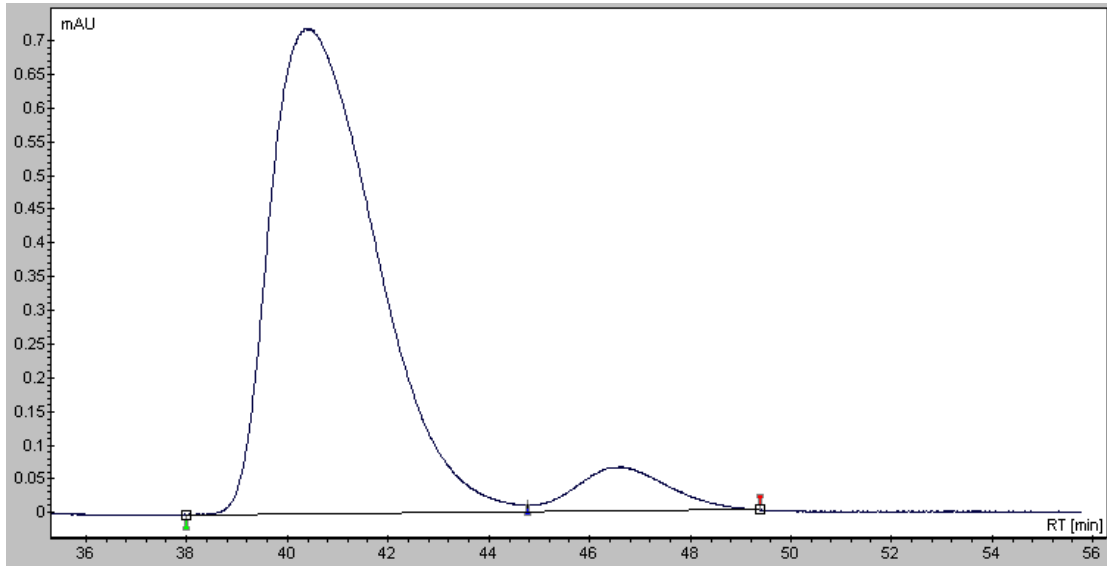

| # | Start time[min] | Time[min] | End time[min] | Area%  |
|---|-----------------|-----------|---------------|--------|
| 1 | 38.249          | 40.397    | 44.759        | 92.965 |
| 2 | 44.759          | 46.57     | 49.42         | 7.035  |

### <sup>1</sup>H NMR spectrum of 5a

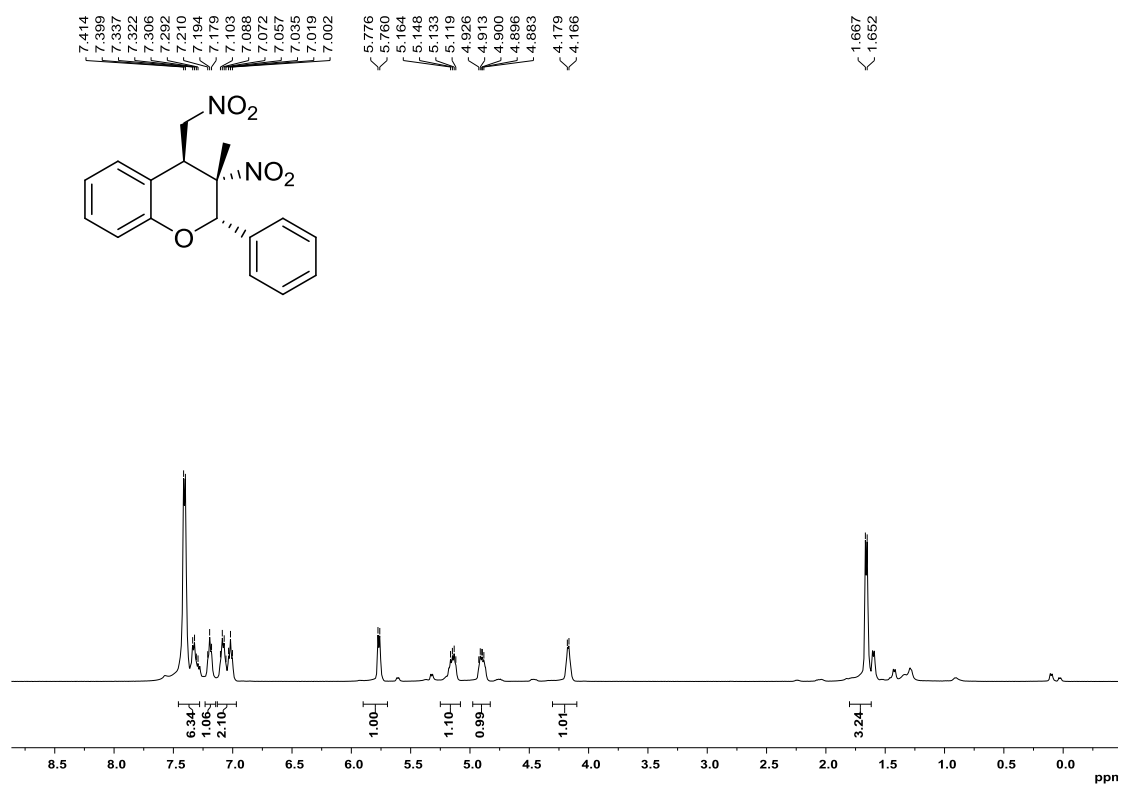

### <sup>13</sup>C NMR spectrum of 5a

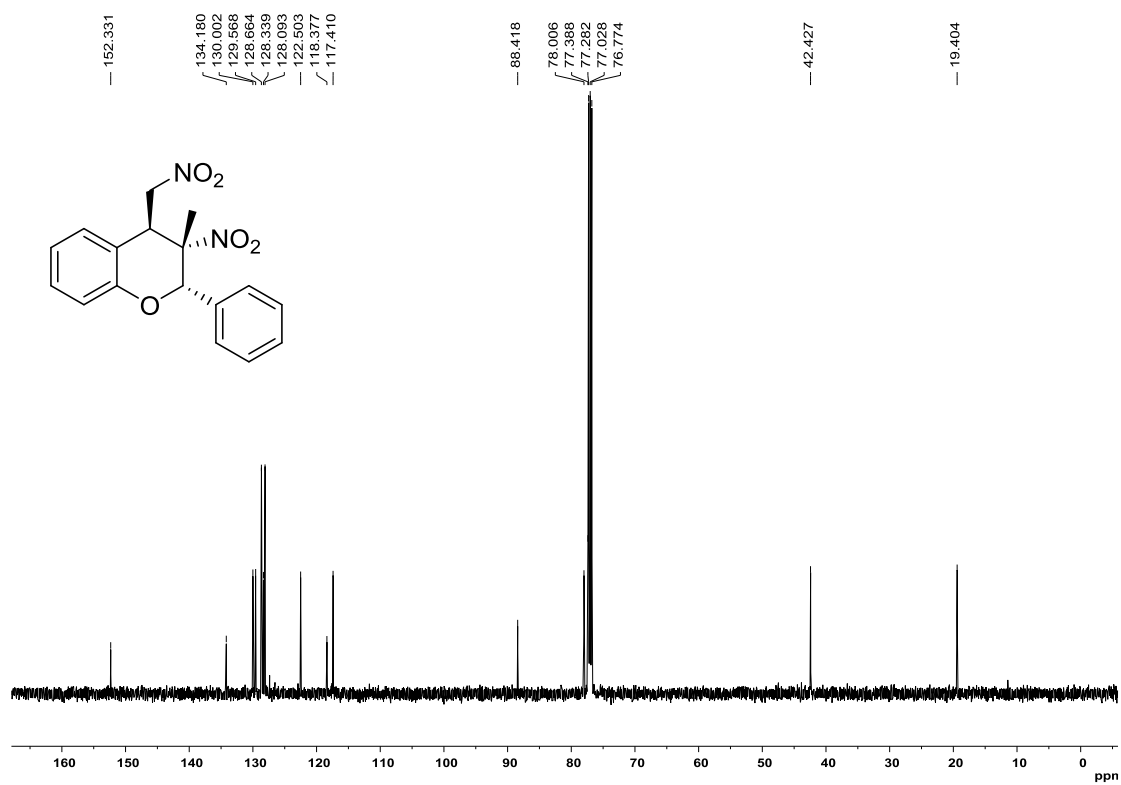

## HPLC chromatograms of 5a

### 5a-rac

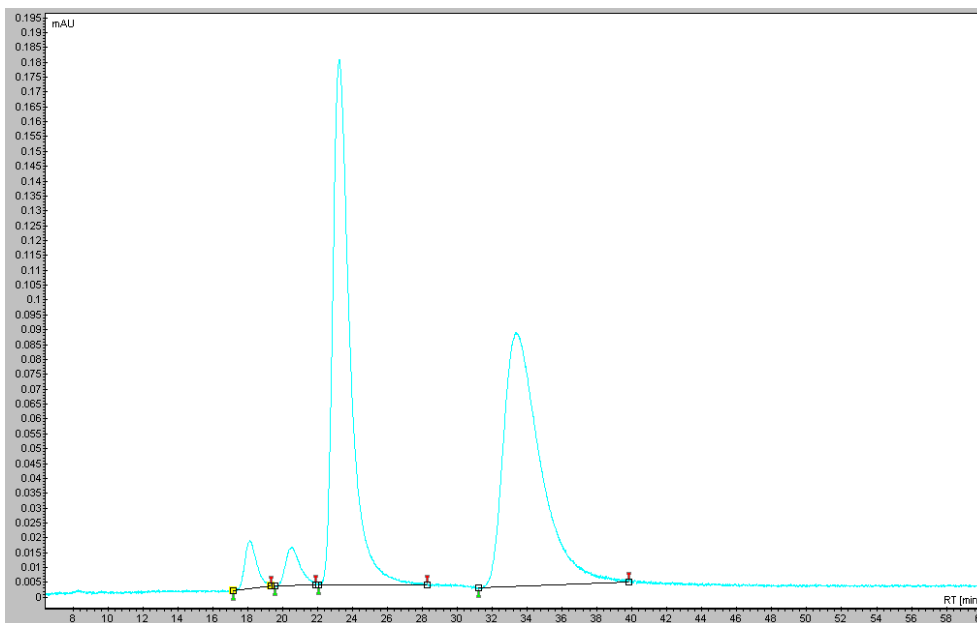

| # | Start time[min] | Time[min] | End time[min] | Area%  |
|---|-----------------|-----------|---------------|--------|
| 1 | 17.171          | 18.114    | 19.326        | 2.838  |
| 2 | 19.535          | 20.499    | 21.898        | 2.804  |
| 3 | 22.037          | 23.232    | 28.294        | 46.508 |
| 4 | 31.214          | 33.375    | 39.834        | 47.851 |

### 5a-chr

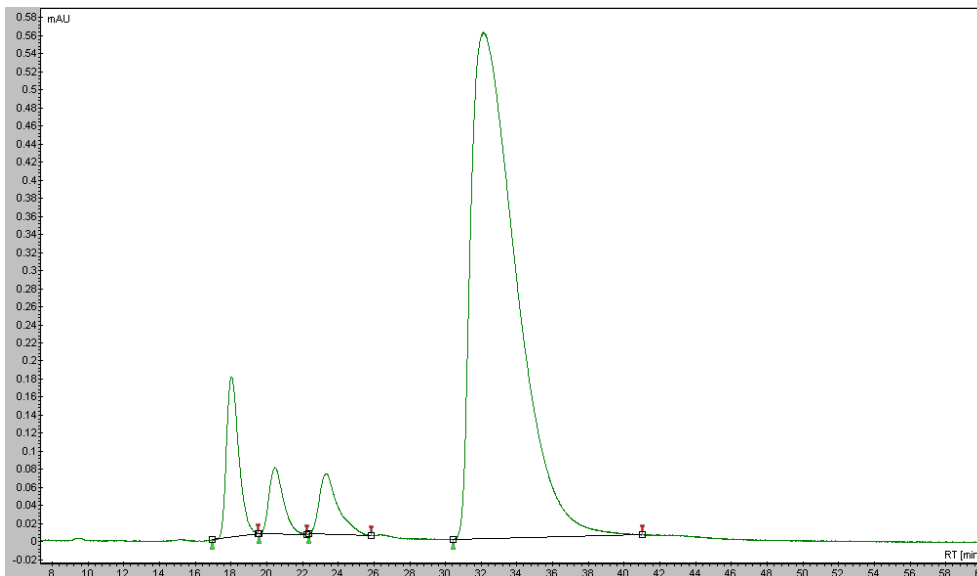

| # | Start time[min] | Time[min] | End time[min] | Area%  |
|---|-----------------|-----------|---------------|--------|
| 1 | 16.924          | 18.034    | 19.528        | 7.338  |
| 2 | 19.587          | 20.459    | 22.250        | 3.537  |
| 3 | 22.377          | 23.325    | 25.842        | 4.237  |
| 4 | 30.407          | 32.095    | 41.009        | 84.888 |

#### 4. X-ray crystal structure of the compound 4s

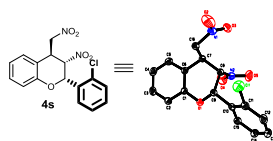

**Figure 1** X-ray crystal structure of the compound **4s**

**Table 1.** Crystal data and structure refinement parameters of the compound **4s**

| Parameter                              | Value                                                                                                                             |
|----------------------------------------|-----------------------------------------------------------------------------------------------------------------------------------|
| CCDC deposition number                 | 1437002                                                                                                                           |
| Empirical formula                      | C <sub>16</sub> H <sub>13</sub> ClN <sub>2</sub> O <sub>5</sub>                                                                   |
| Formula weight                         | 348.73                                                                                                                            |
| Temperature                            | 293(2)K                                                                                                                           |
| Wavelength                             | 0.71073 Å                                                                                                                         |
| Crystal system                         | Monoclinic                                                                                                                        |
| Space group                            | P 21/c                                                                                                                            |
| Cell dimensions                        | $a = 9.4352(14)$ Å $\alpha = 90^\circ$<br>$b = 10.2572(16)$ Å $\beta = 105.653(3)^\circ$<br>$c = 16.421(2)$ Å $\gamma = 90^\circ$ |
| Volume                                 | 1530.3(4) Å <sup>3</sup>                                                                                                          |
| Z                                      | 4                                                                                                                                 |
| Density (calculated)                   | 1.514 Mg/m <sup>3</sup>                                                                                                           |
| Absorption coefficient                 | 0.280 mm <sup>-1</sup>                                                                                                            |
| $F_{000}$                              | 720                                                                                                                               |
| Crystal size                           | 0.2110 × 0.170 × 0.110 mm <sup>3</sup>                                                                                            |
| Theta range for data collection        | 2.242 ° to 25.998 °                                                                                                               |
| Index ranges                           | -10 ≤ $h$ ≤ 11<br>-12 ≤ $k$ ≤ 12<br>-20 ≤ $l$ ≤ 18                                                                                |
| Reflections collected                  | 8914                                                                                                                              |
| Independent reflections                | 3013 [ $R_{int} = 0.0333$ ]                                                                                                       |
| Absorption correction                  | $T_{min} = 0.6682$ , $T_{max} = 0.7456$                                                                                           |
| Refinement method                      | Full-matrix least-squares on $F^2$                                                                                                |
| Data /restraints /parameters           | 3013/0/217                                                                                                                        |
| Goodness of fit on $F^2$               | 1.048                                                                                                                             |
| Final $R$ indices [ $I > 2\sigma(I)$ ] | $R_1 = 0.0449$ , $\omega R_2 = 0.1131$                                                                                            |
| $R$ indices (all data)                 | $R_1 = 0.0573$ , $\omega R_2 = 0.1199$                                                                                            |
| Extinction correction                  | None                                                                                                                              |
| Largest diff. peak and hole            | 0.270 and -0.216 e.Å <sup>-3</sup>                                                                                                |
